# Supplementary material
Source: ML conference proceedings conference paper supplement (https://openreview.net/forum?id=tPI9Sw04sZ)

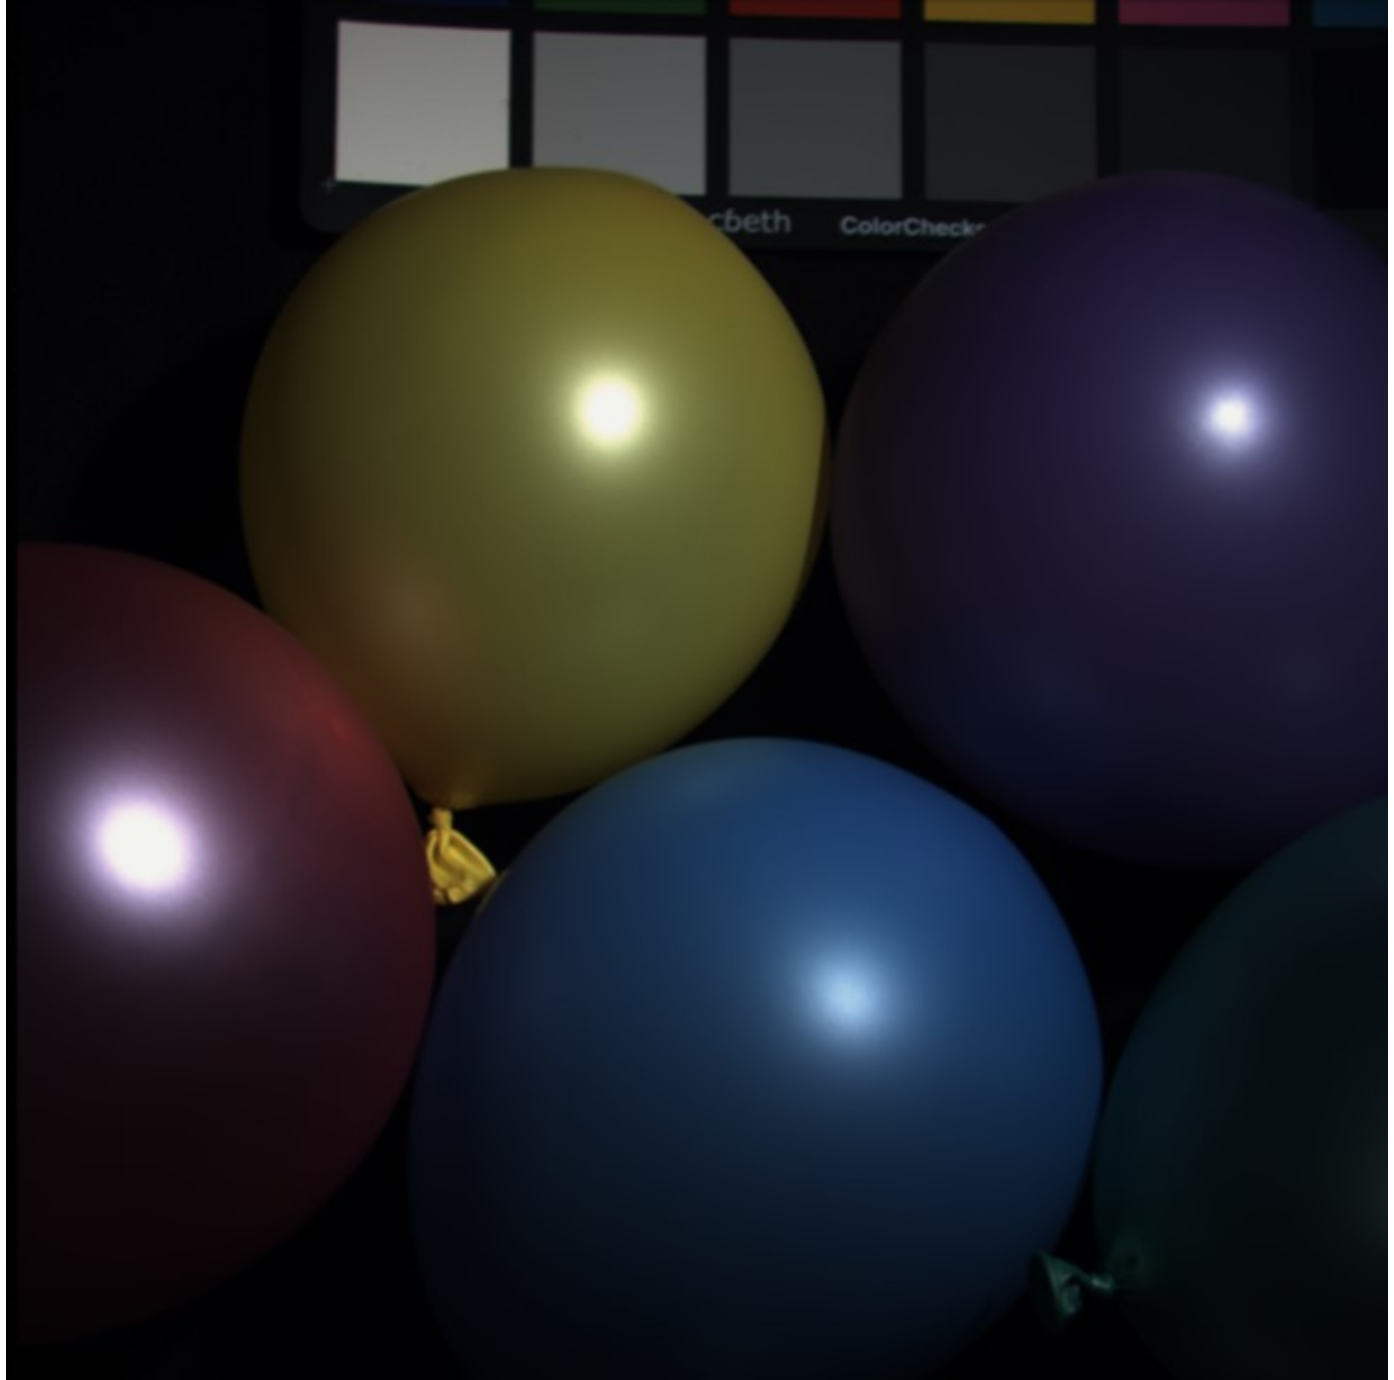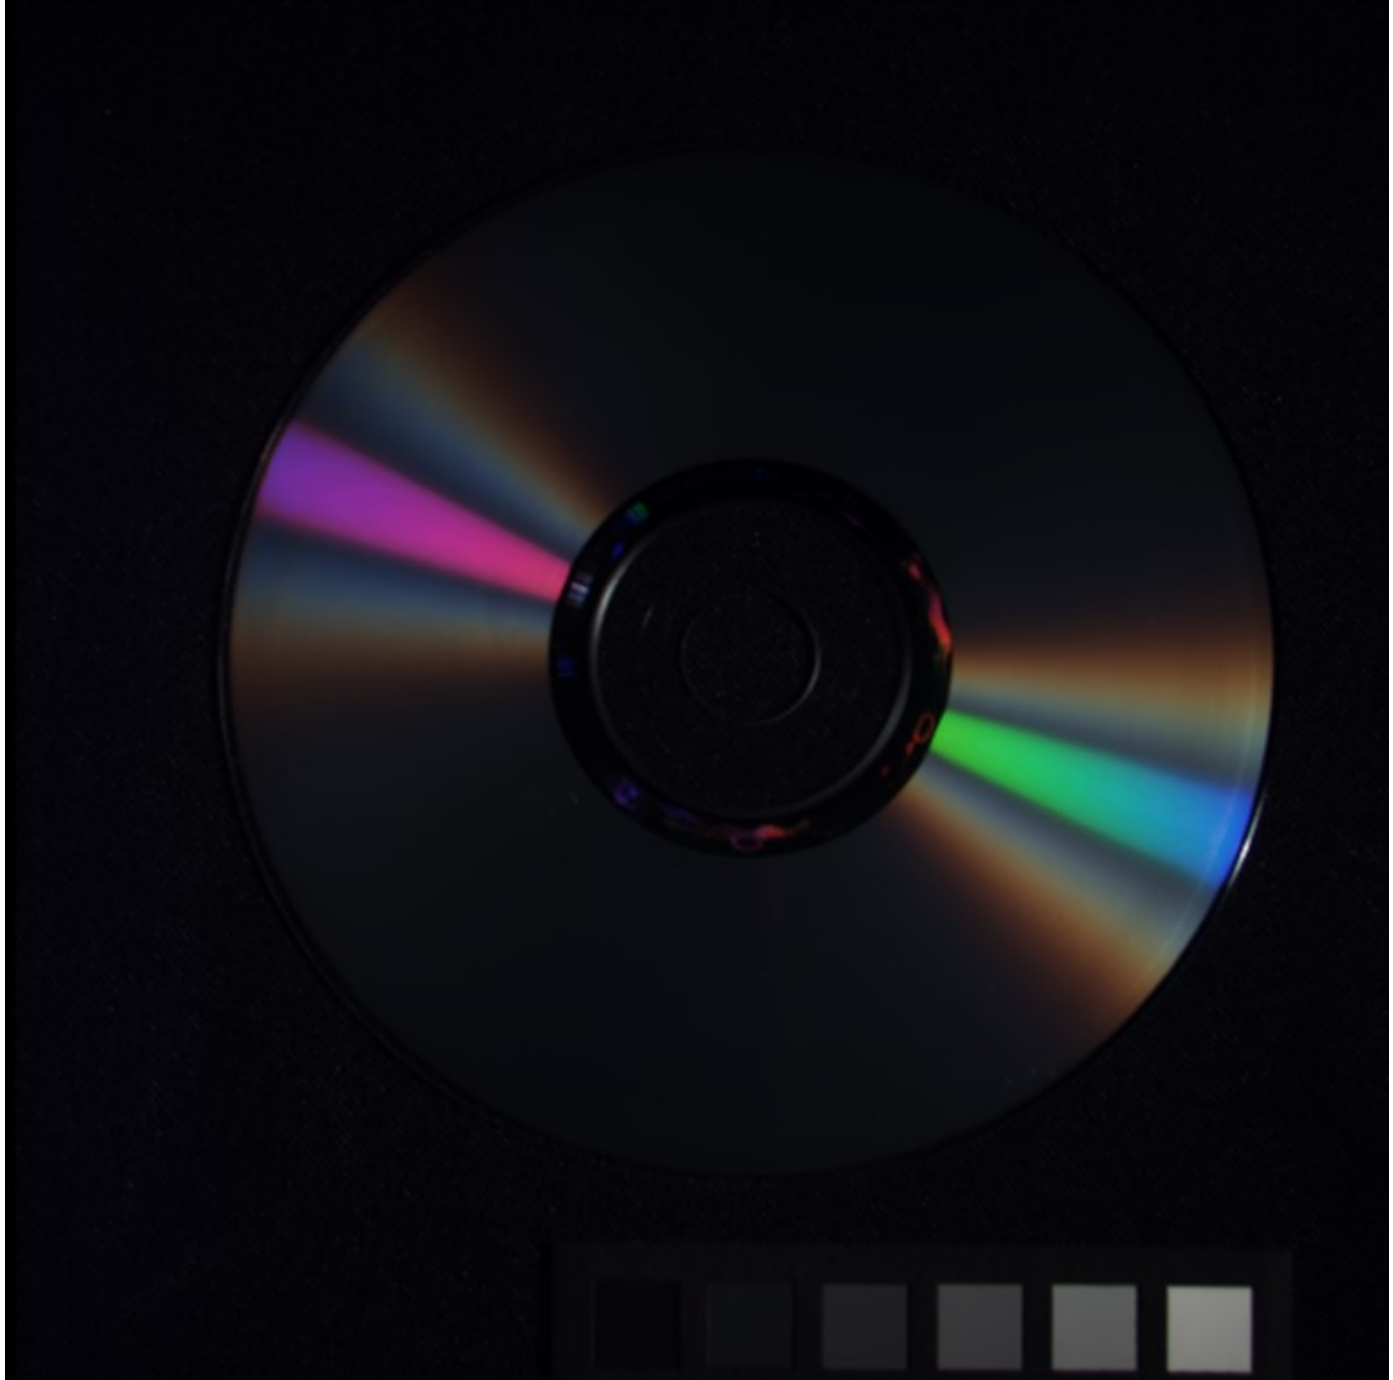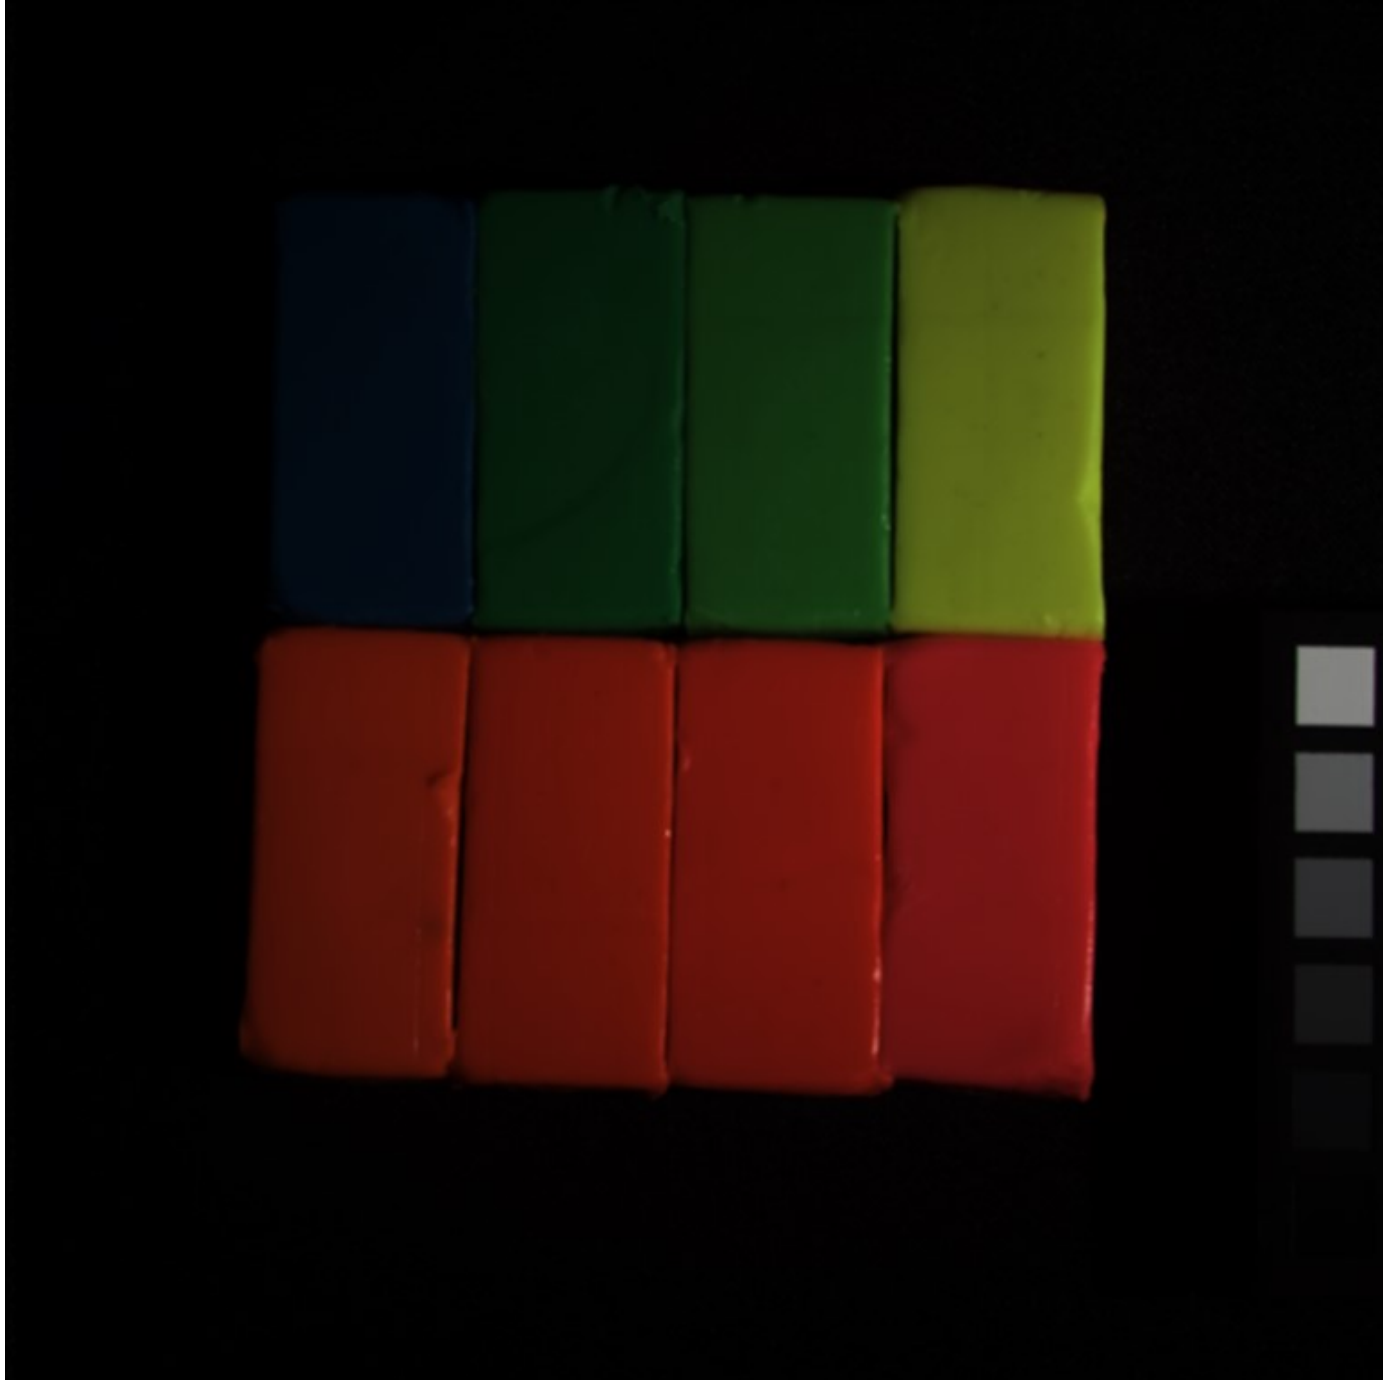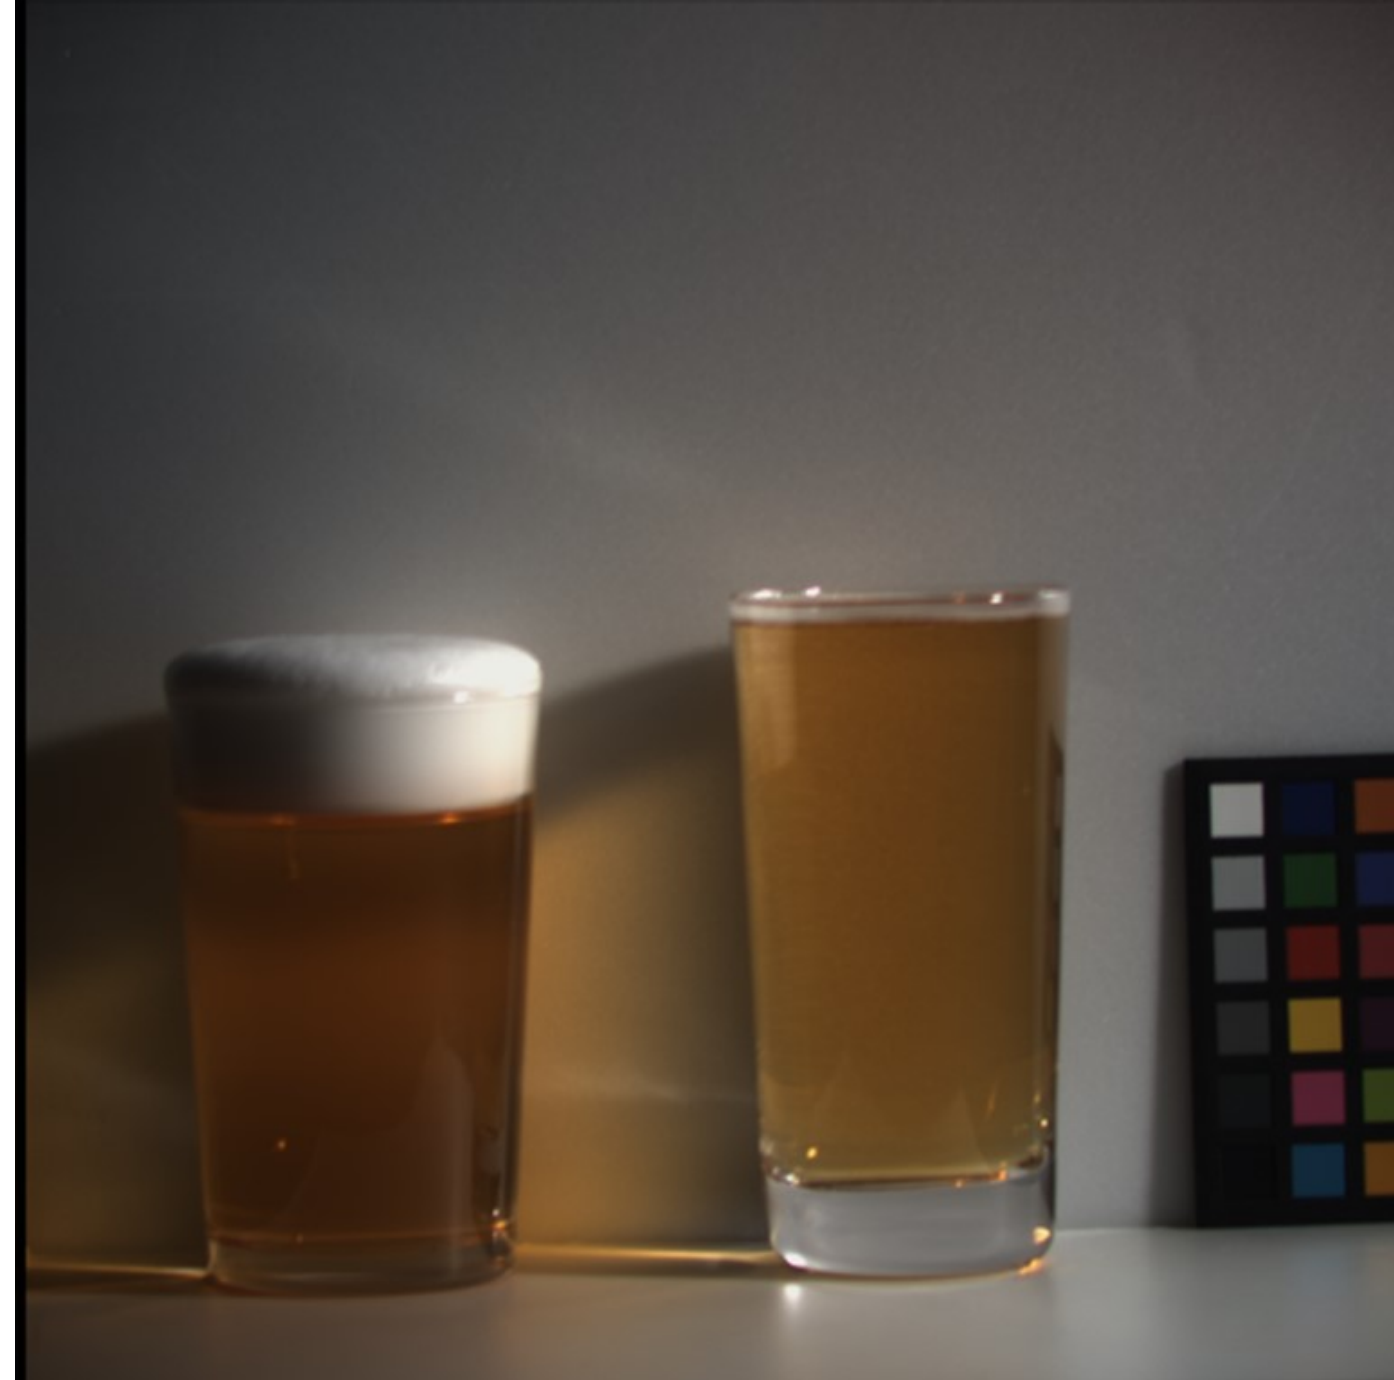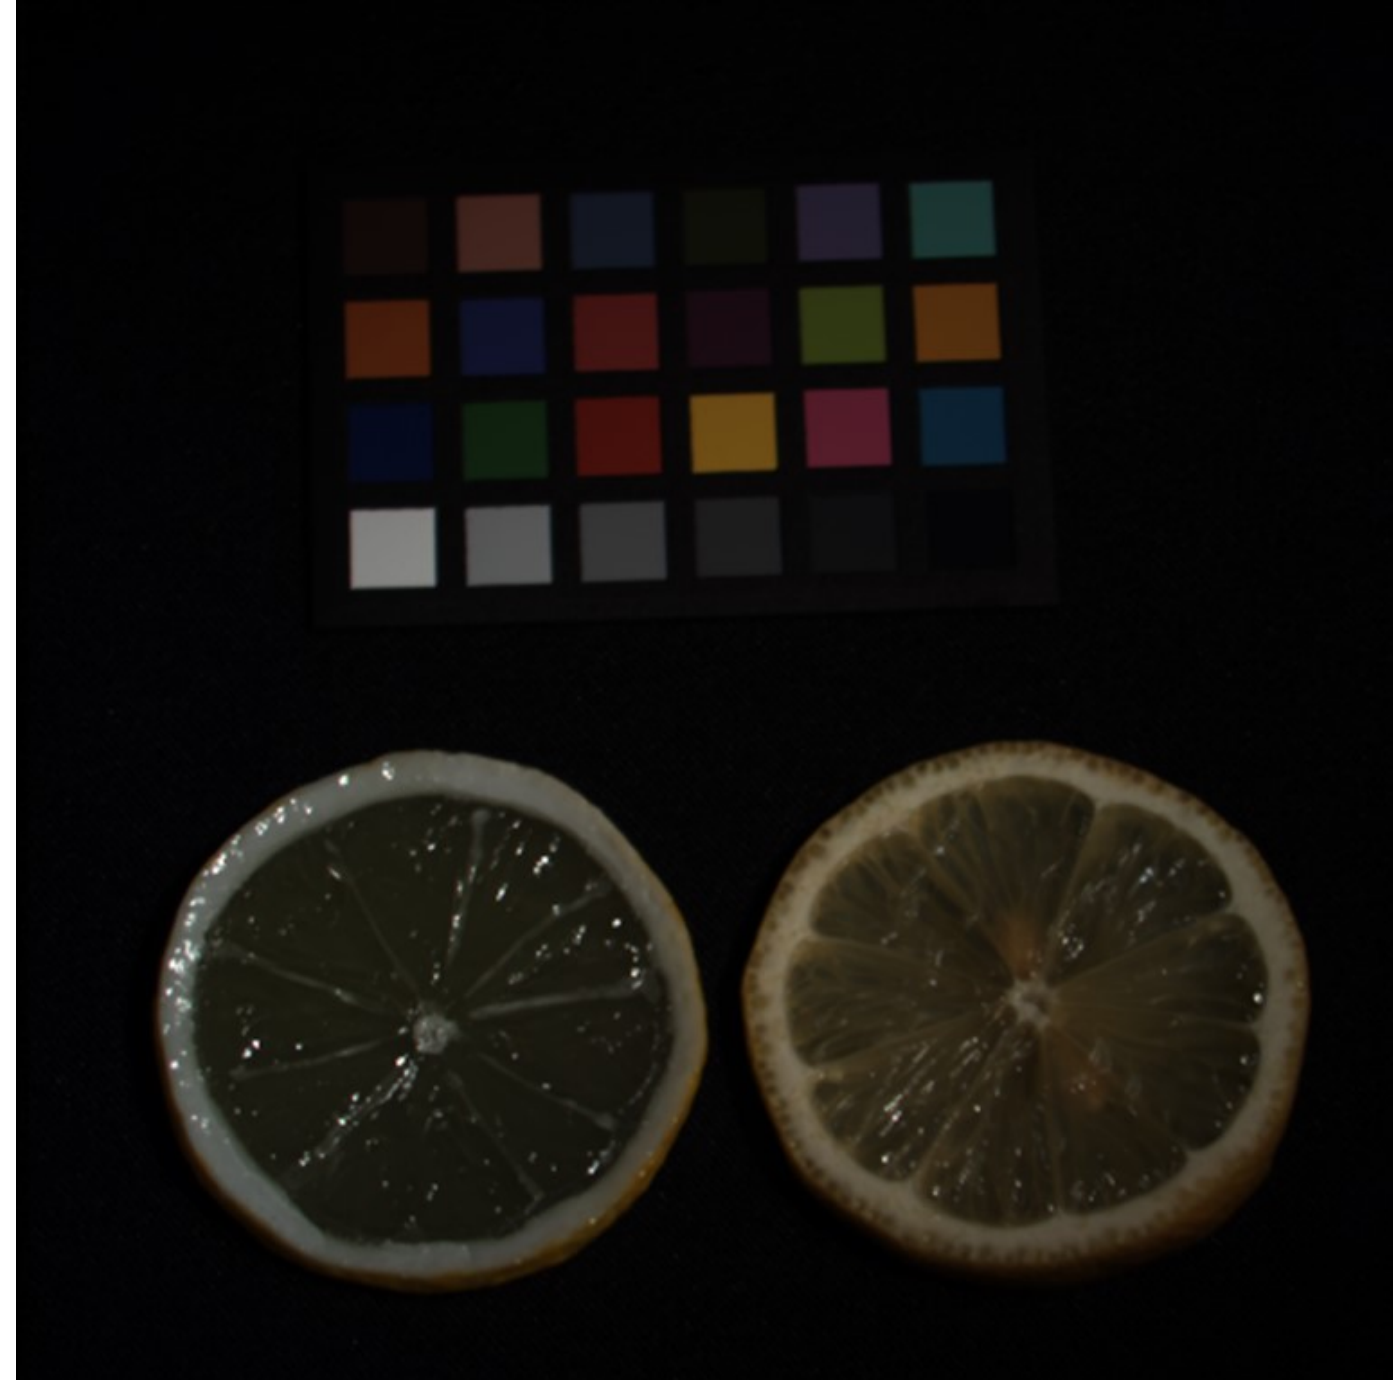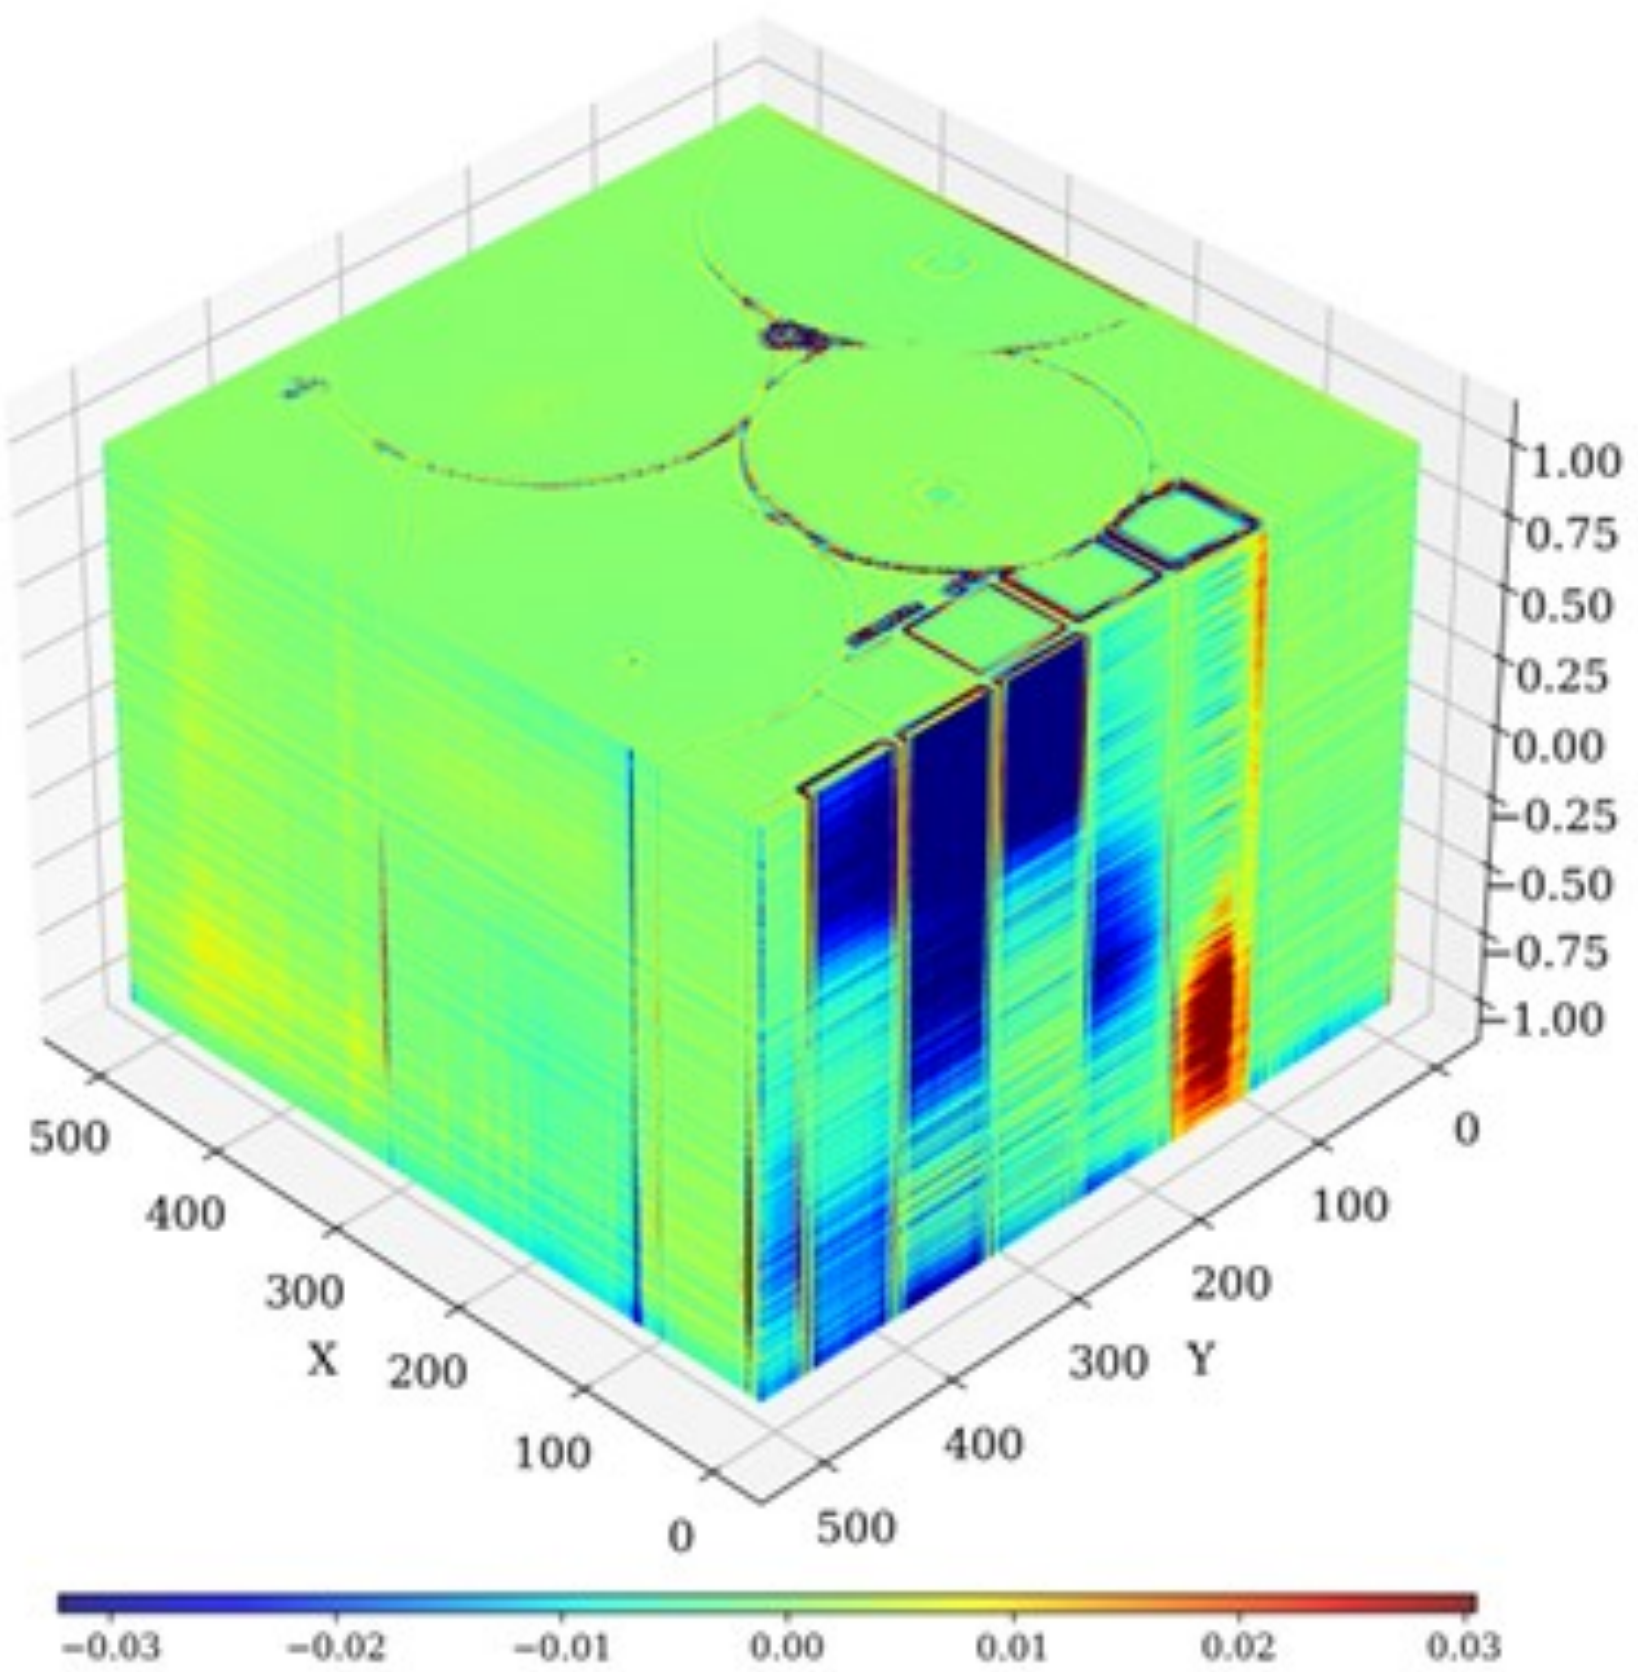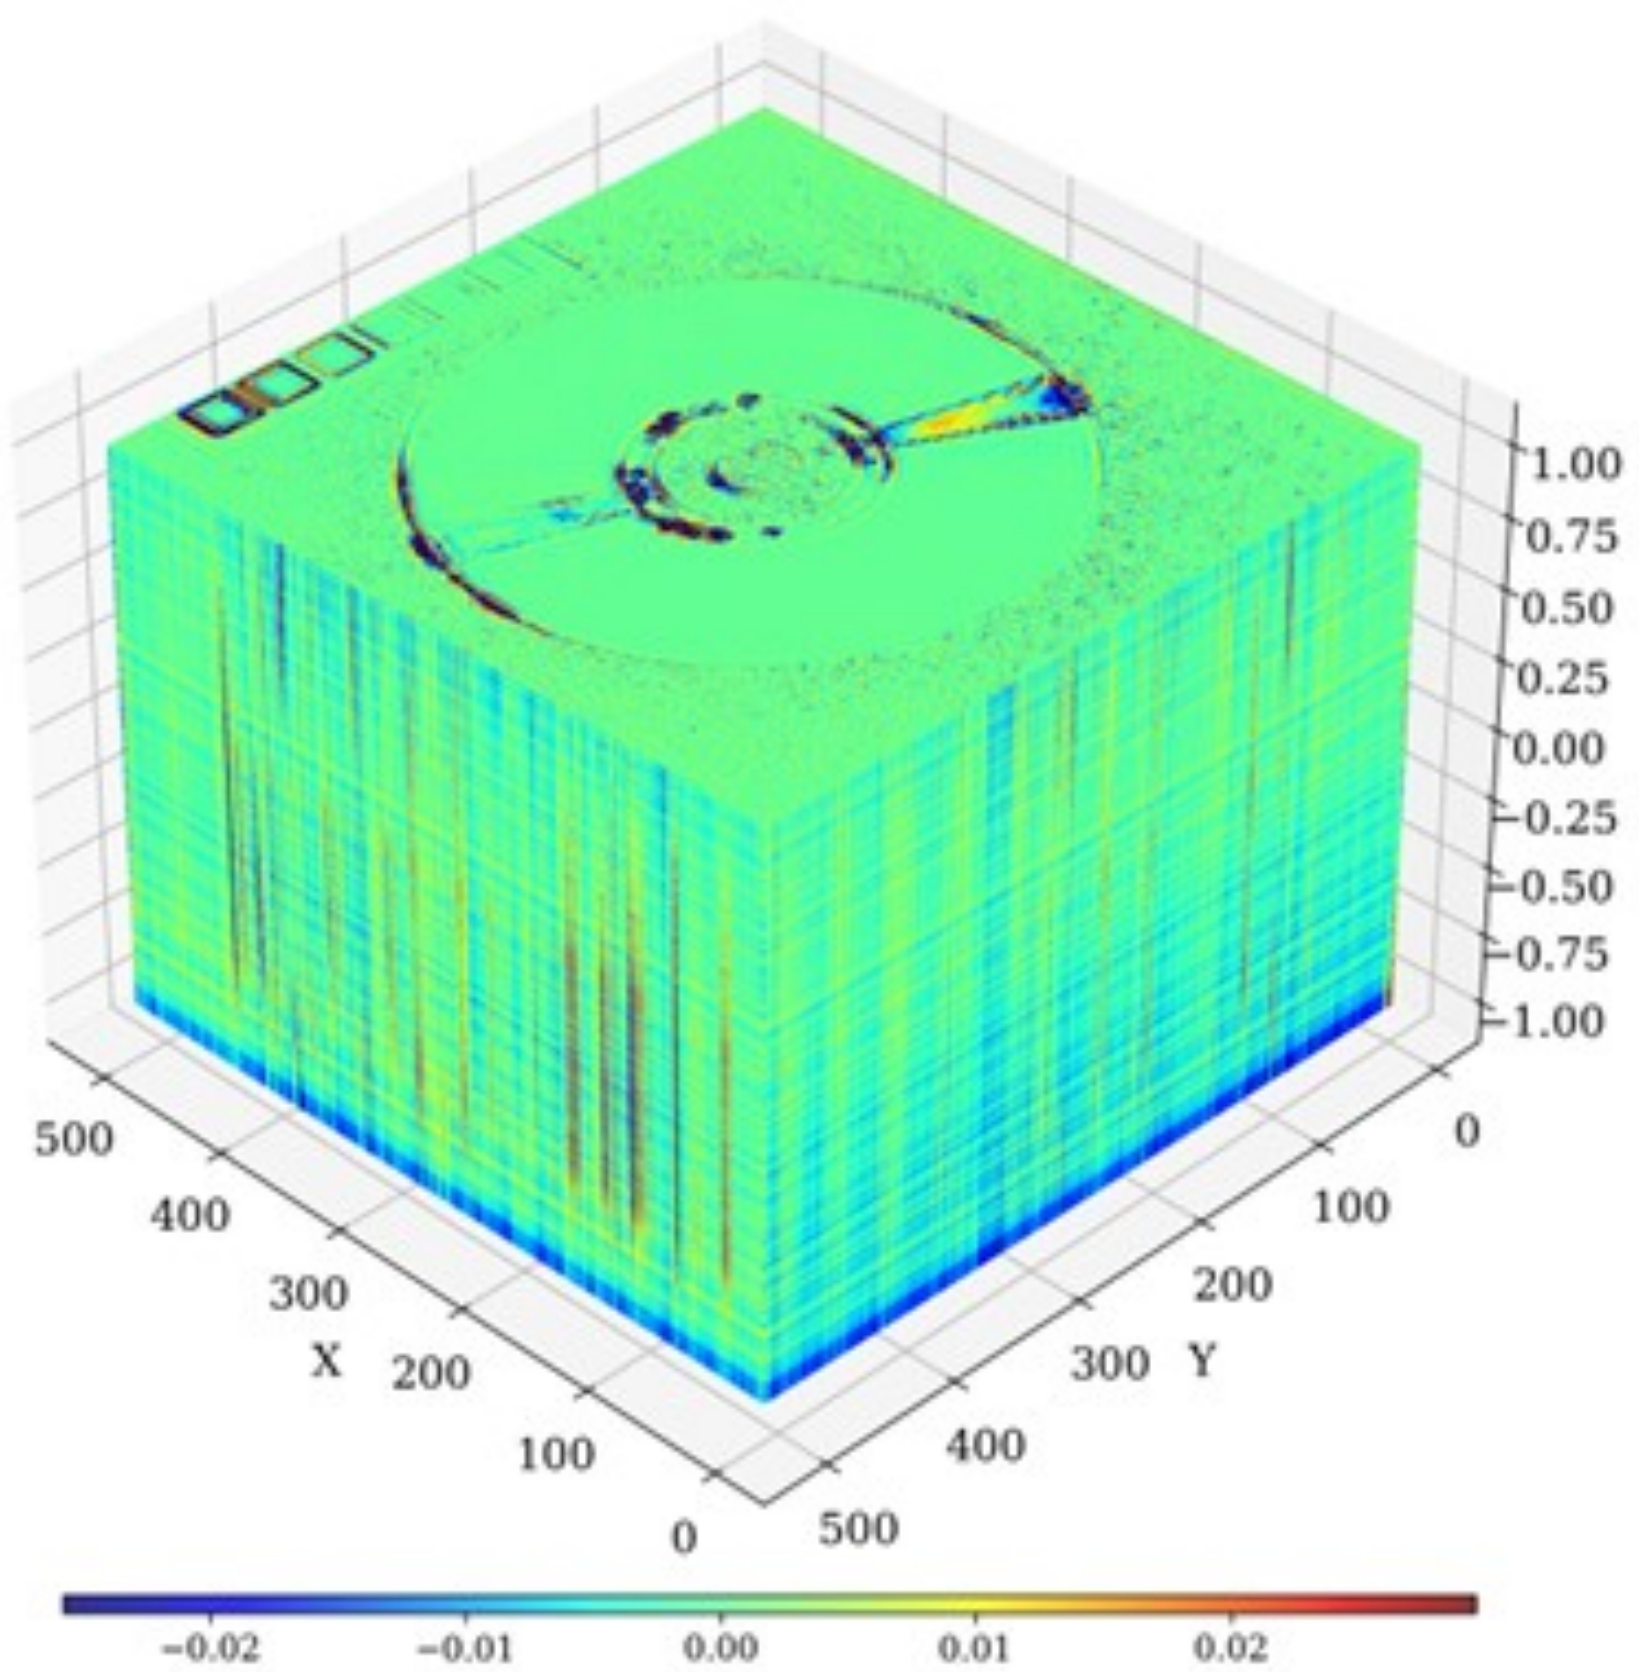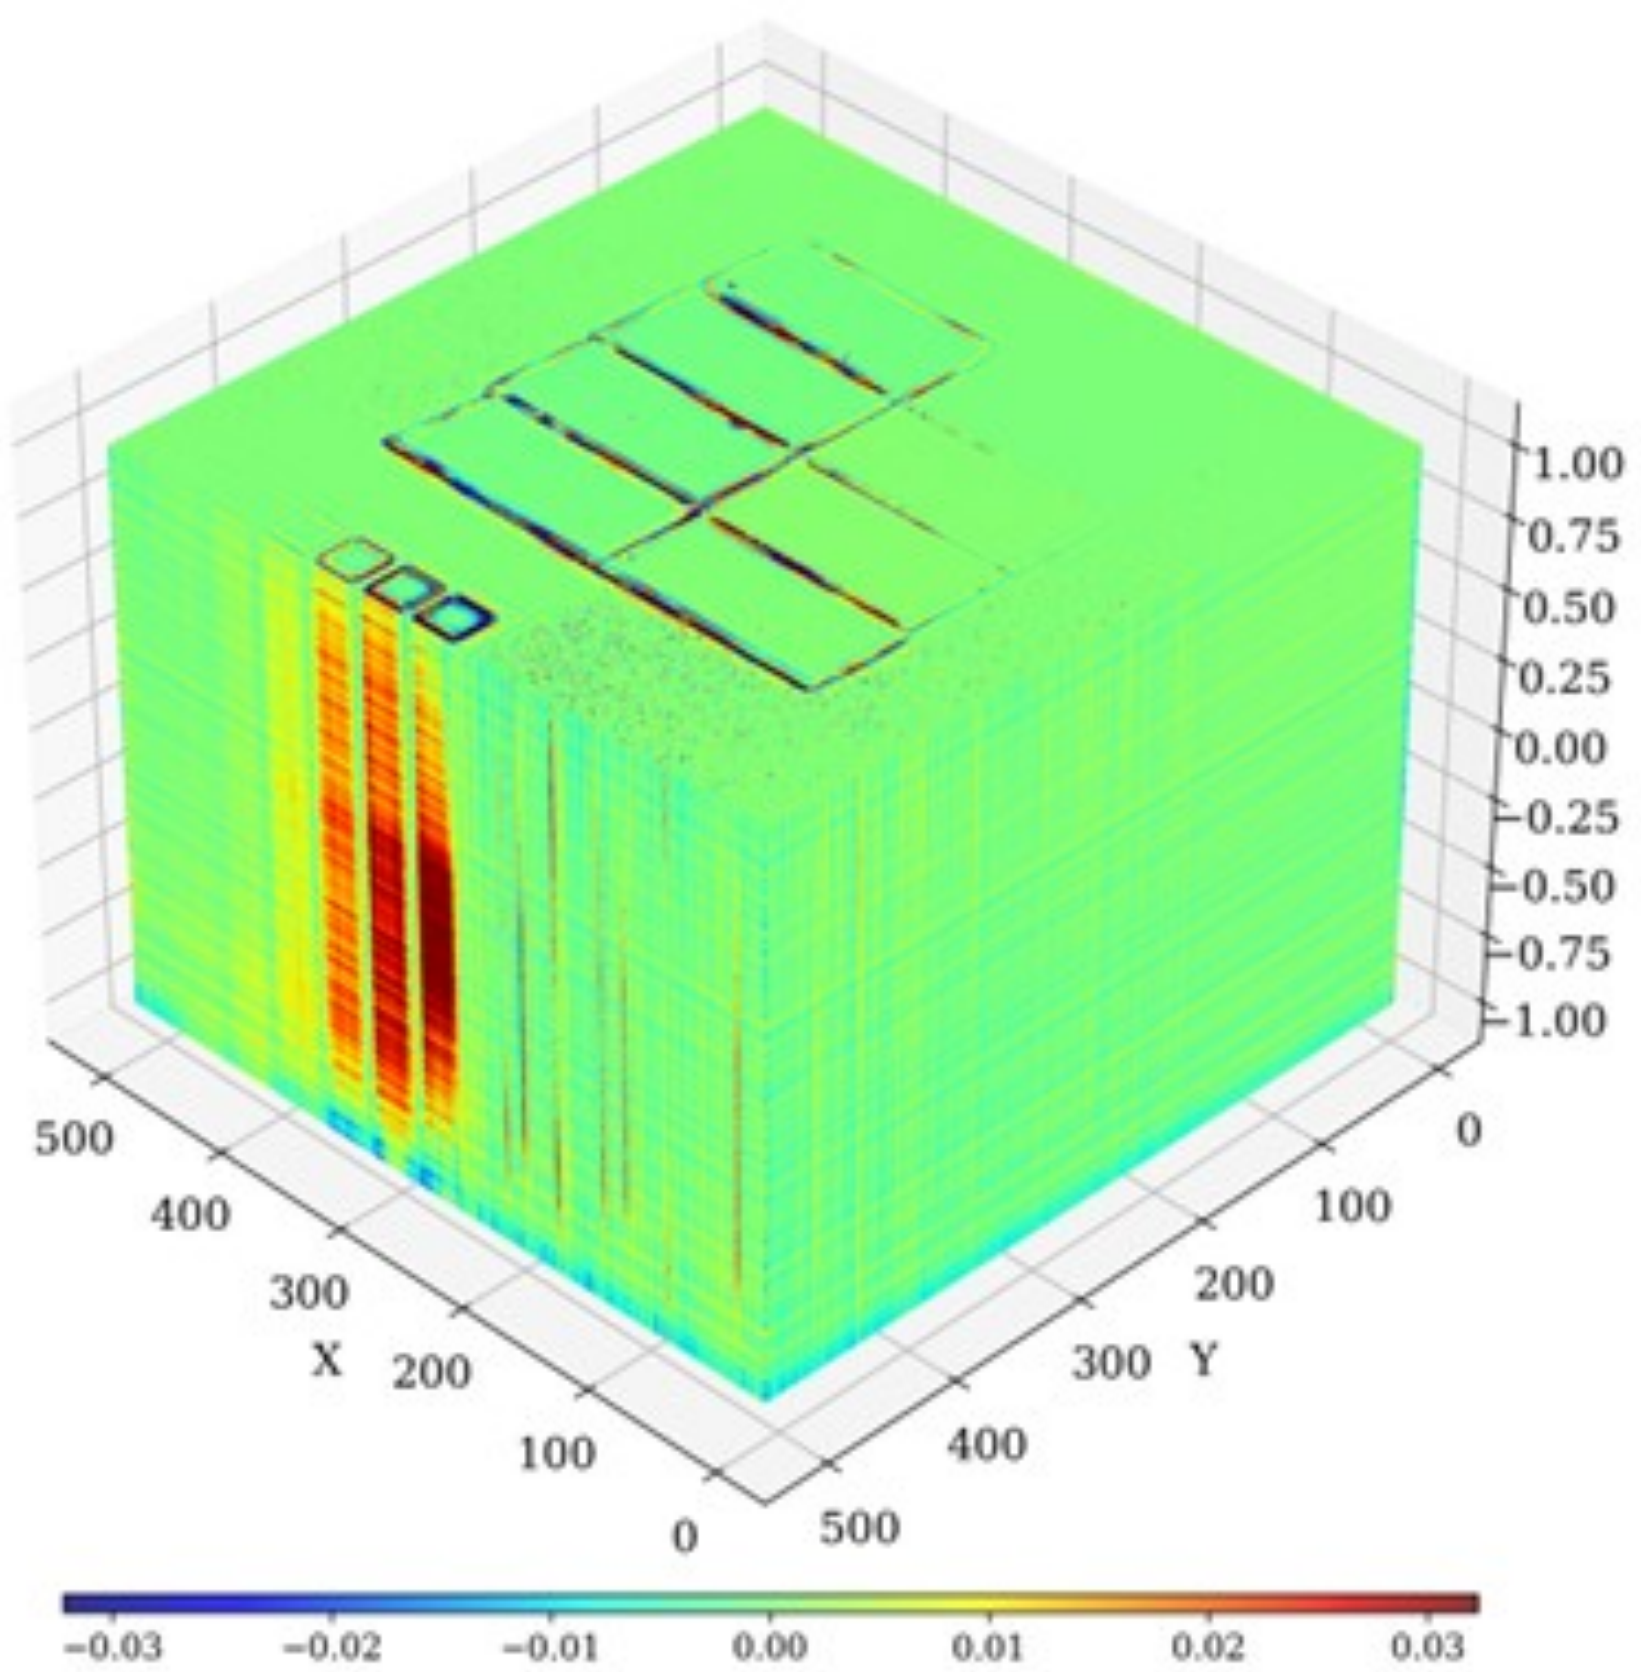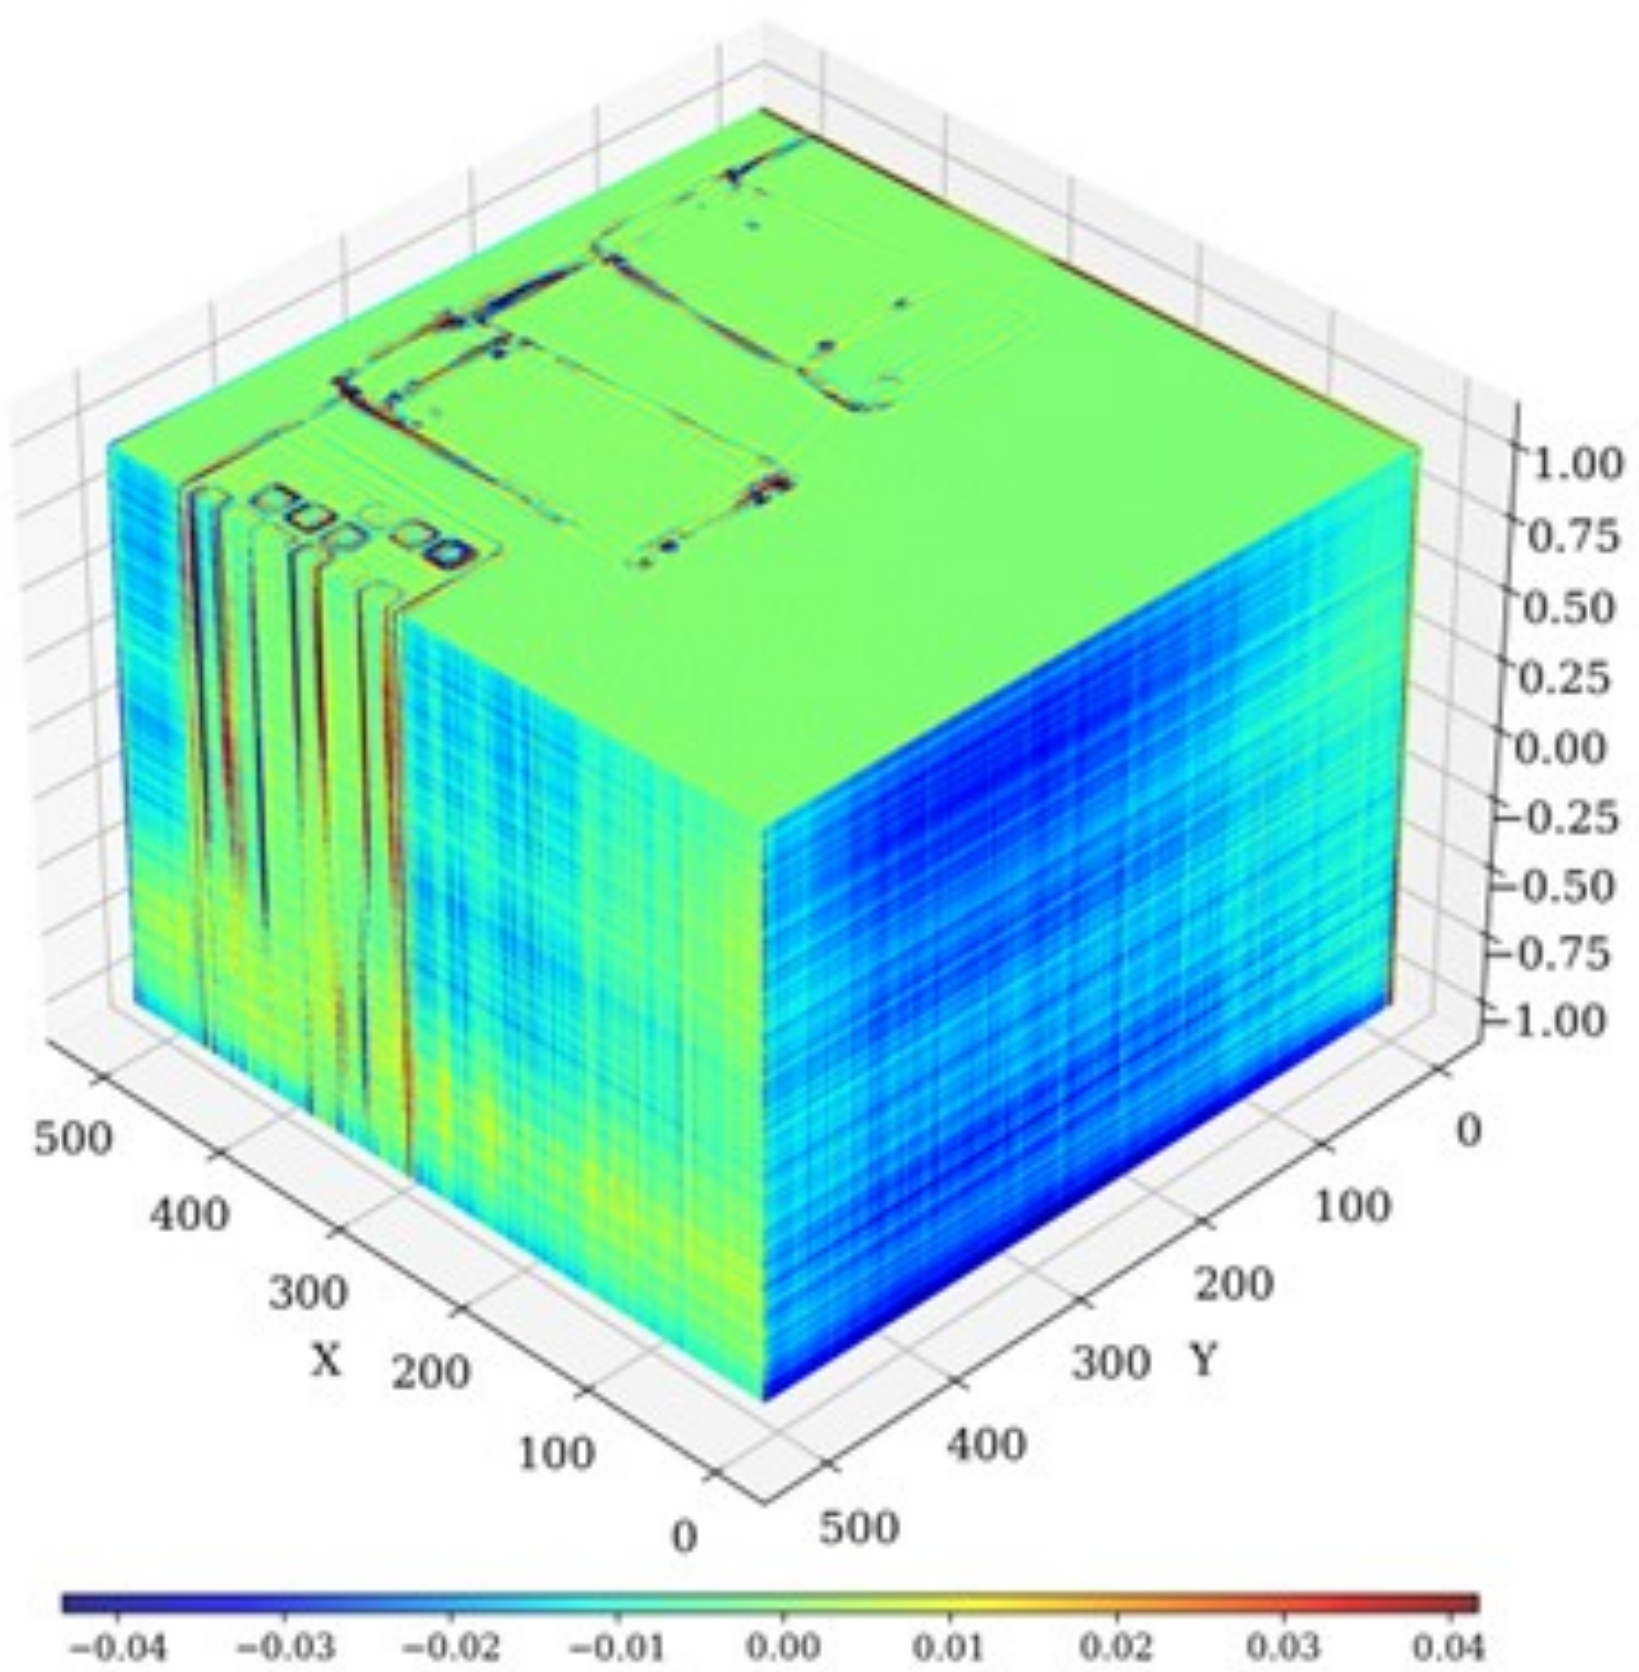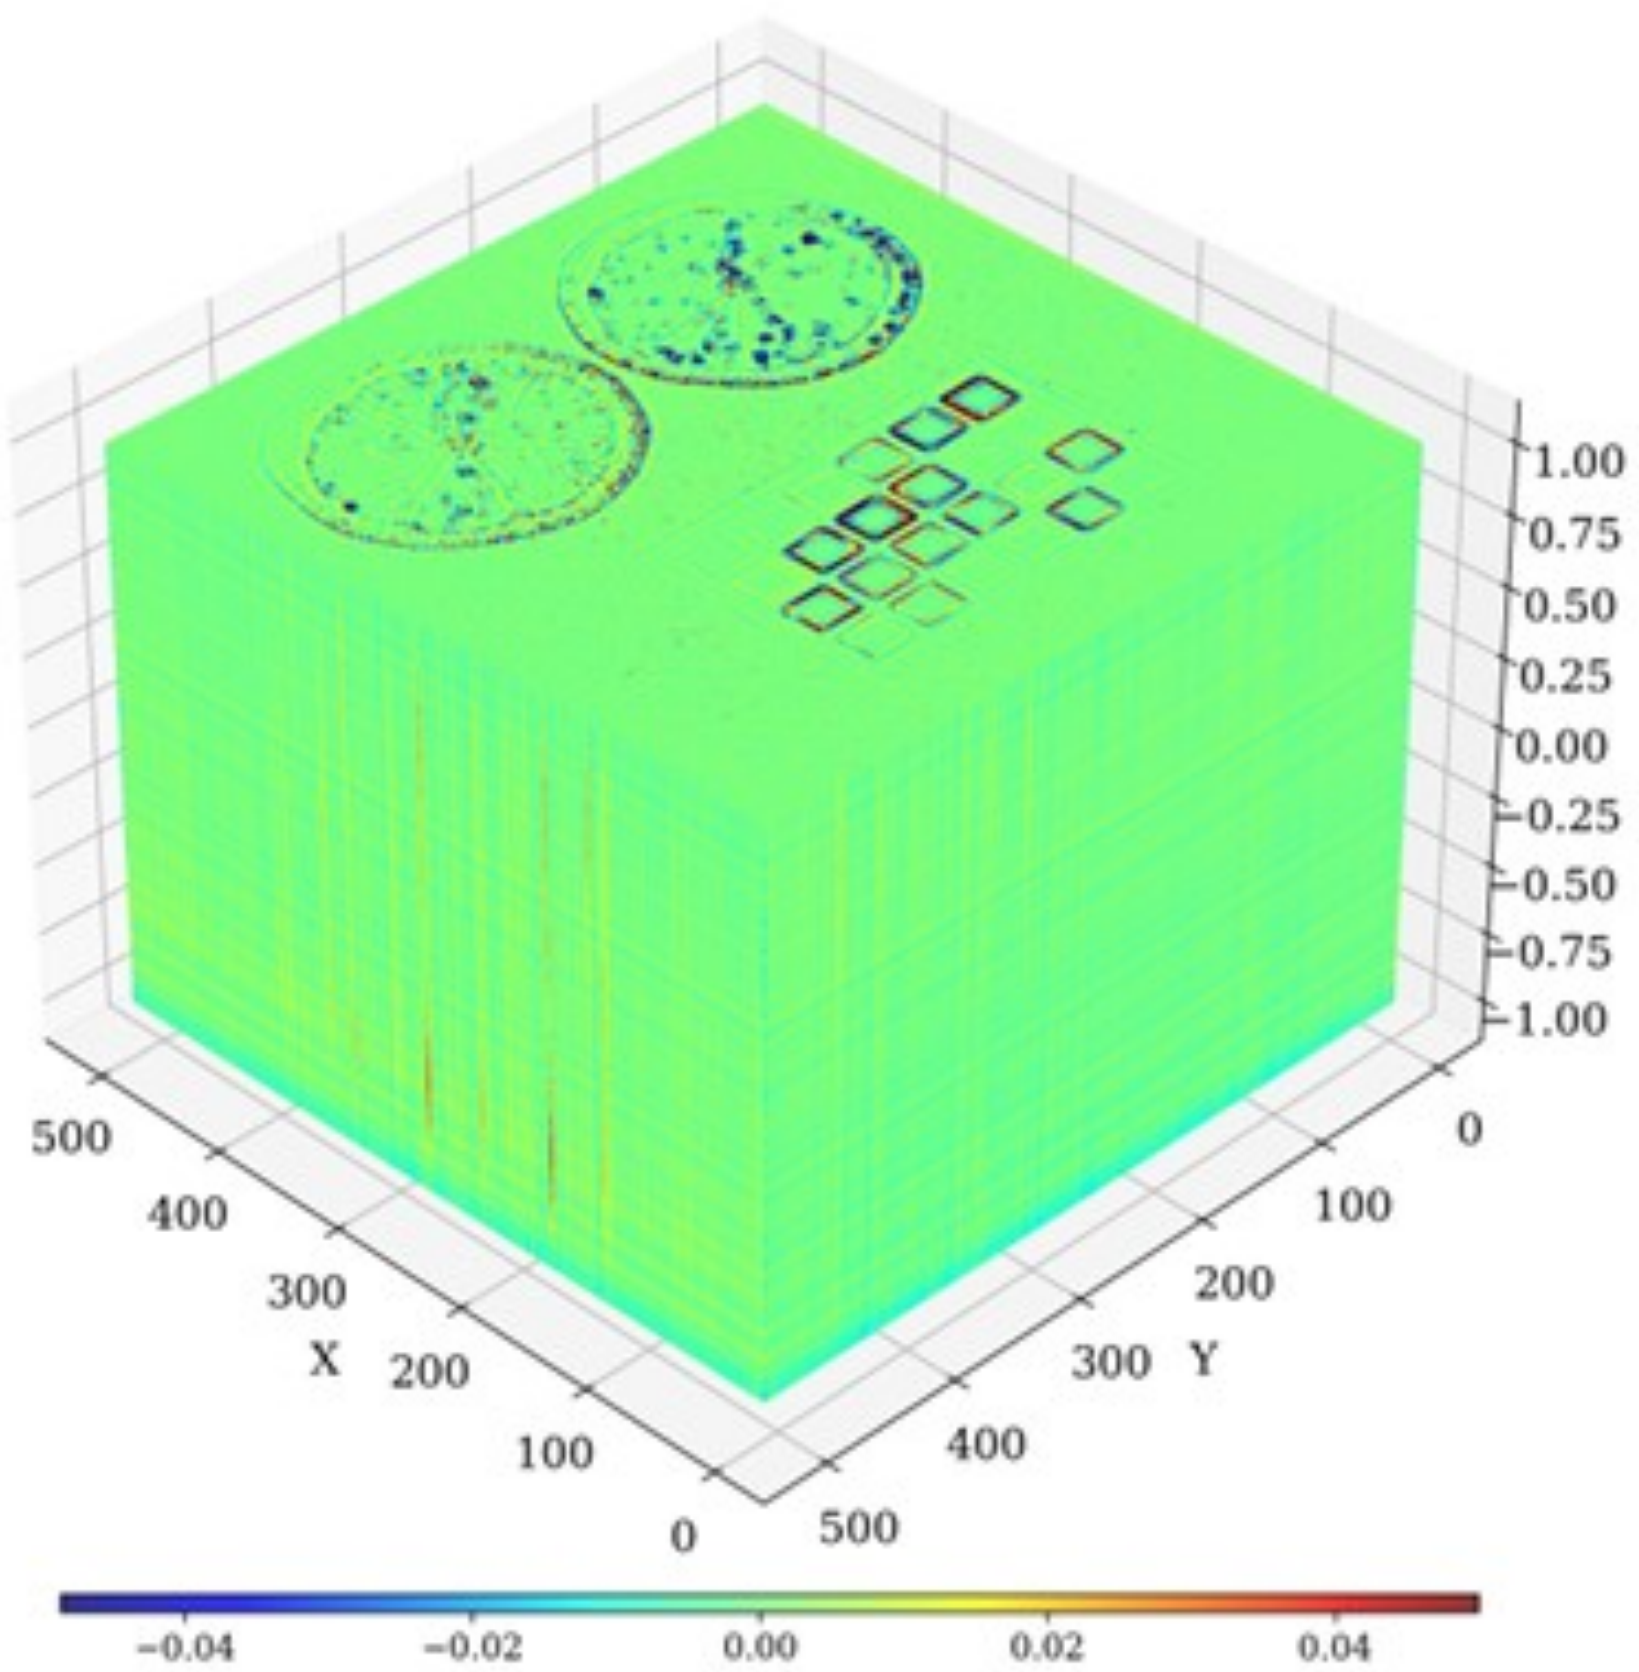

Supplement: supplementary_material [file vis_radiance_cave_x4.pdf › 6758_Physics-informed Neural Operator for Pansharpening_supplementary_material/vis_radiance_cave_x4.pdf]

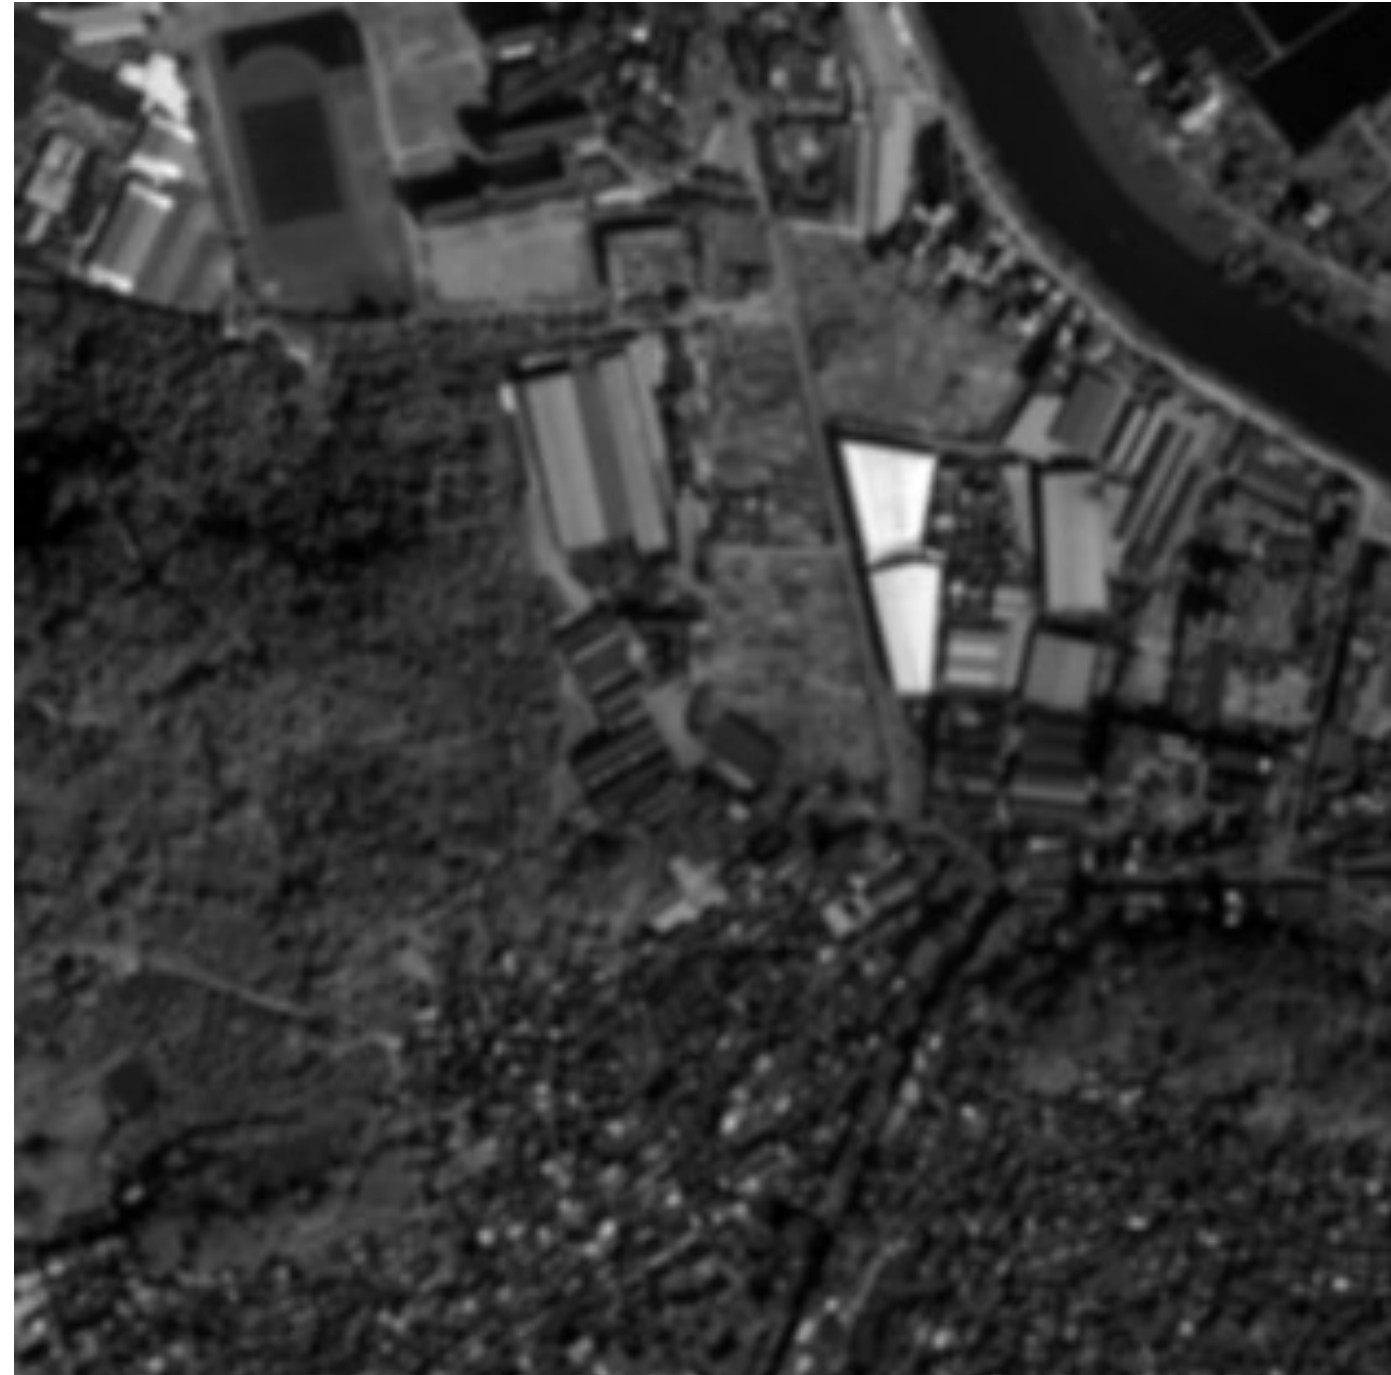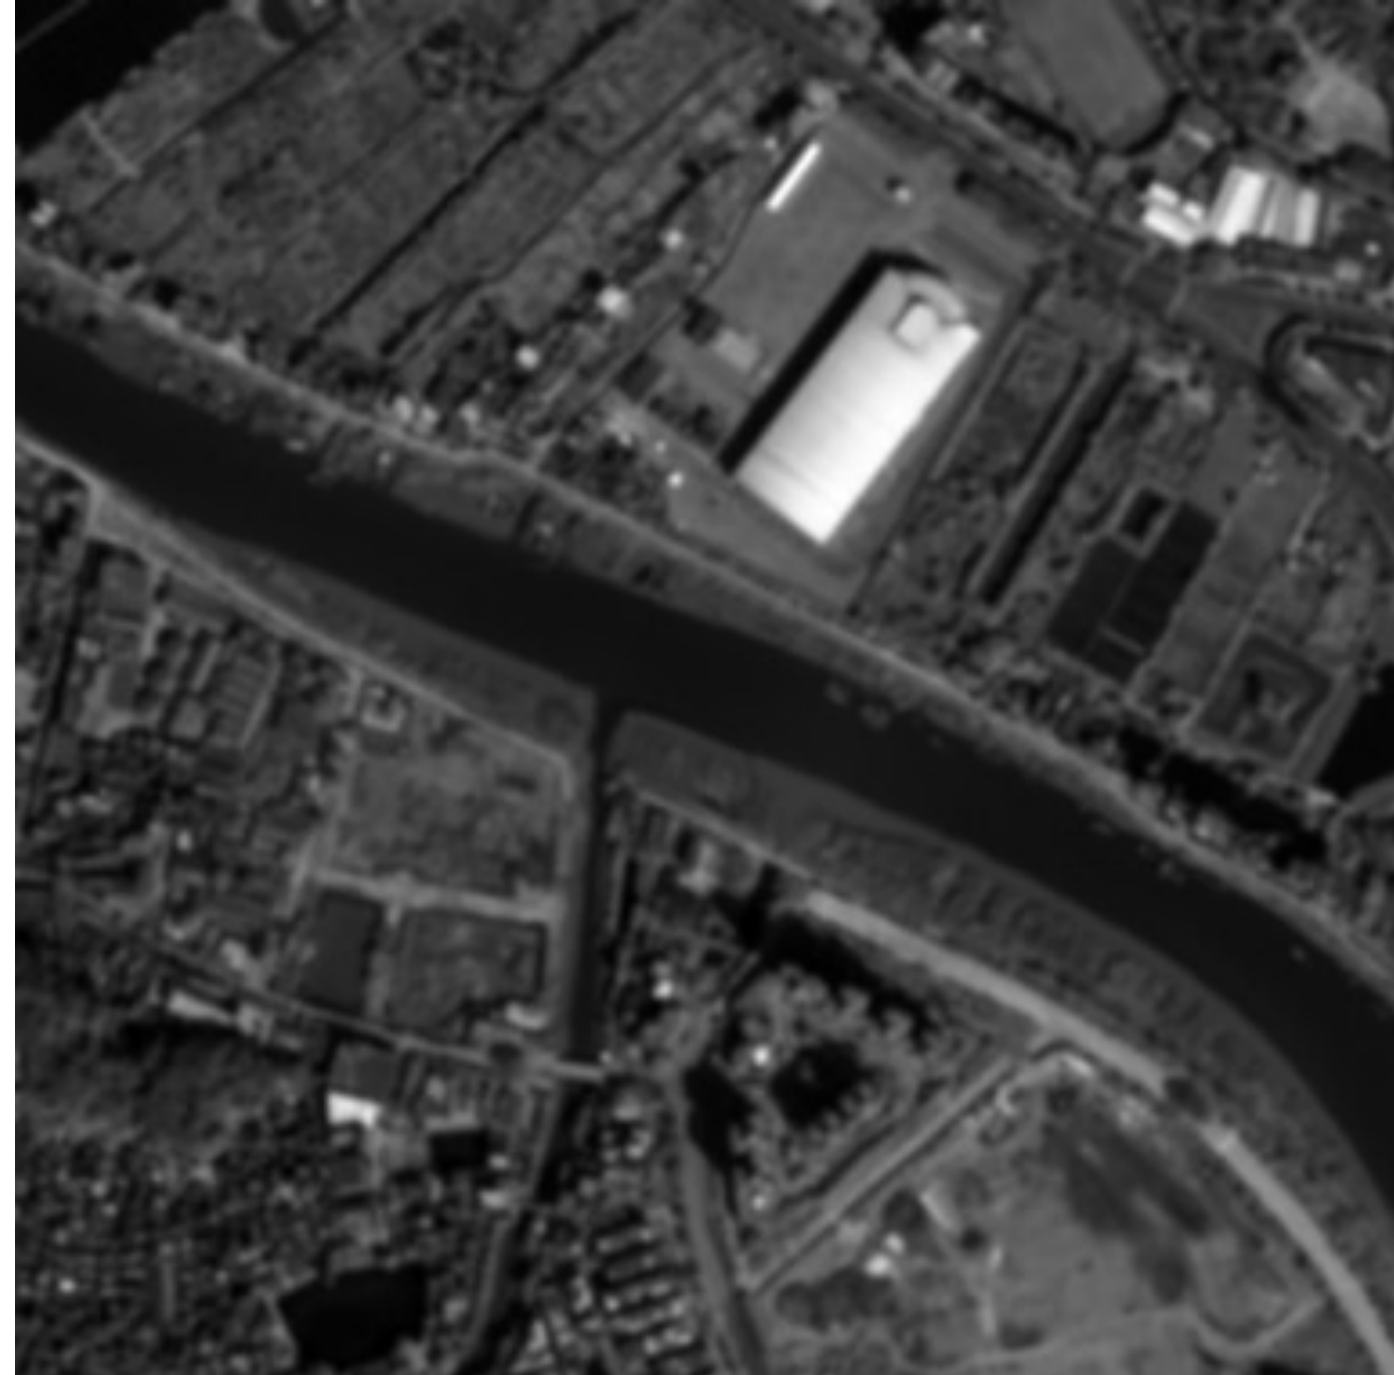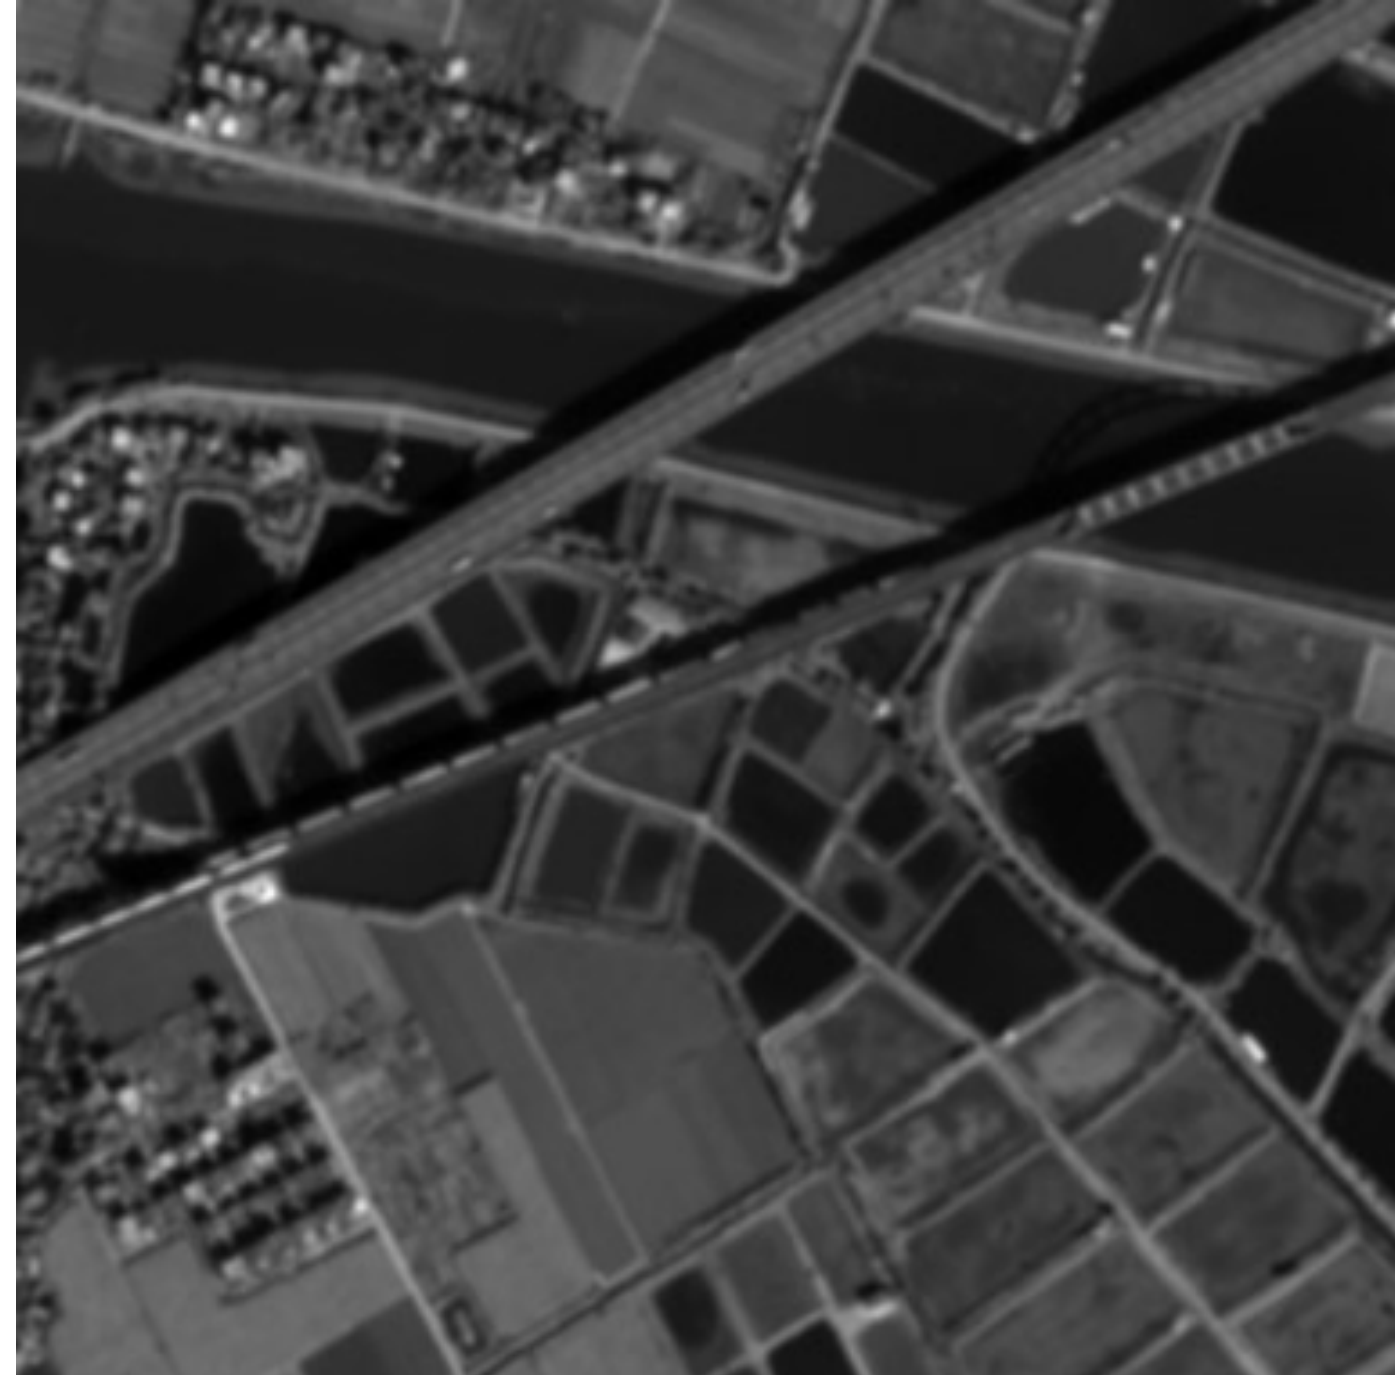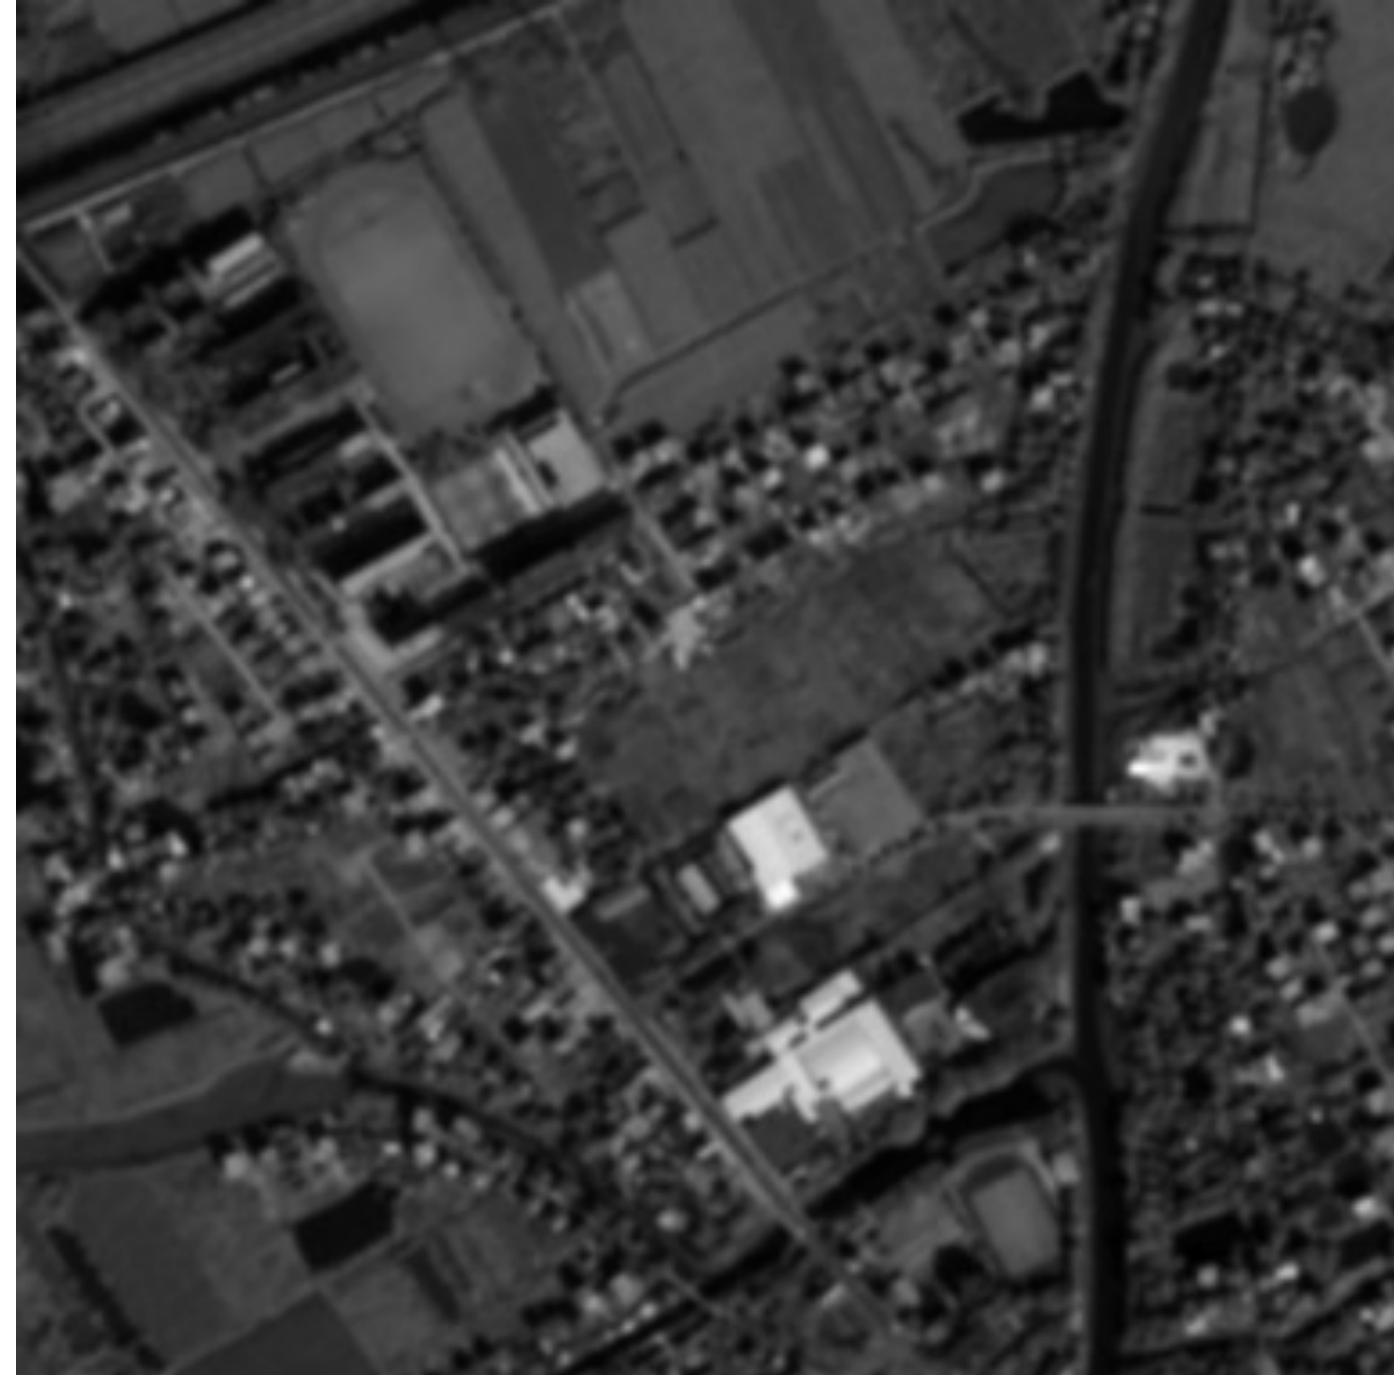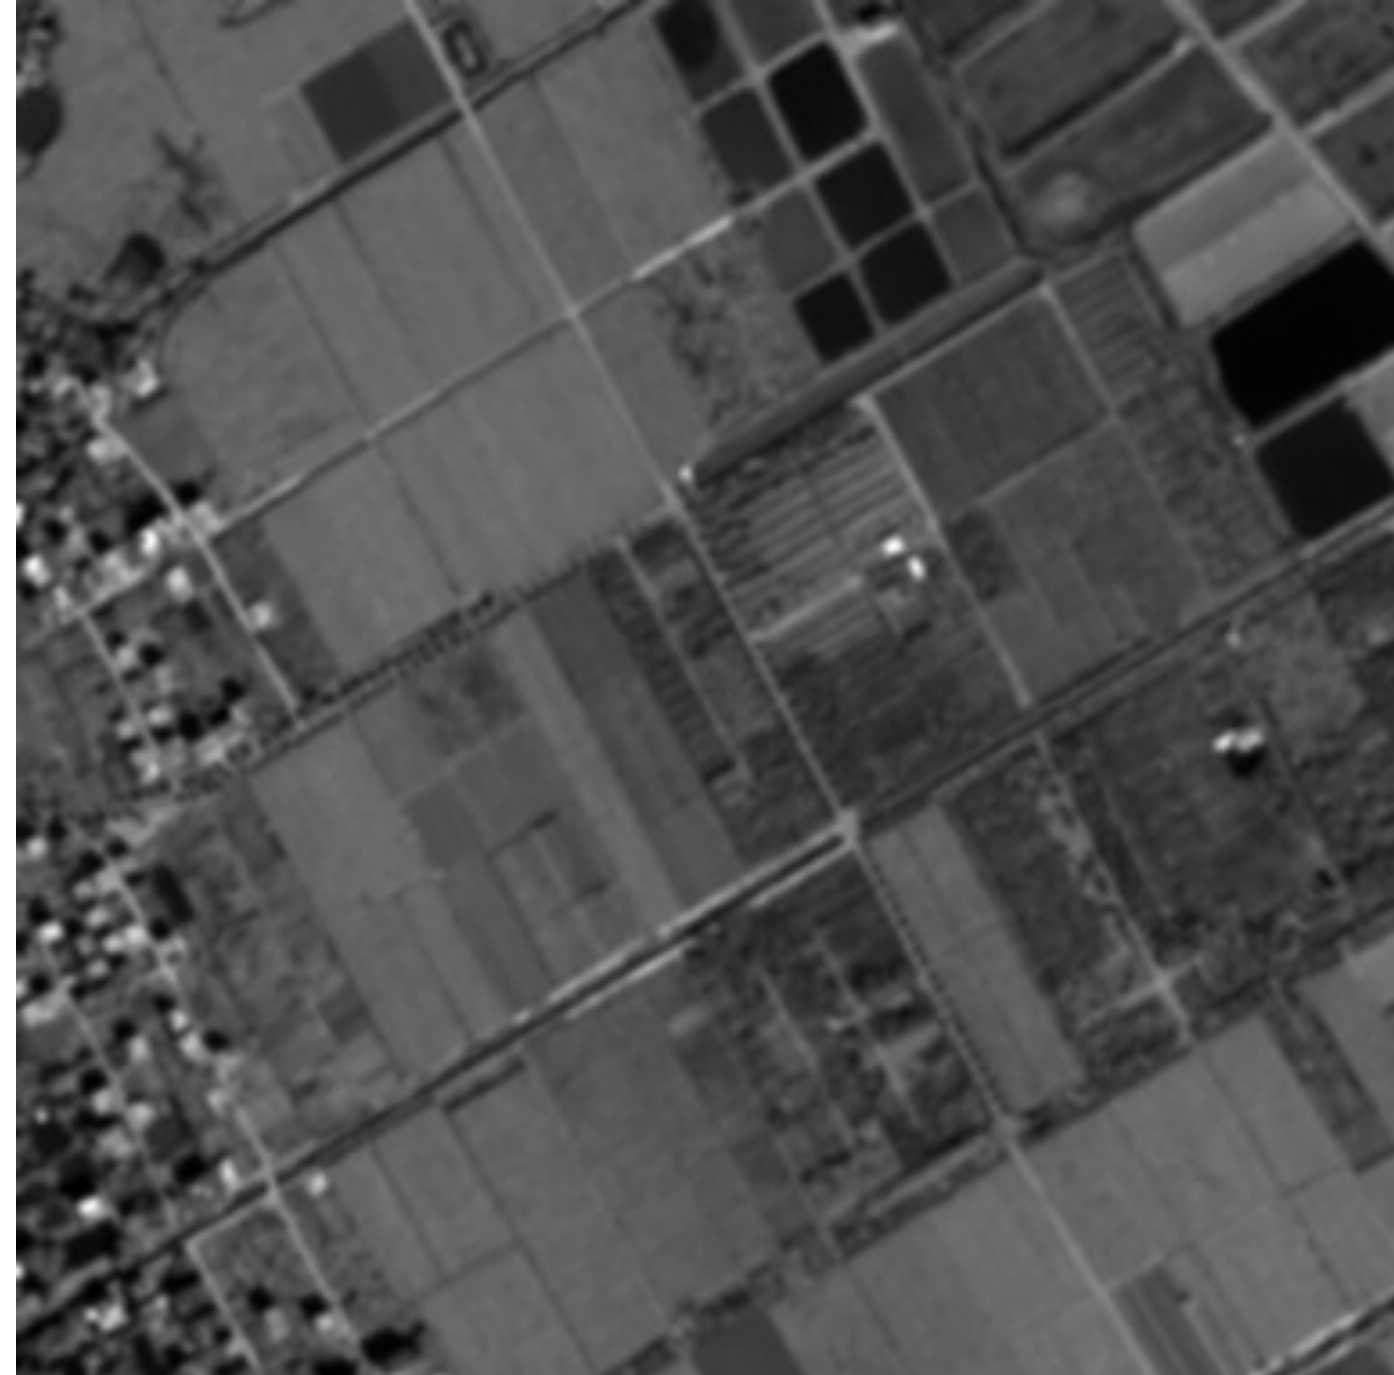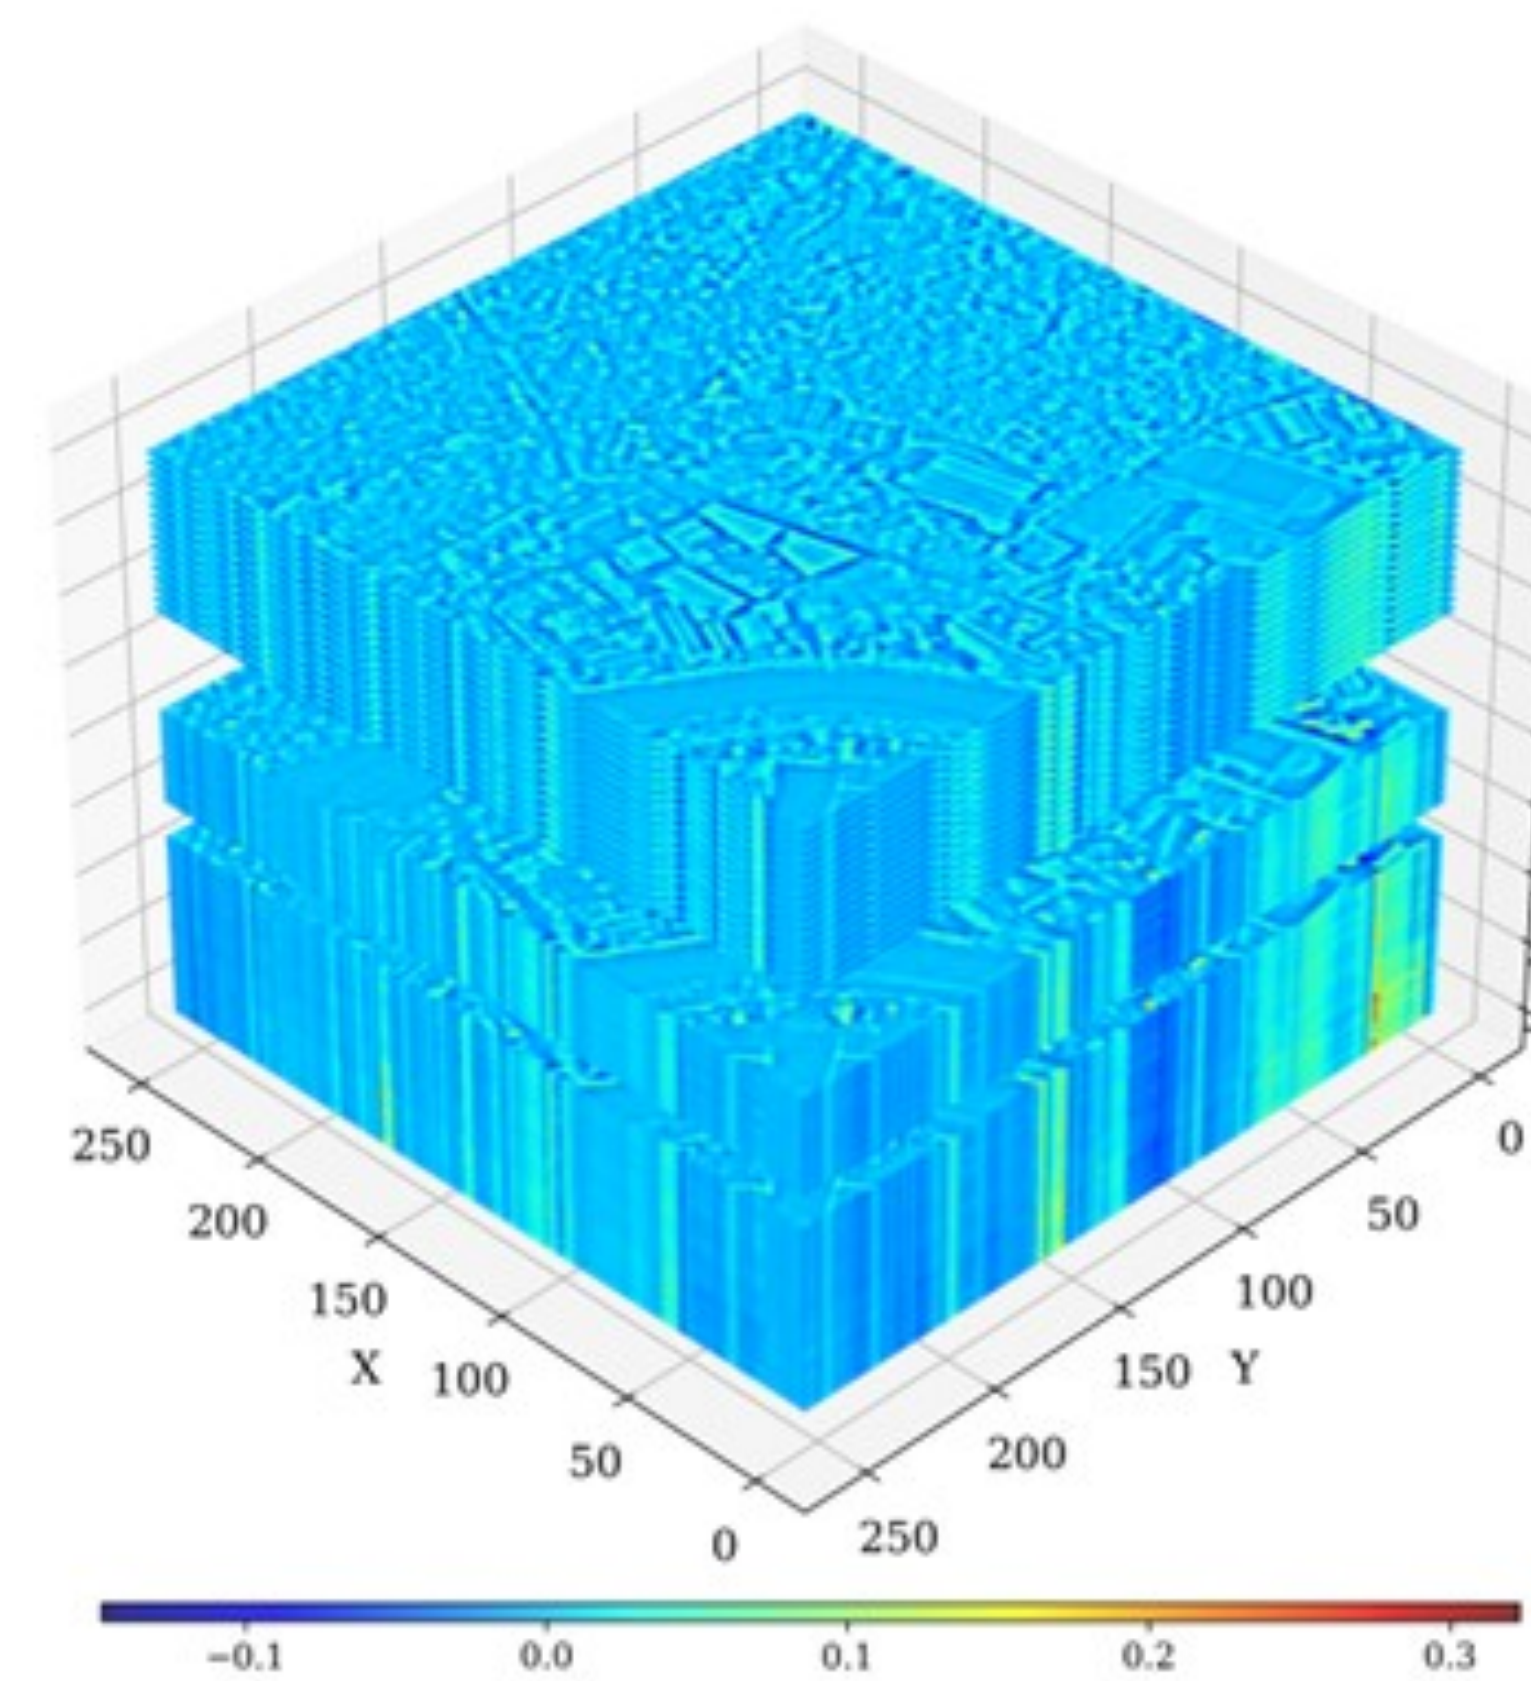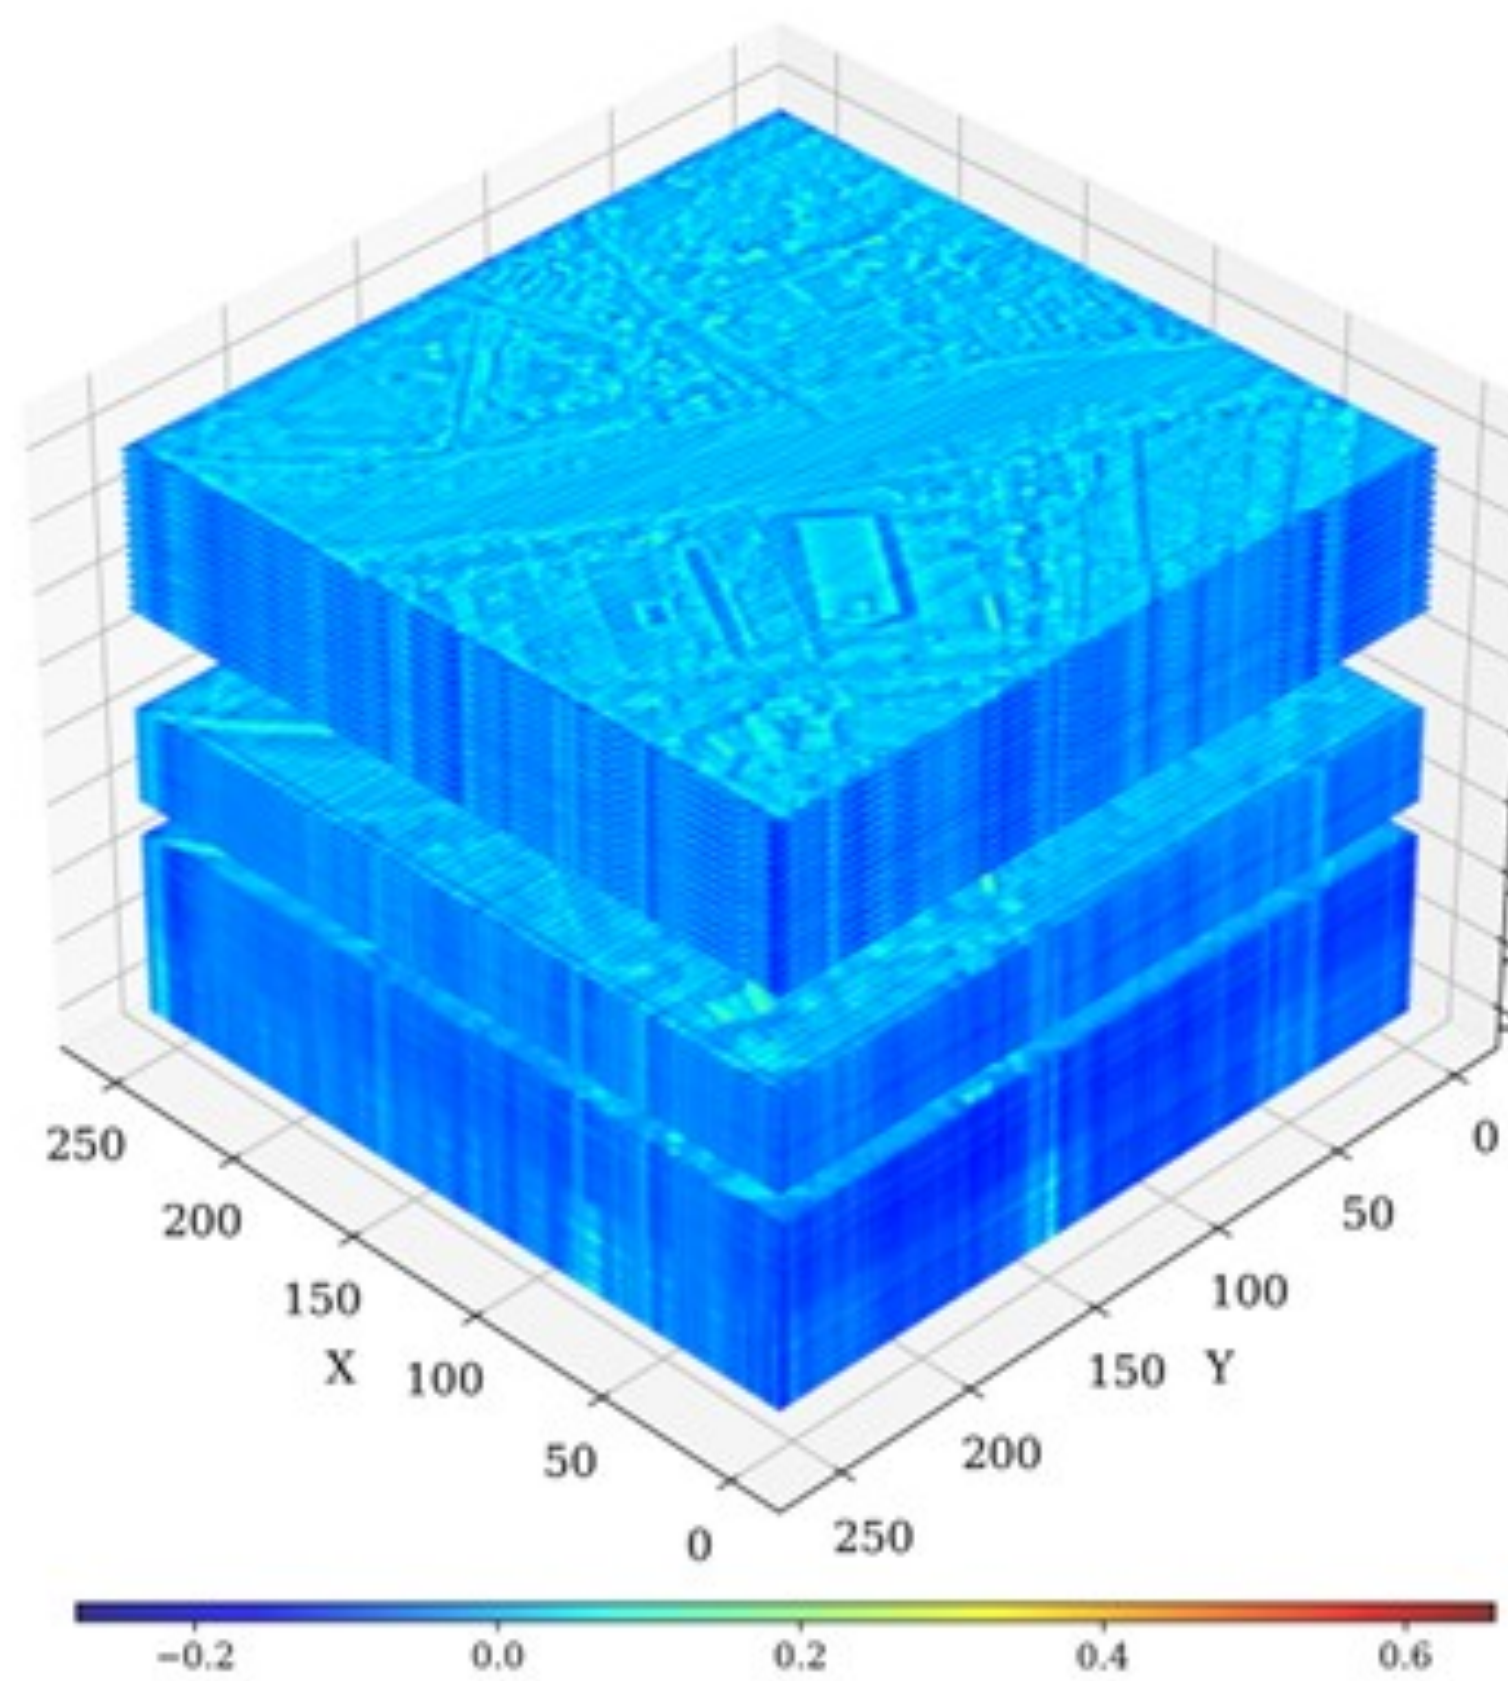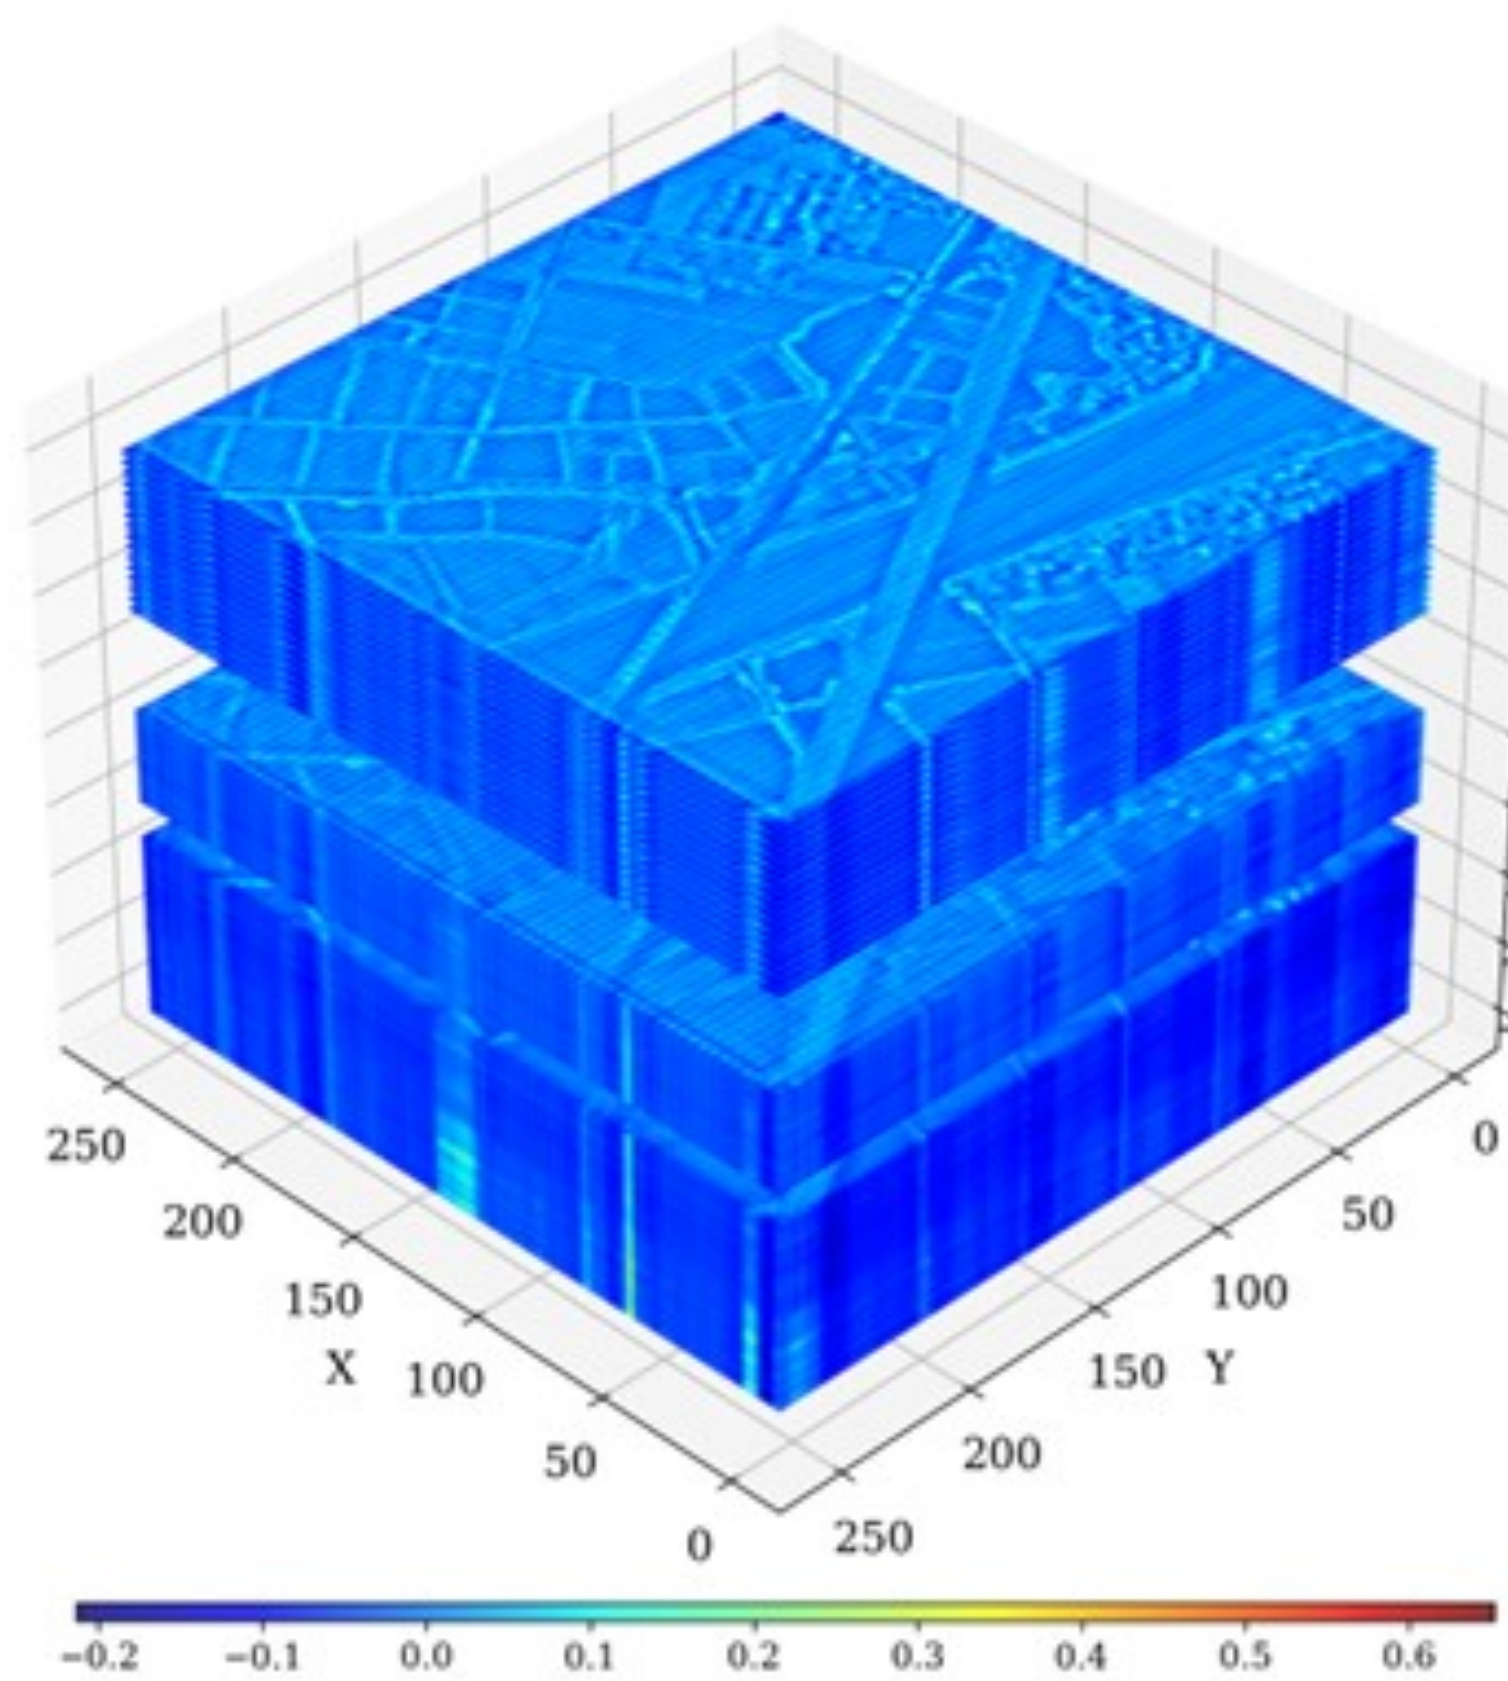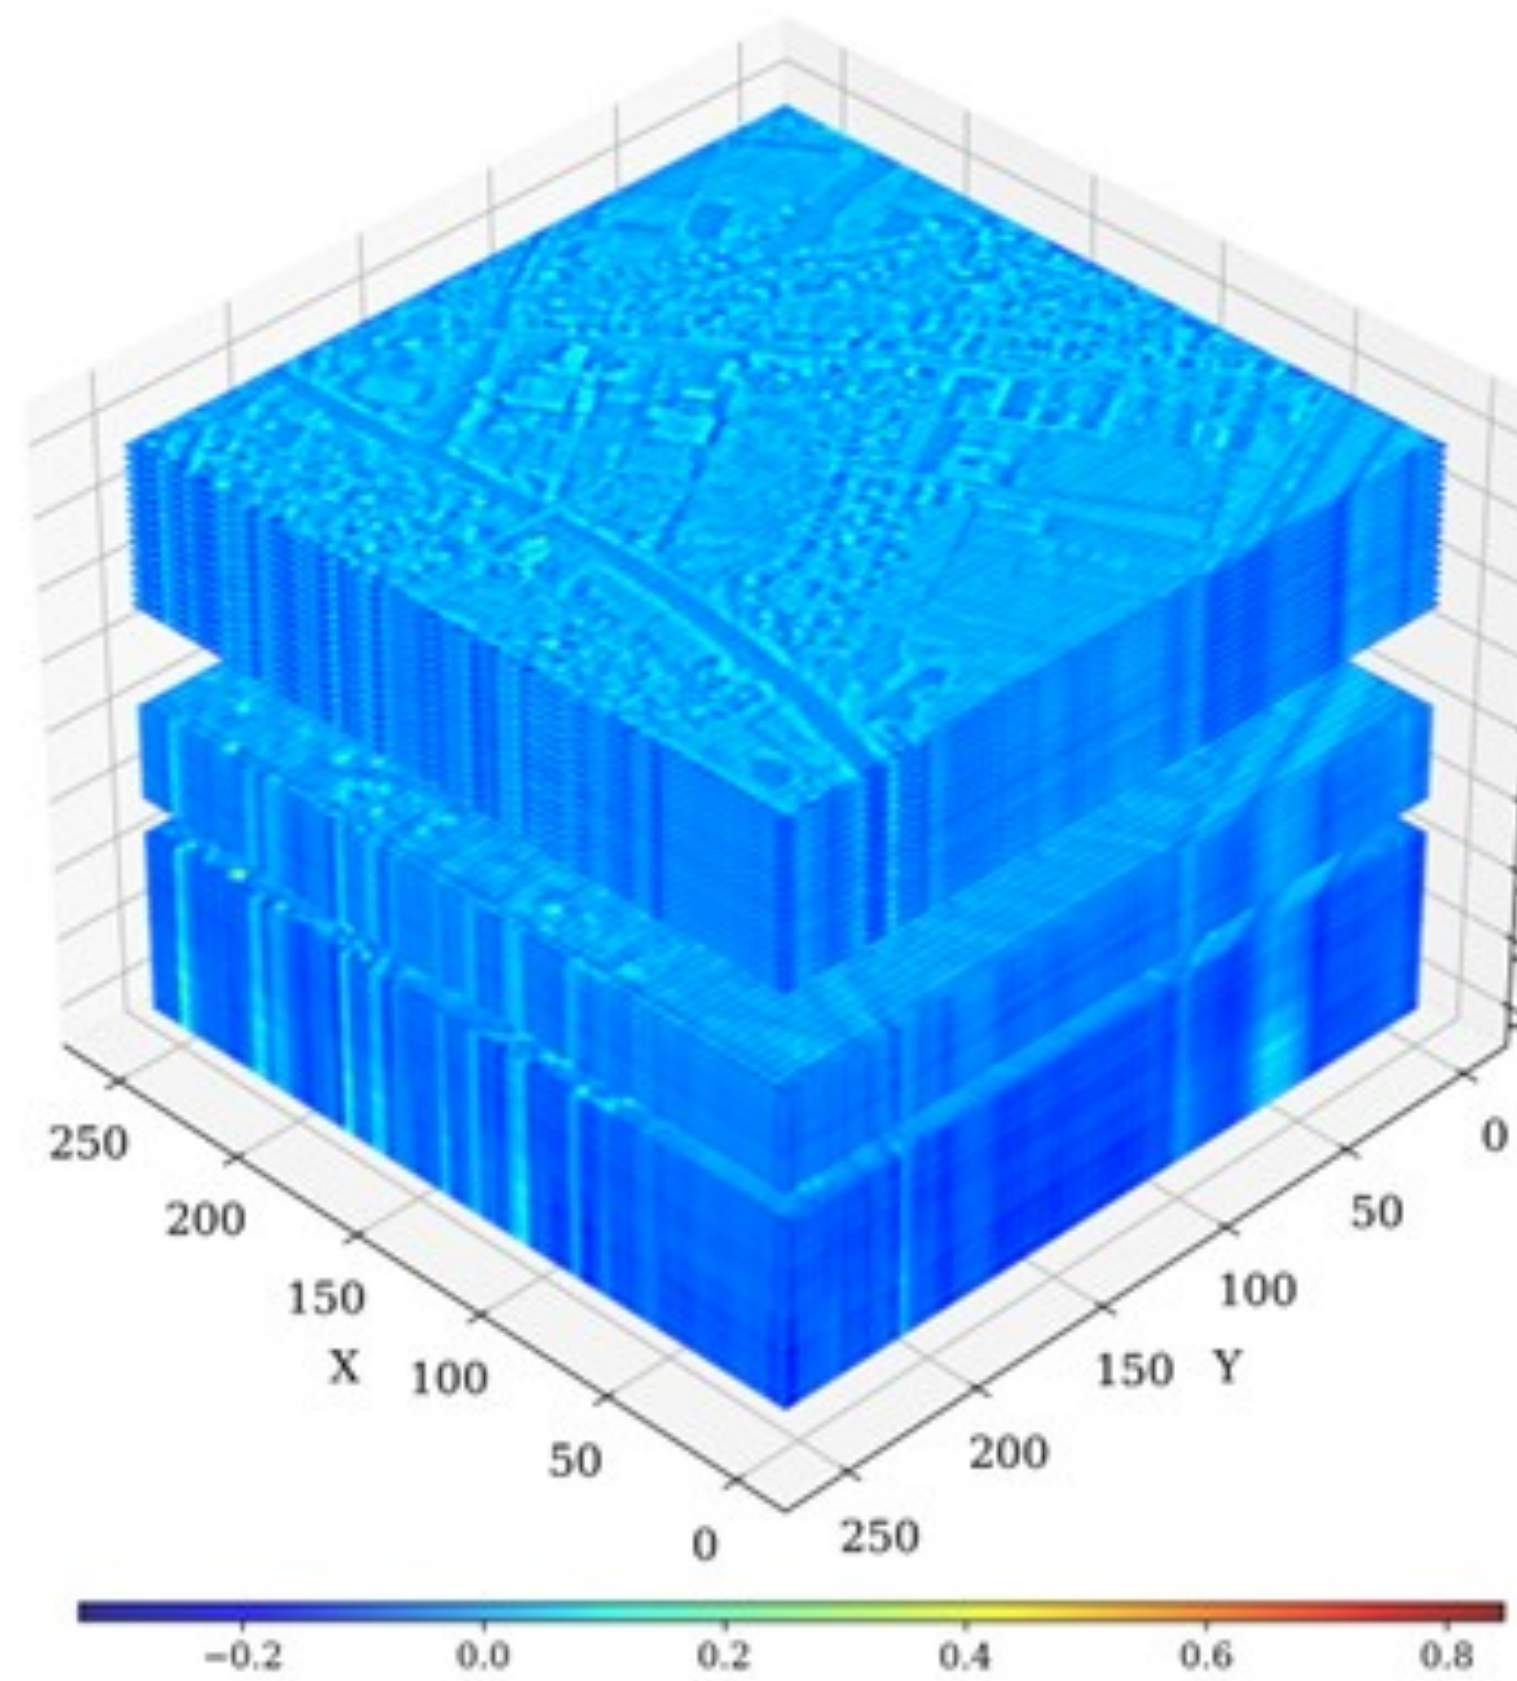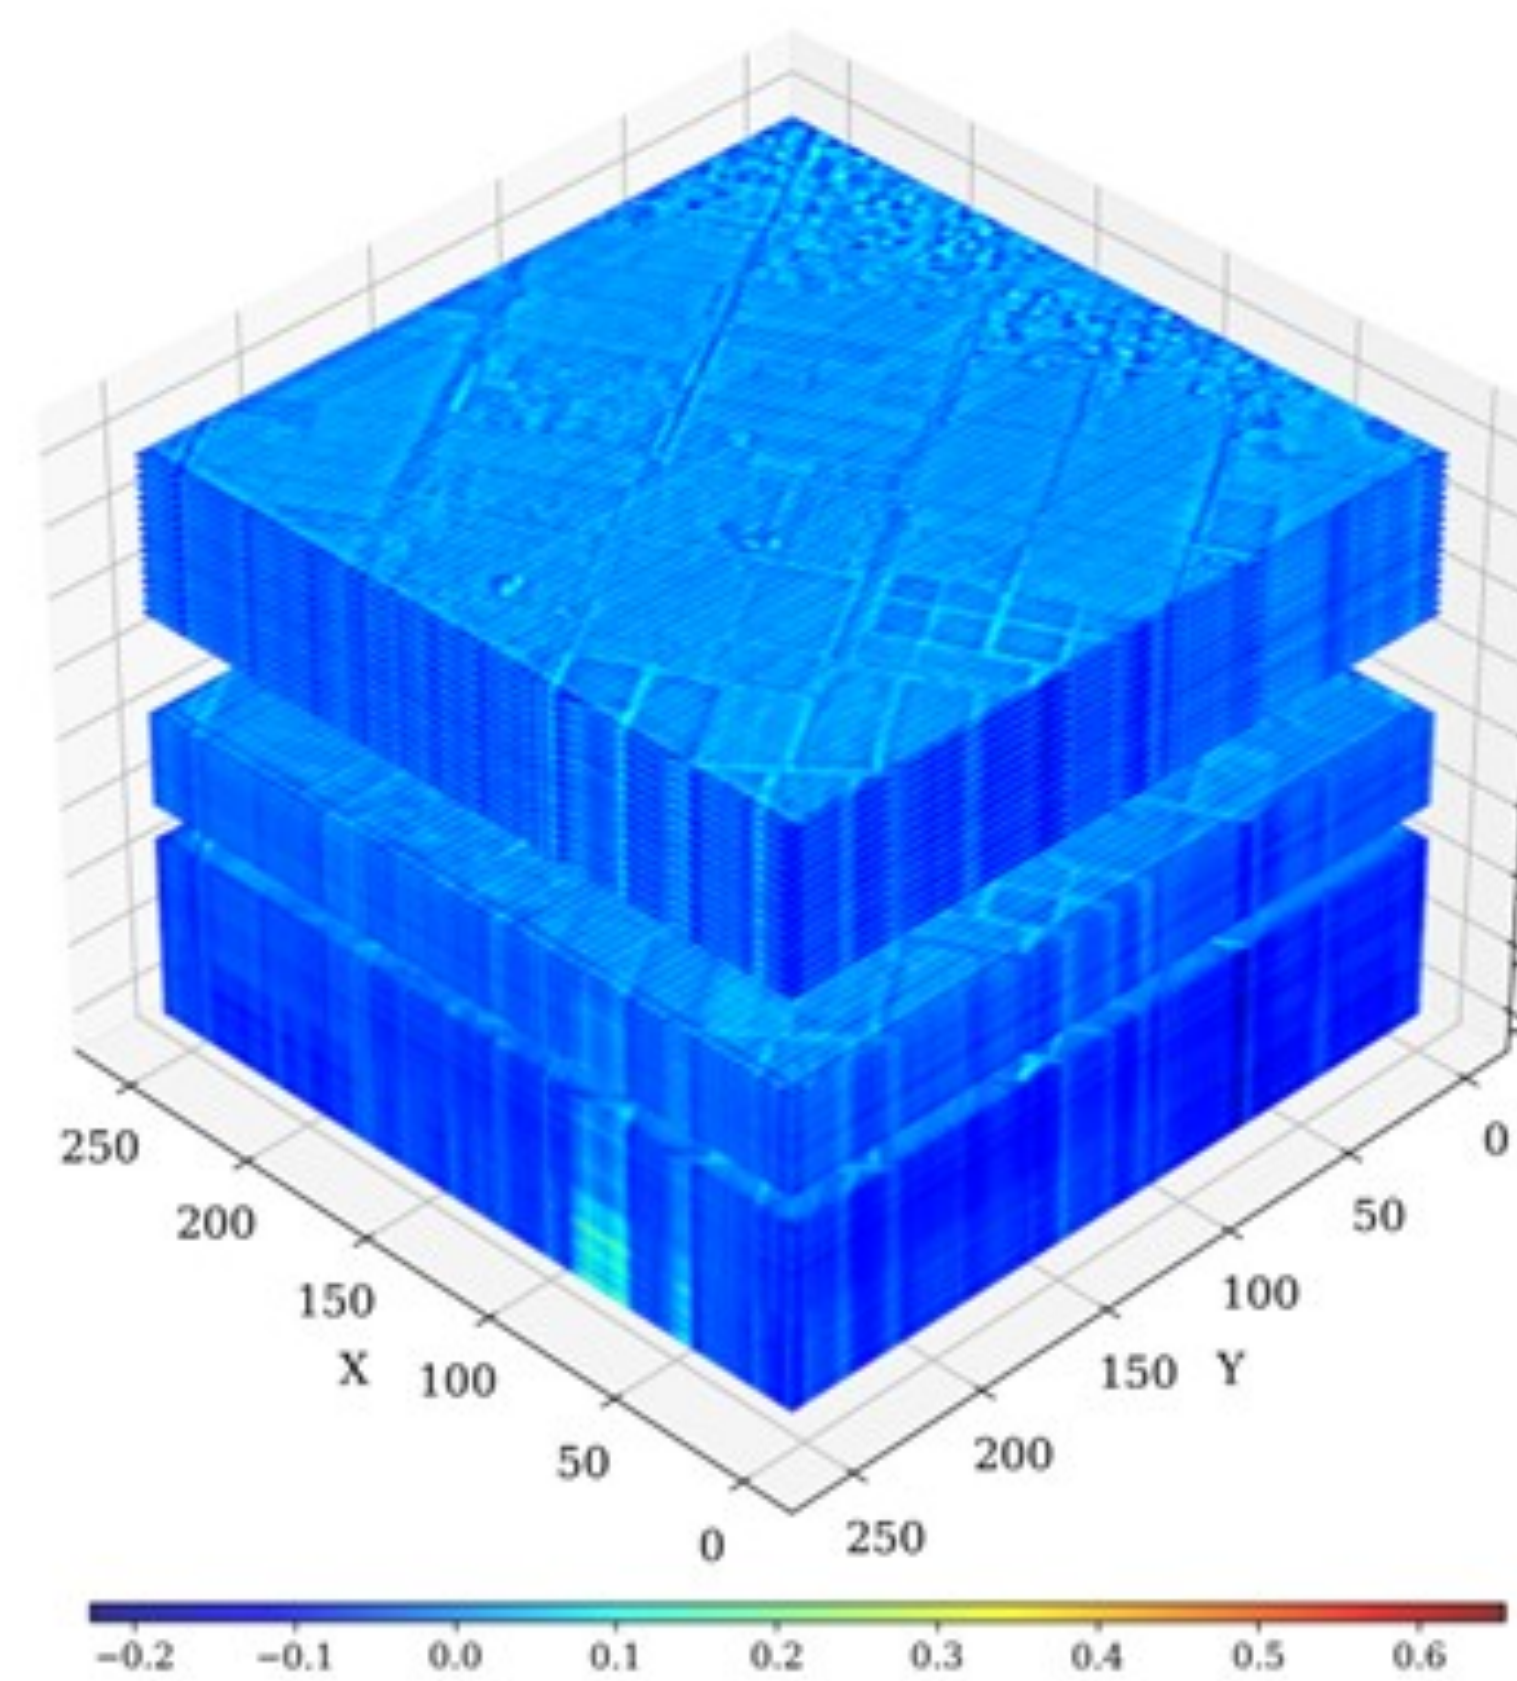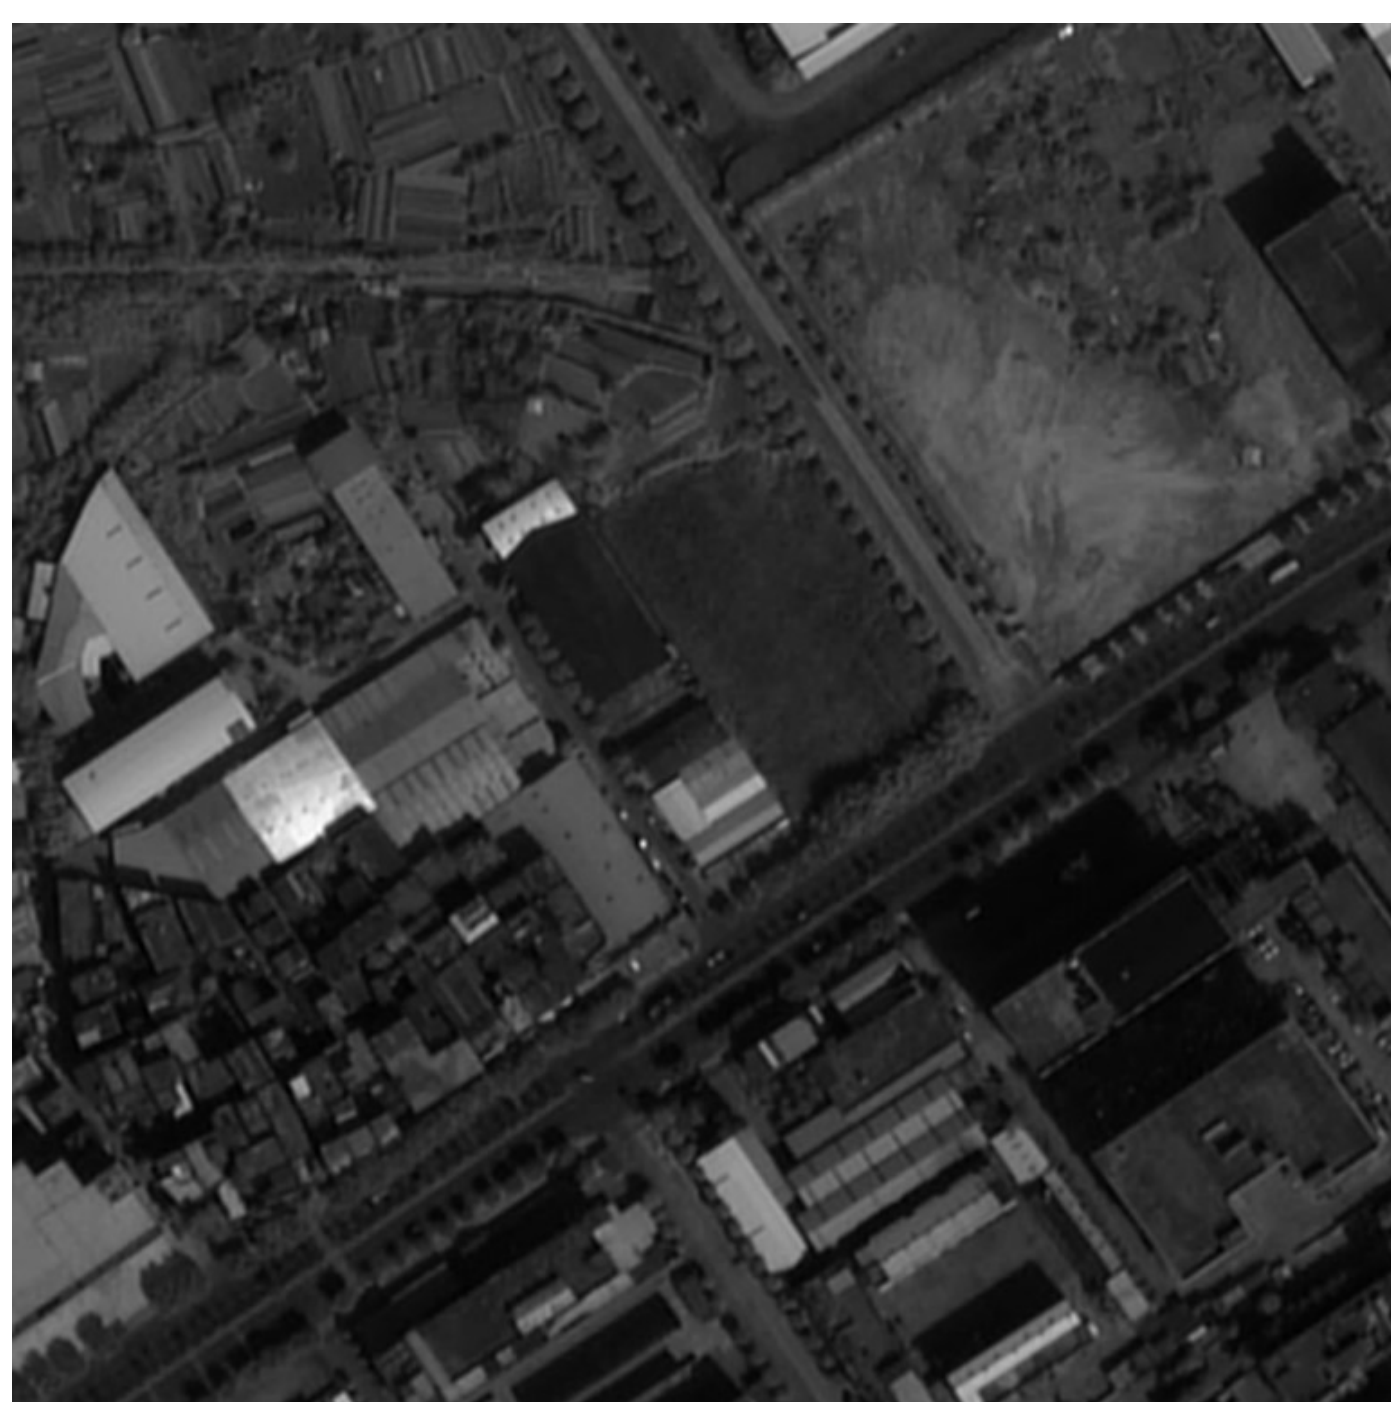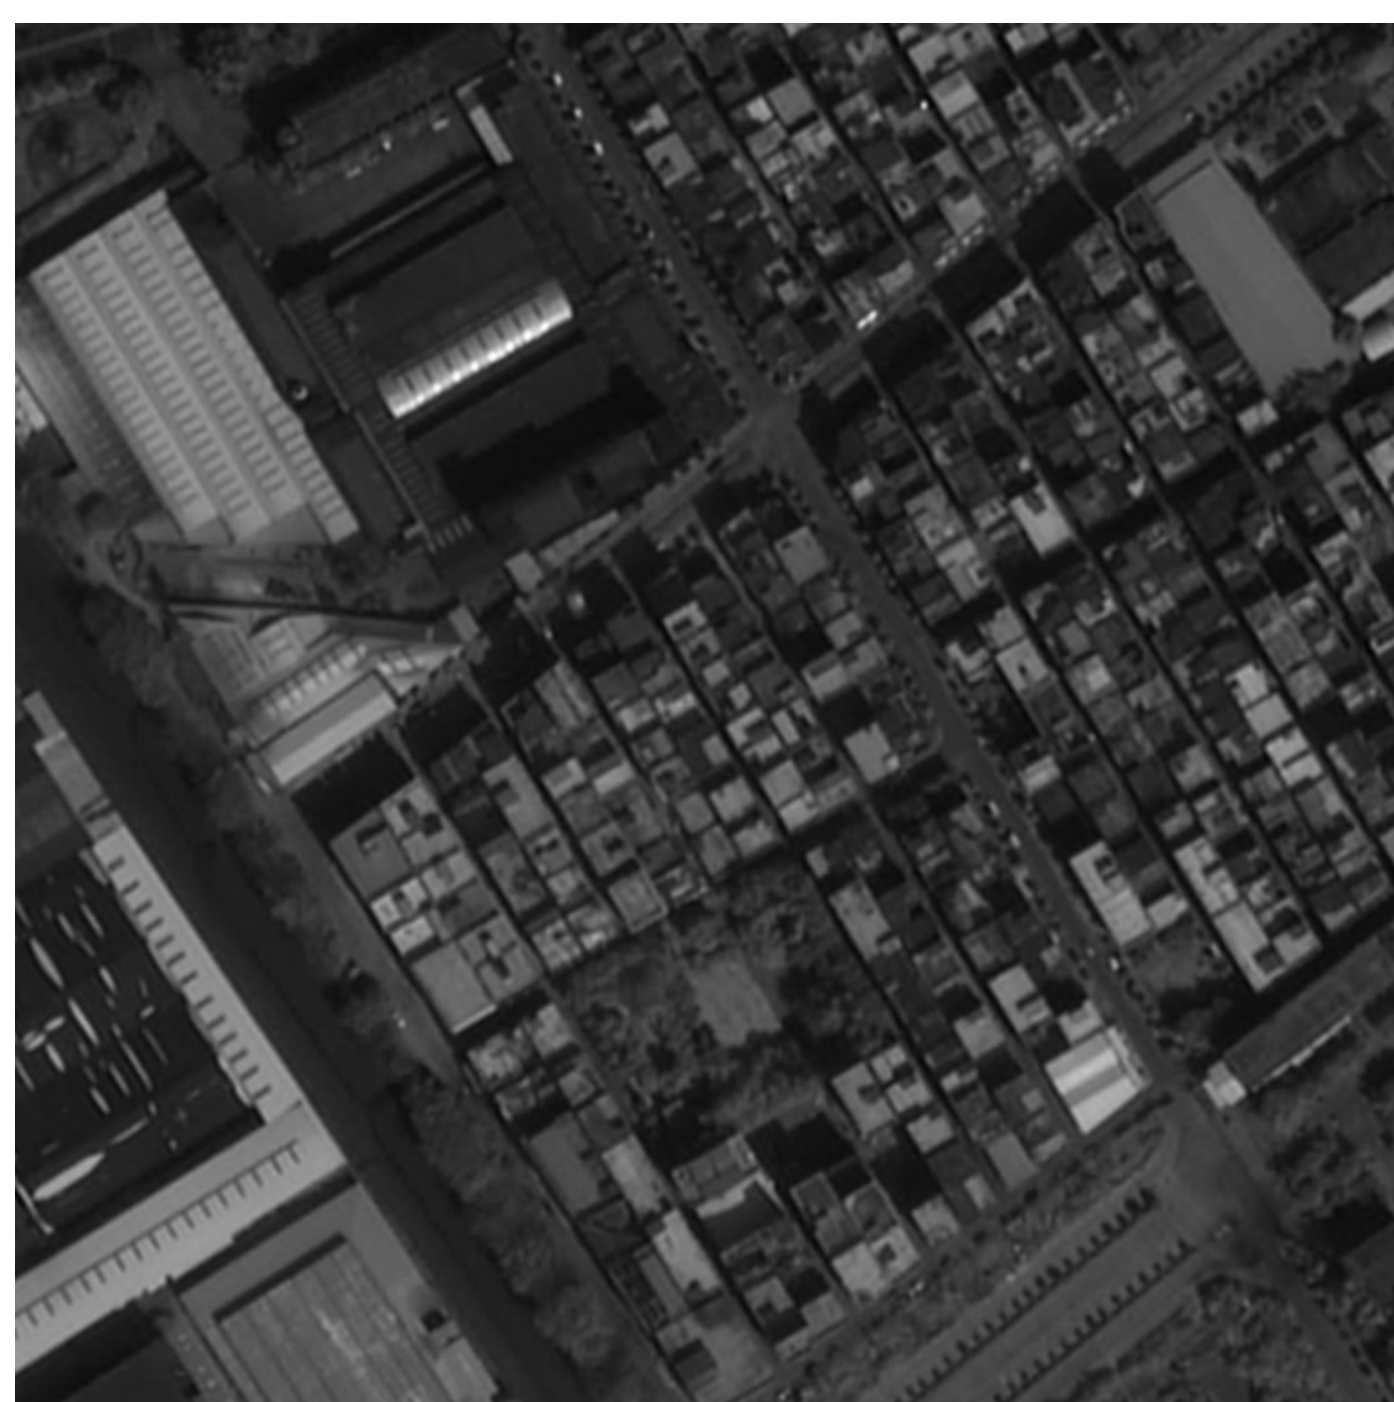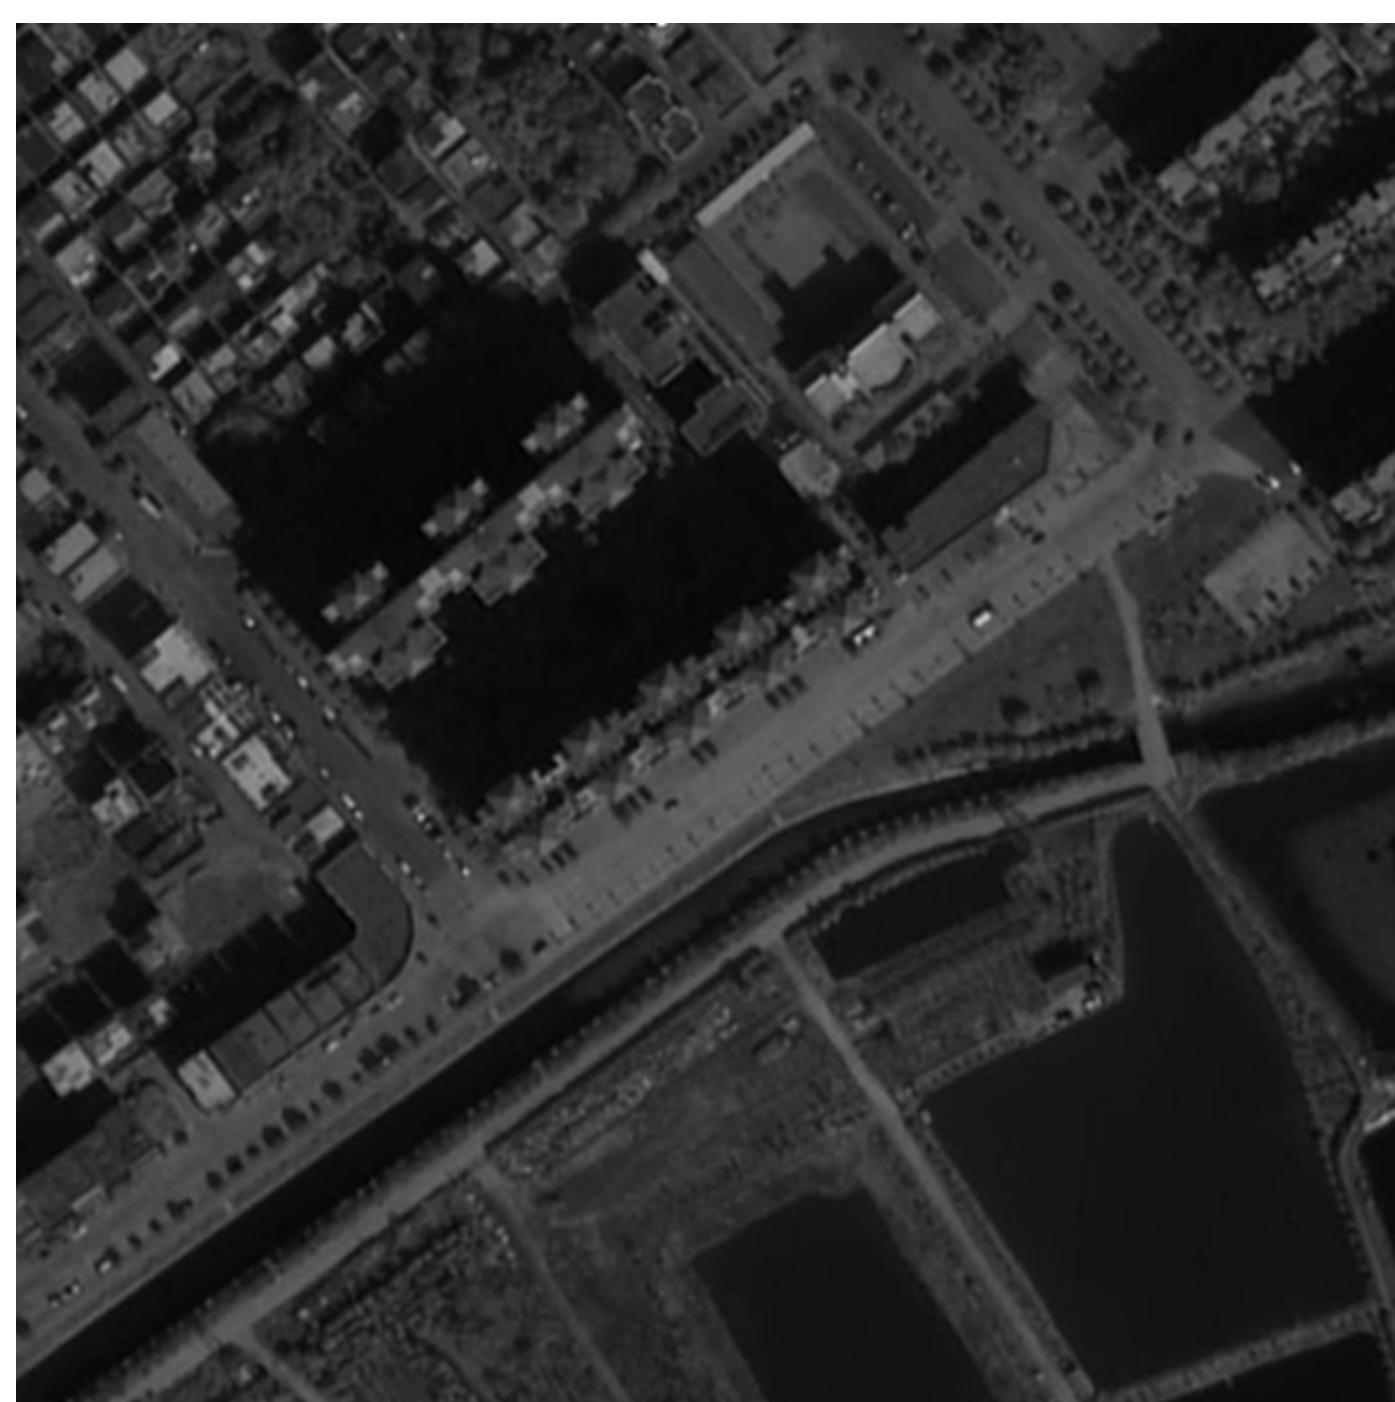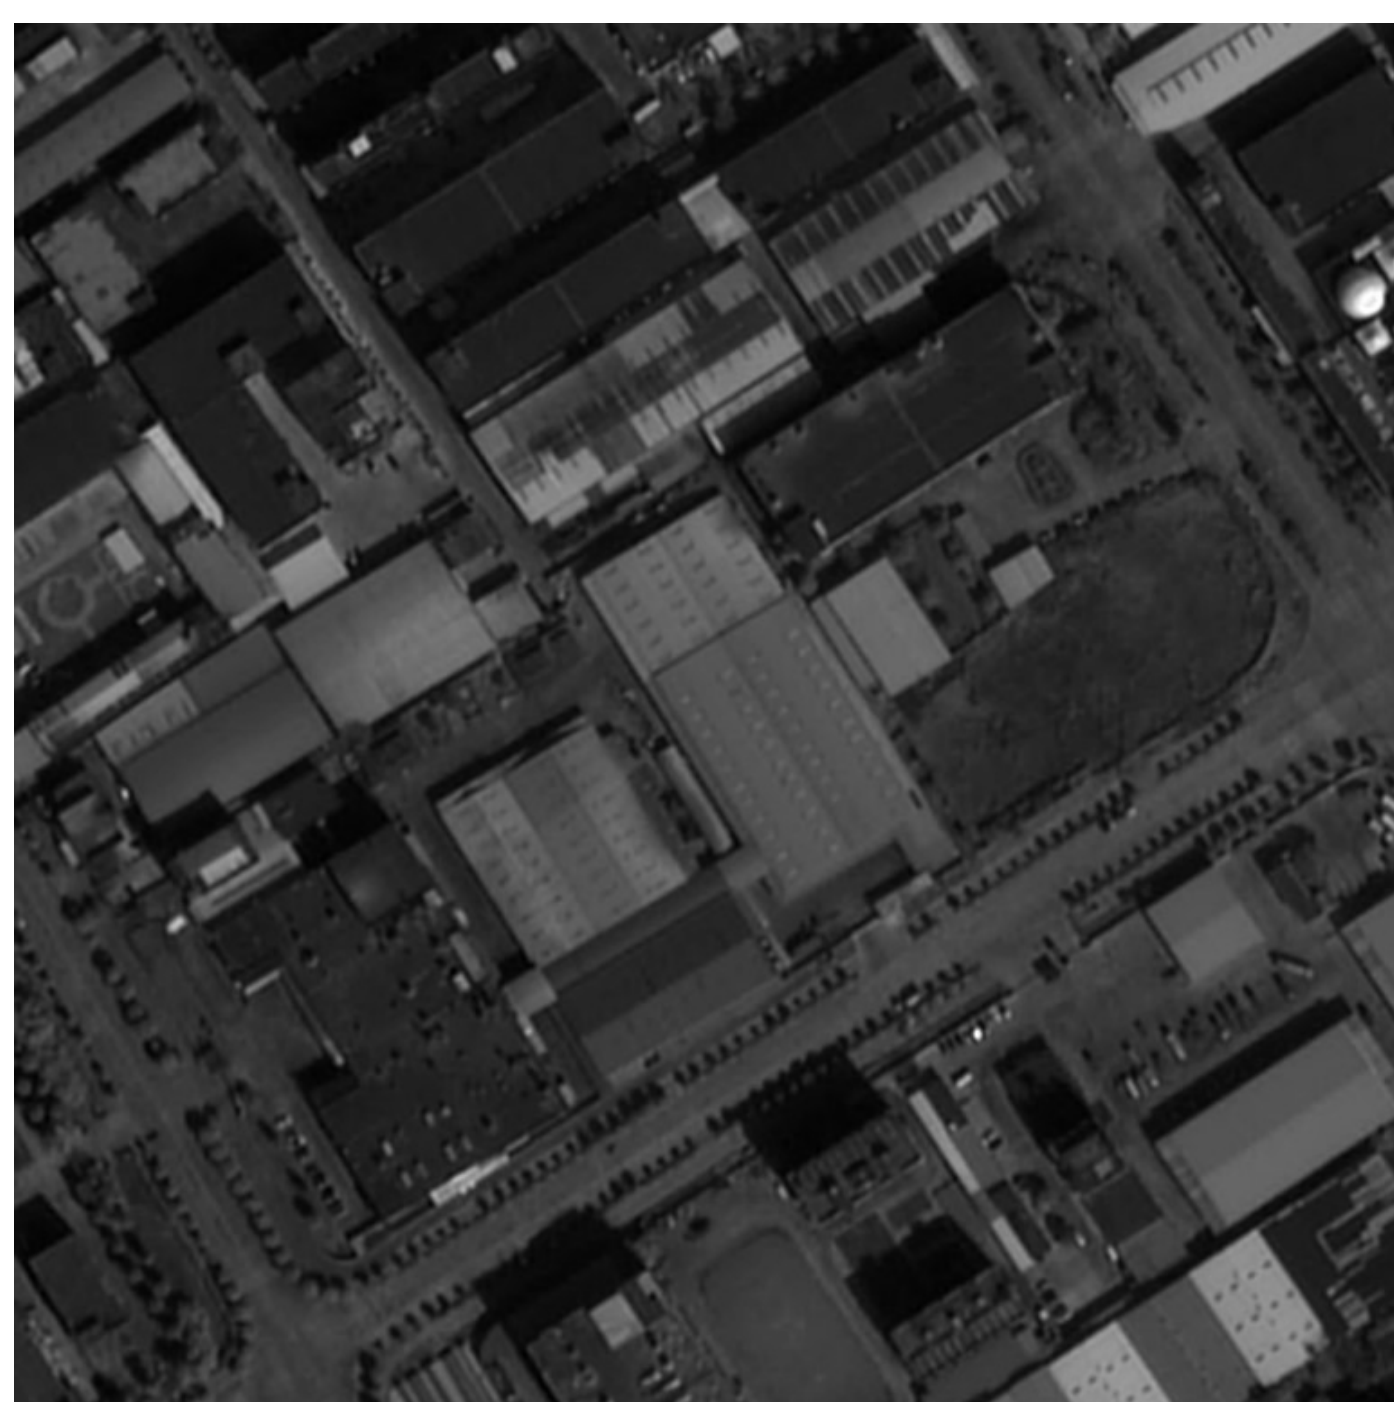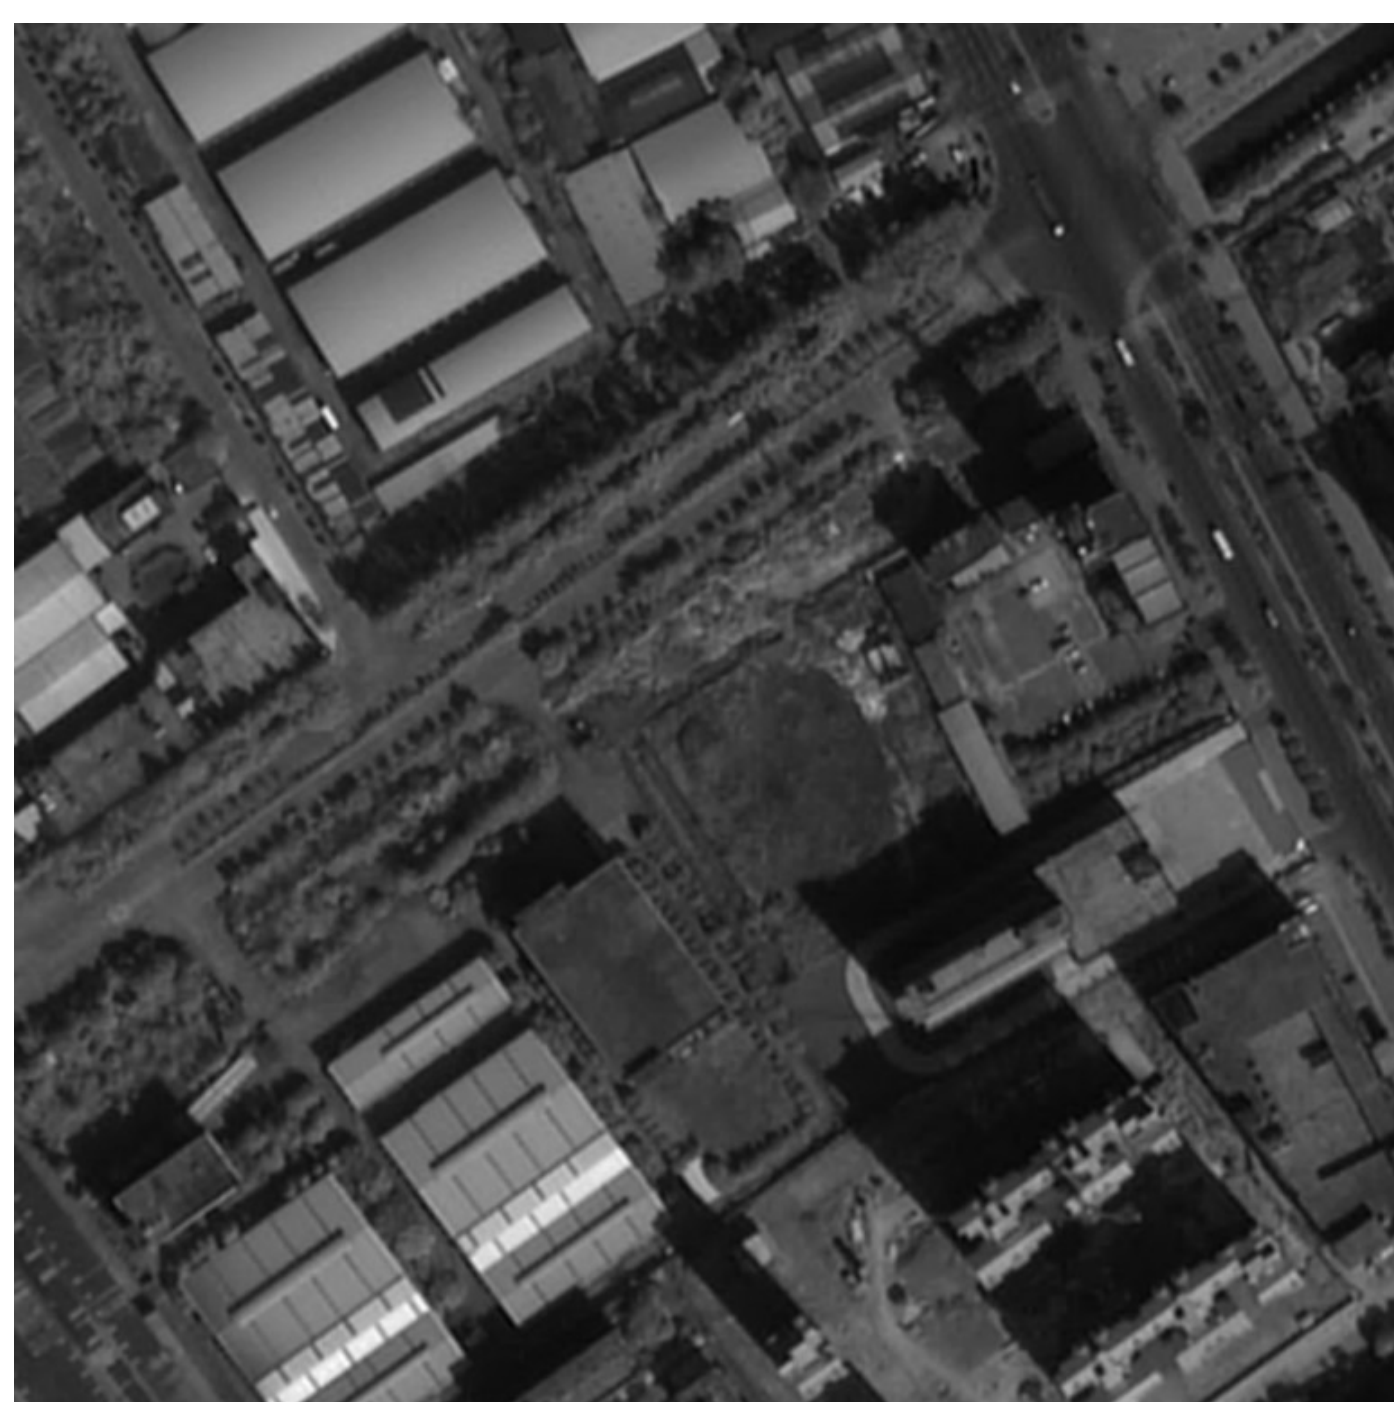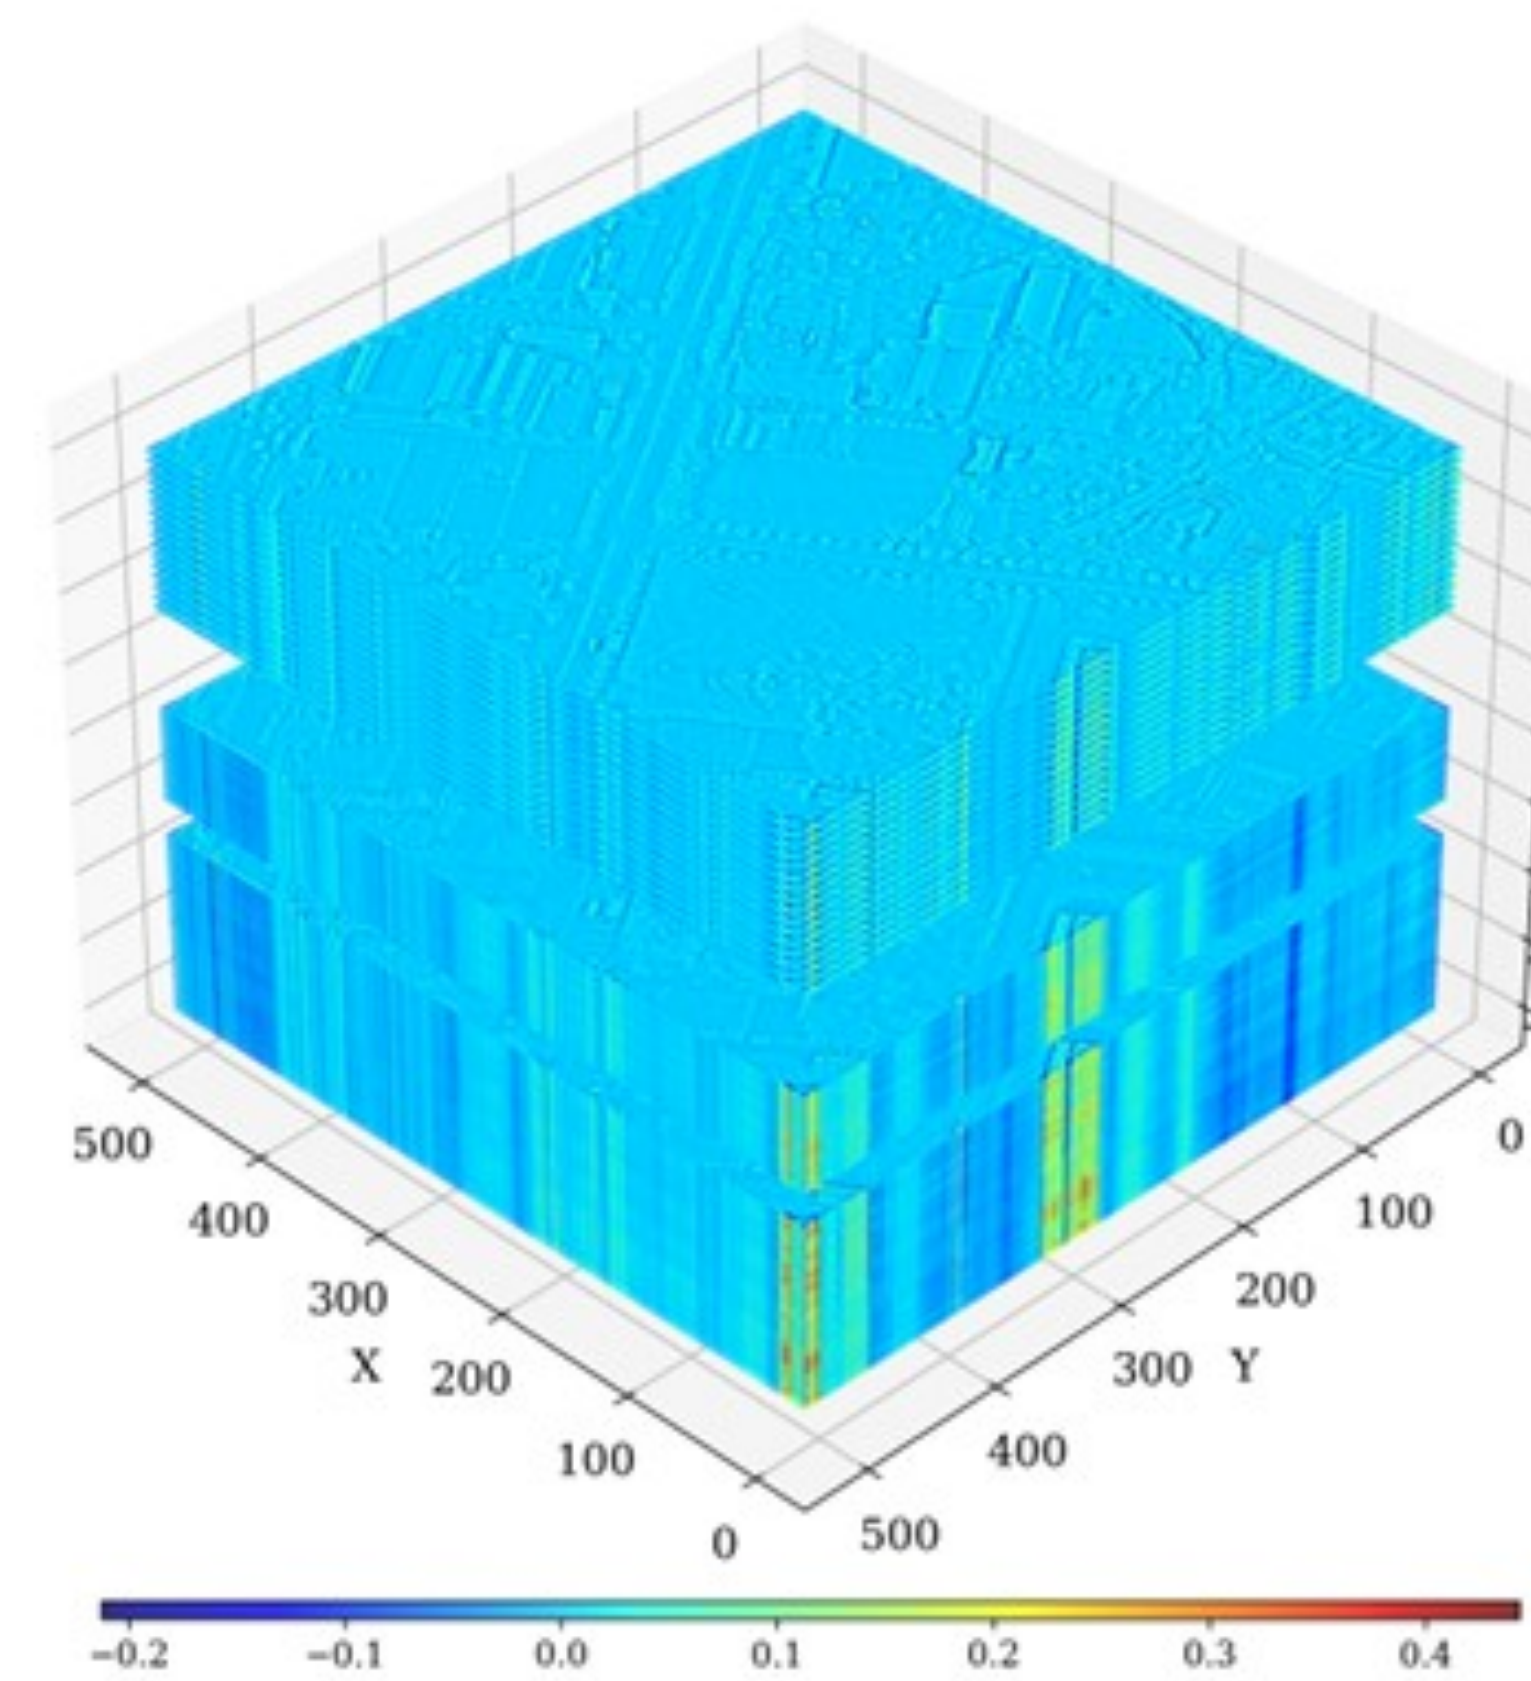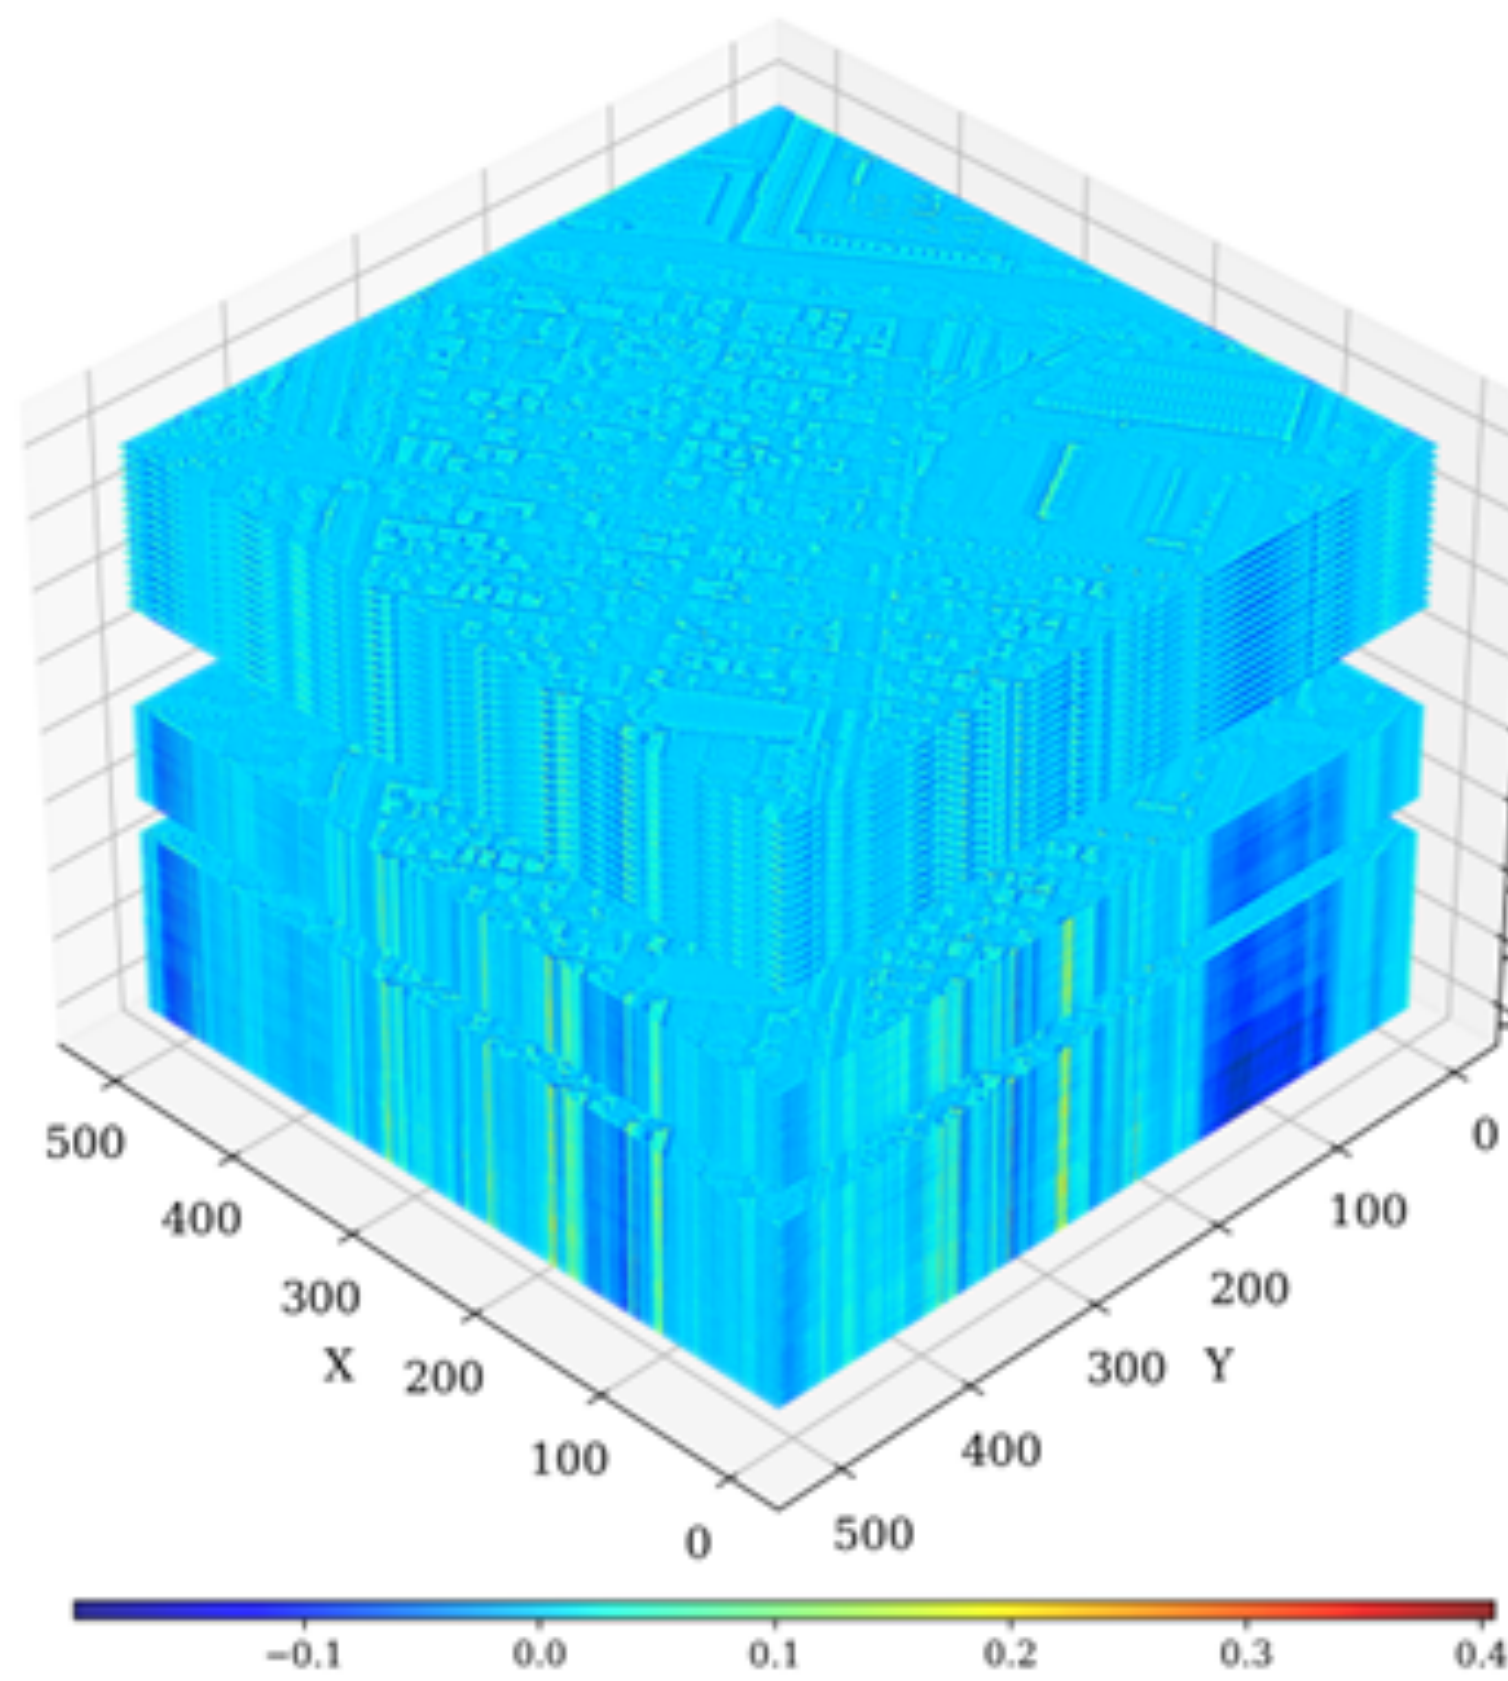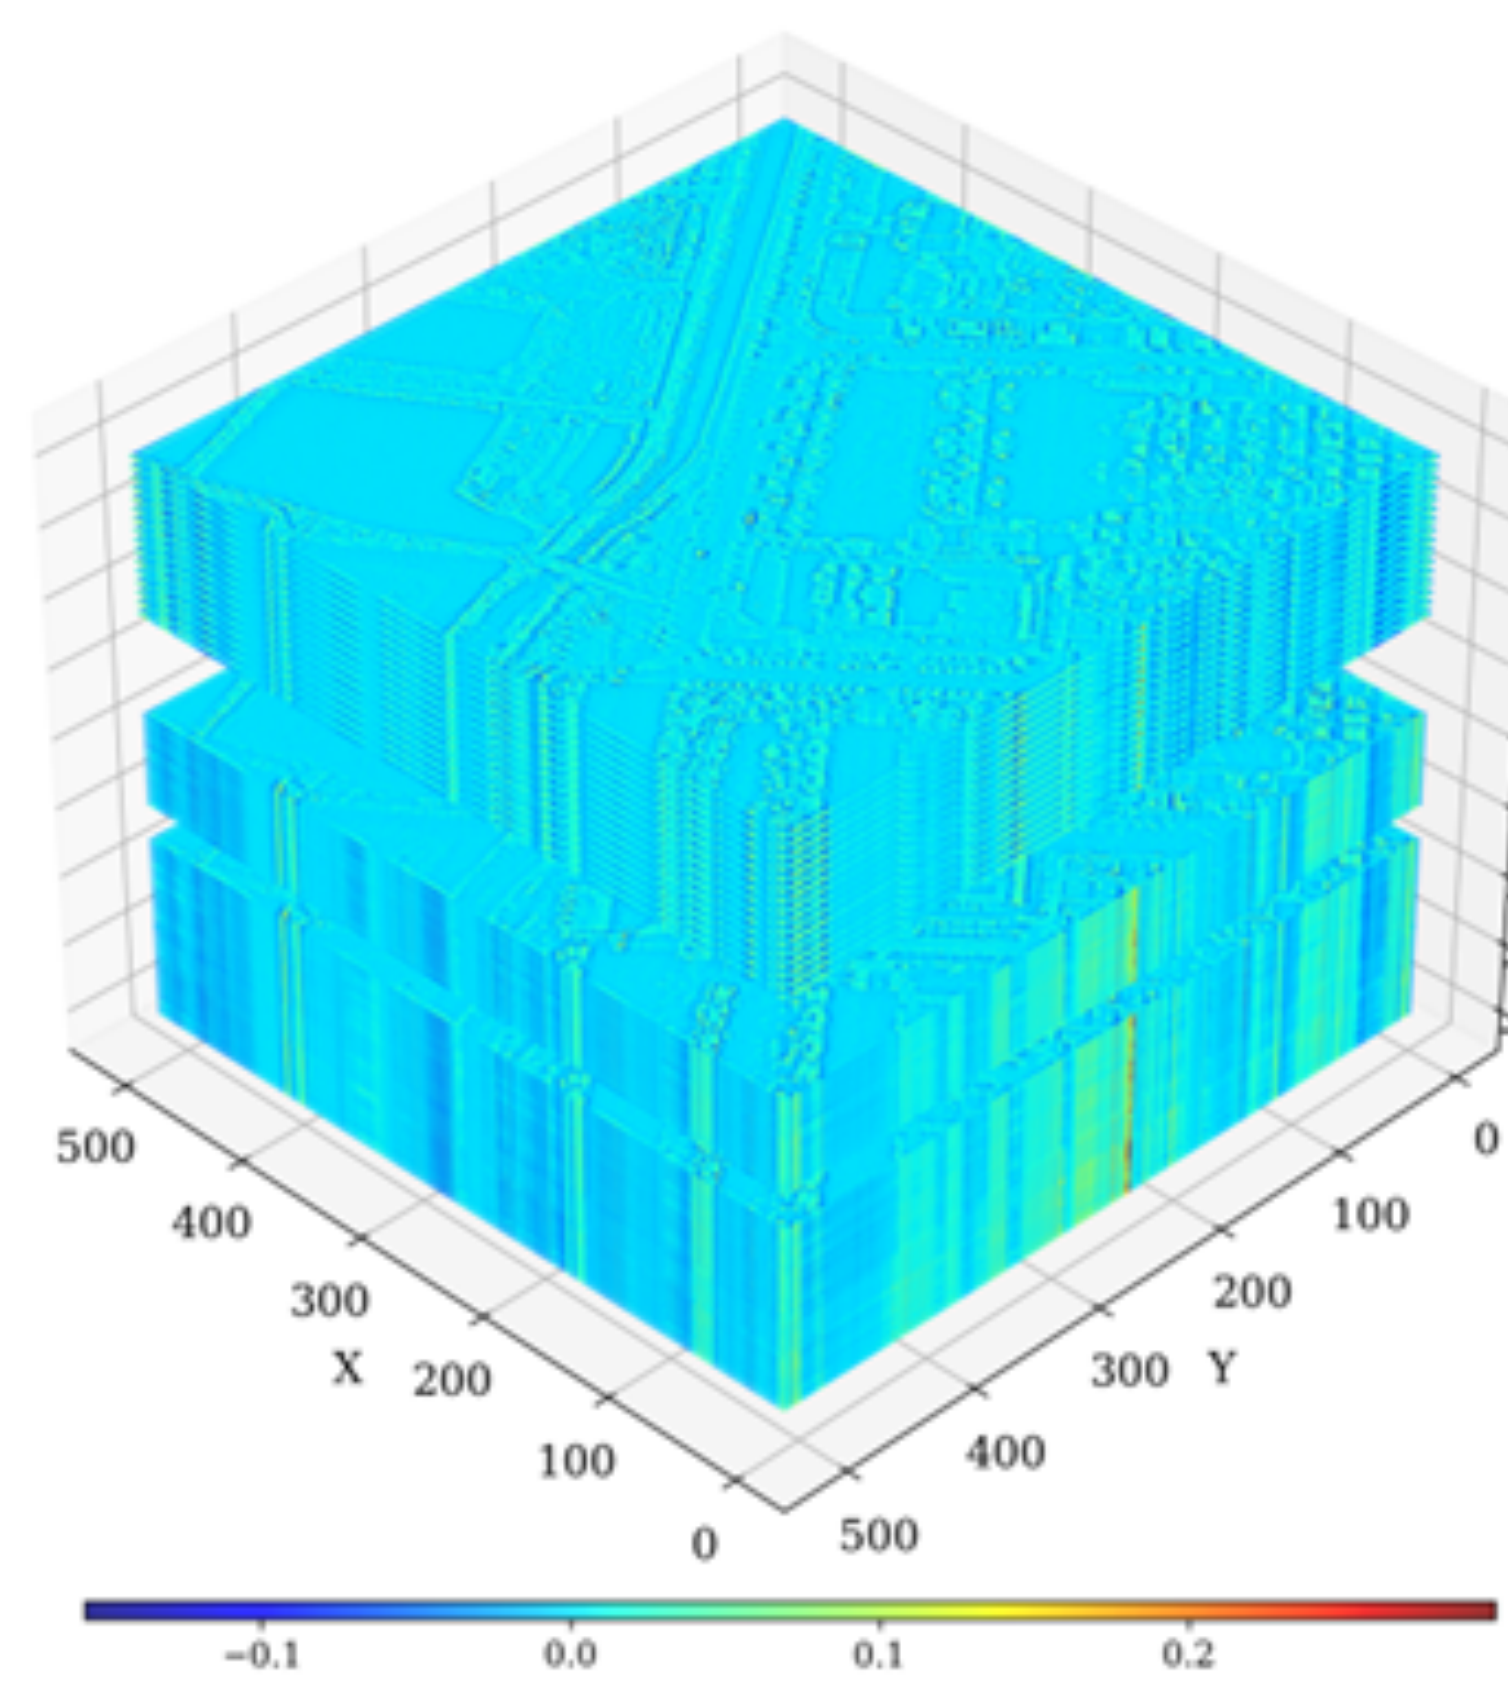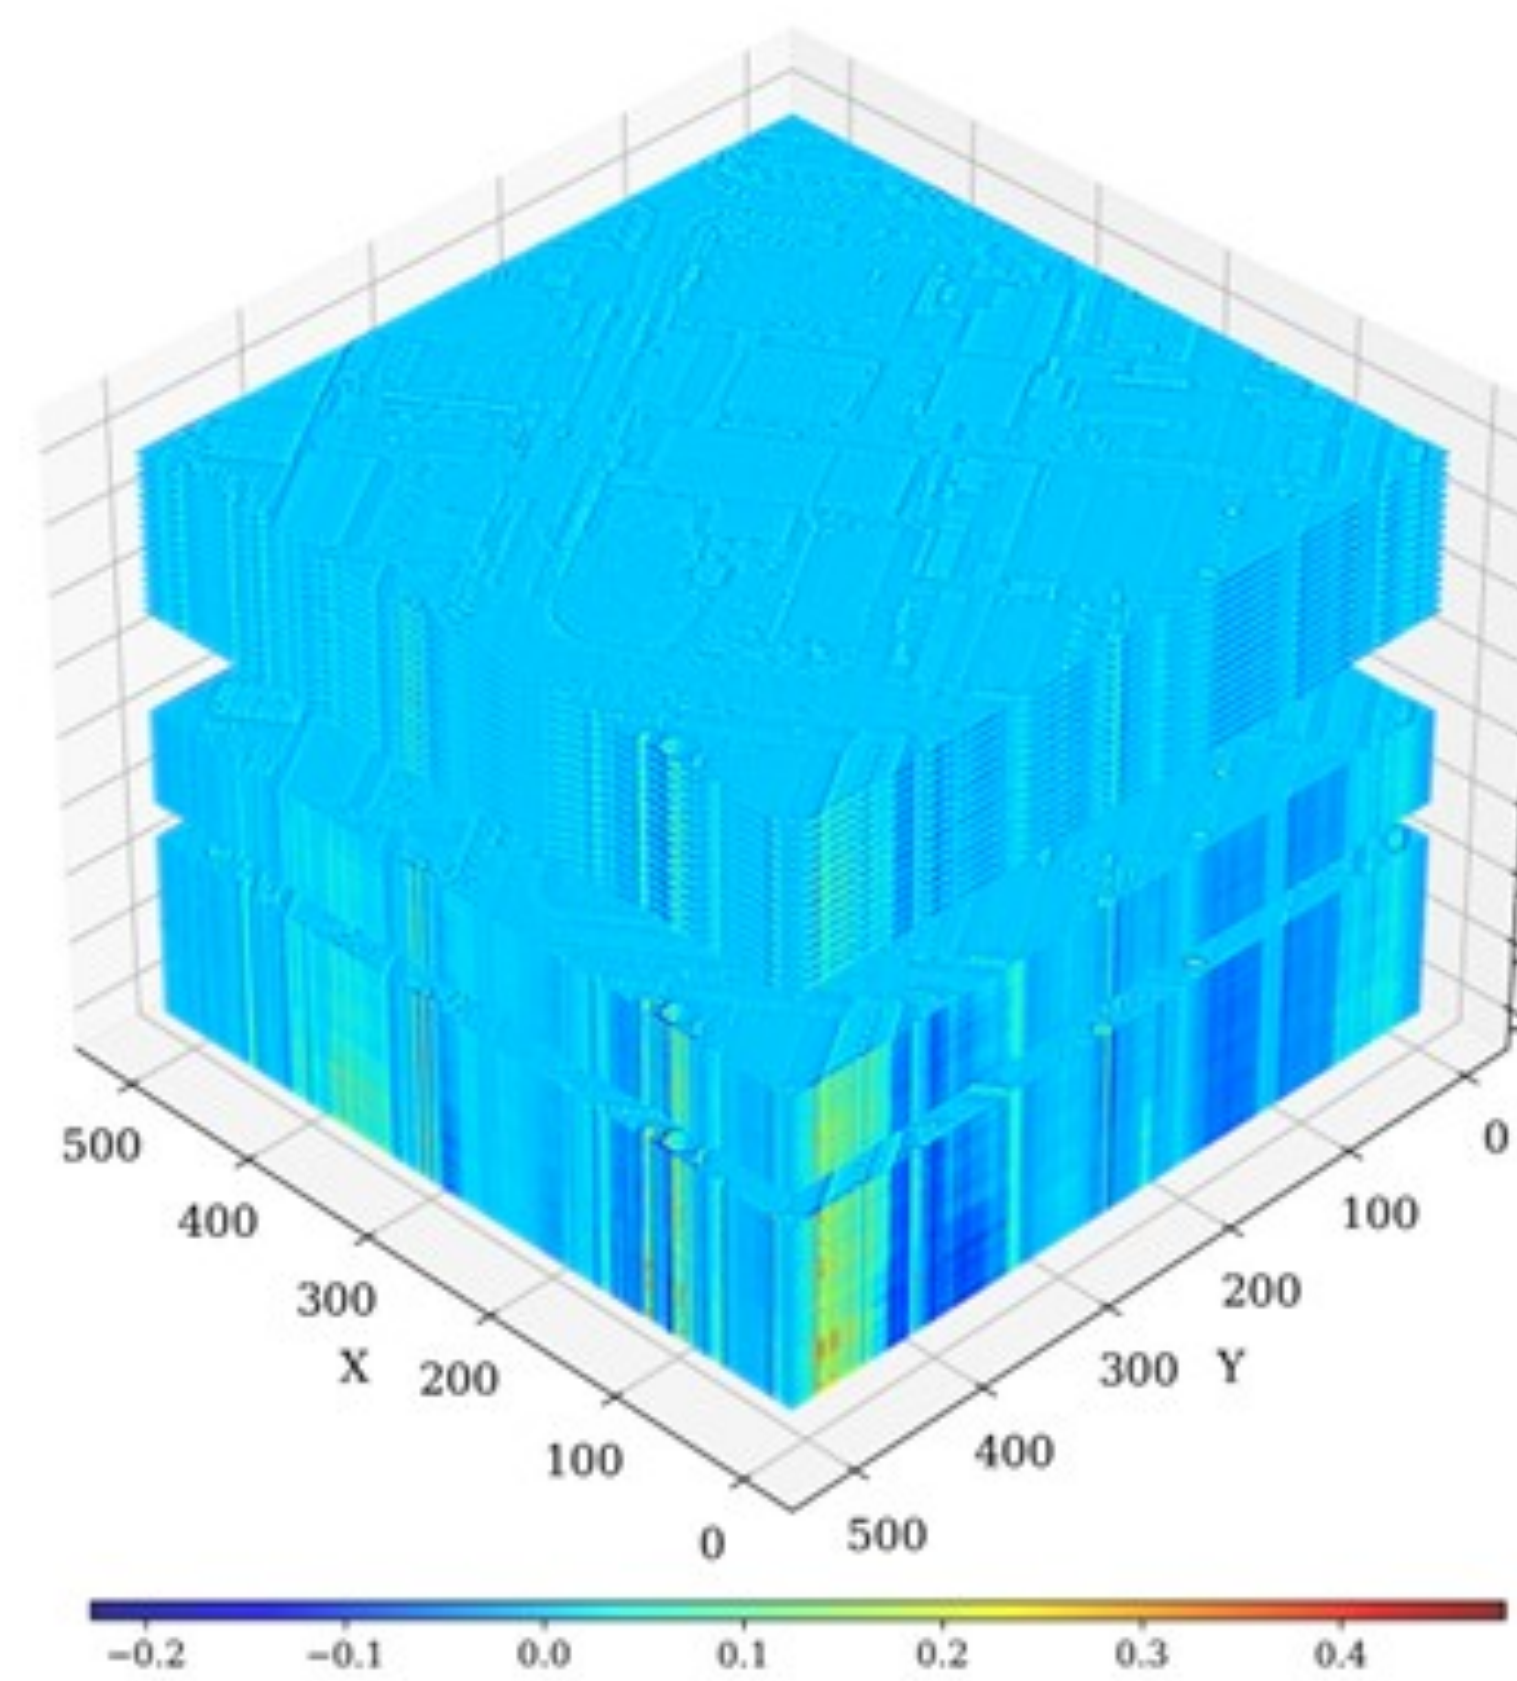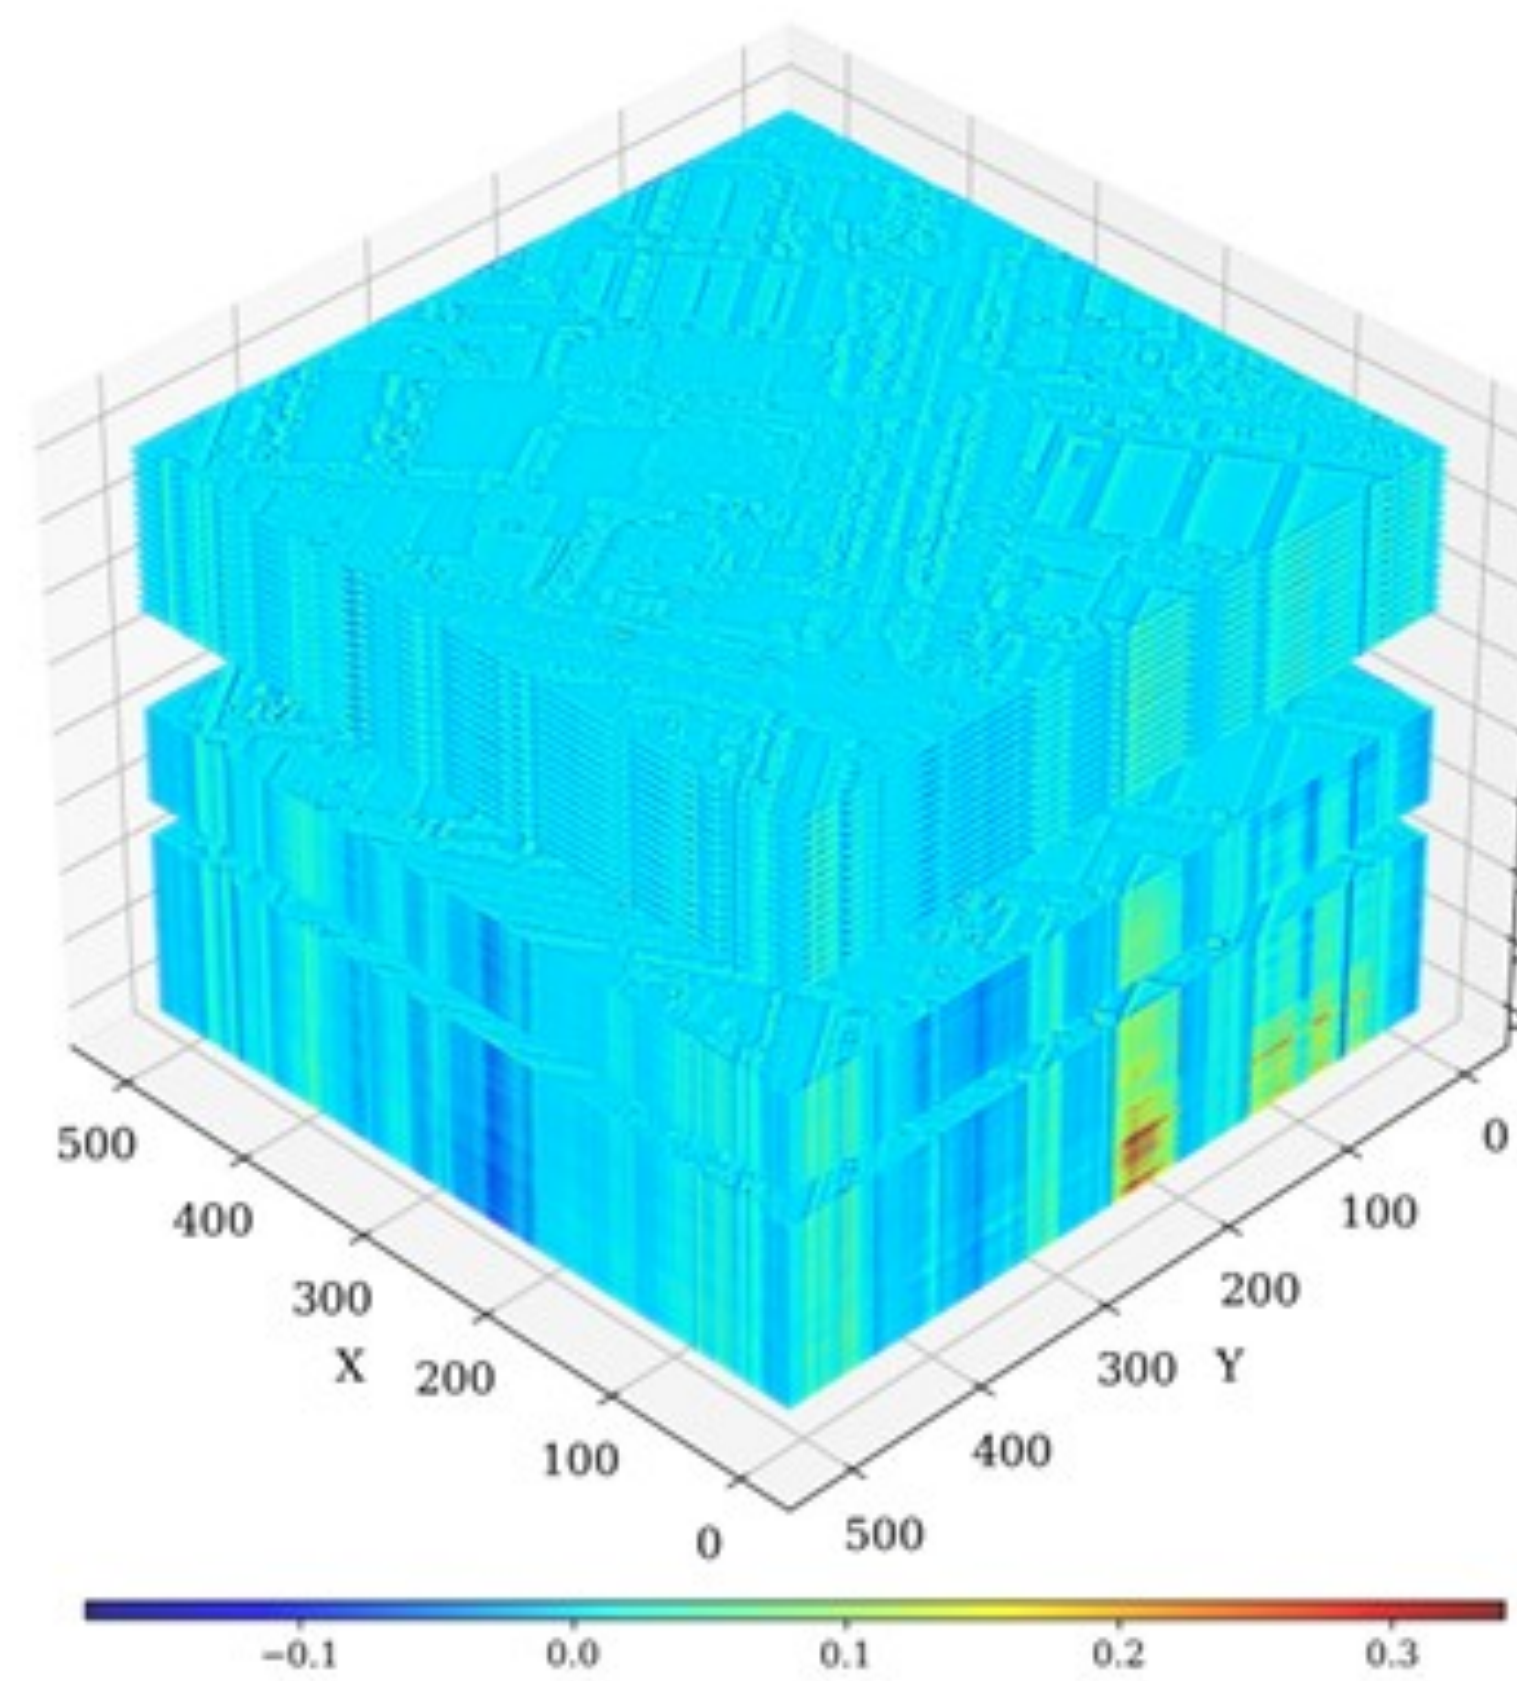

Supplement: supplementary_material [file vis_radiance_gf2.pdf › 6758_Physics-informed Neural Operator for Pansharpening_supplementary_material/vis_radiance_gf2.pdf]

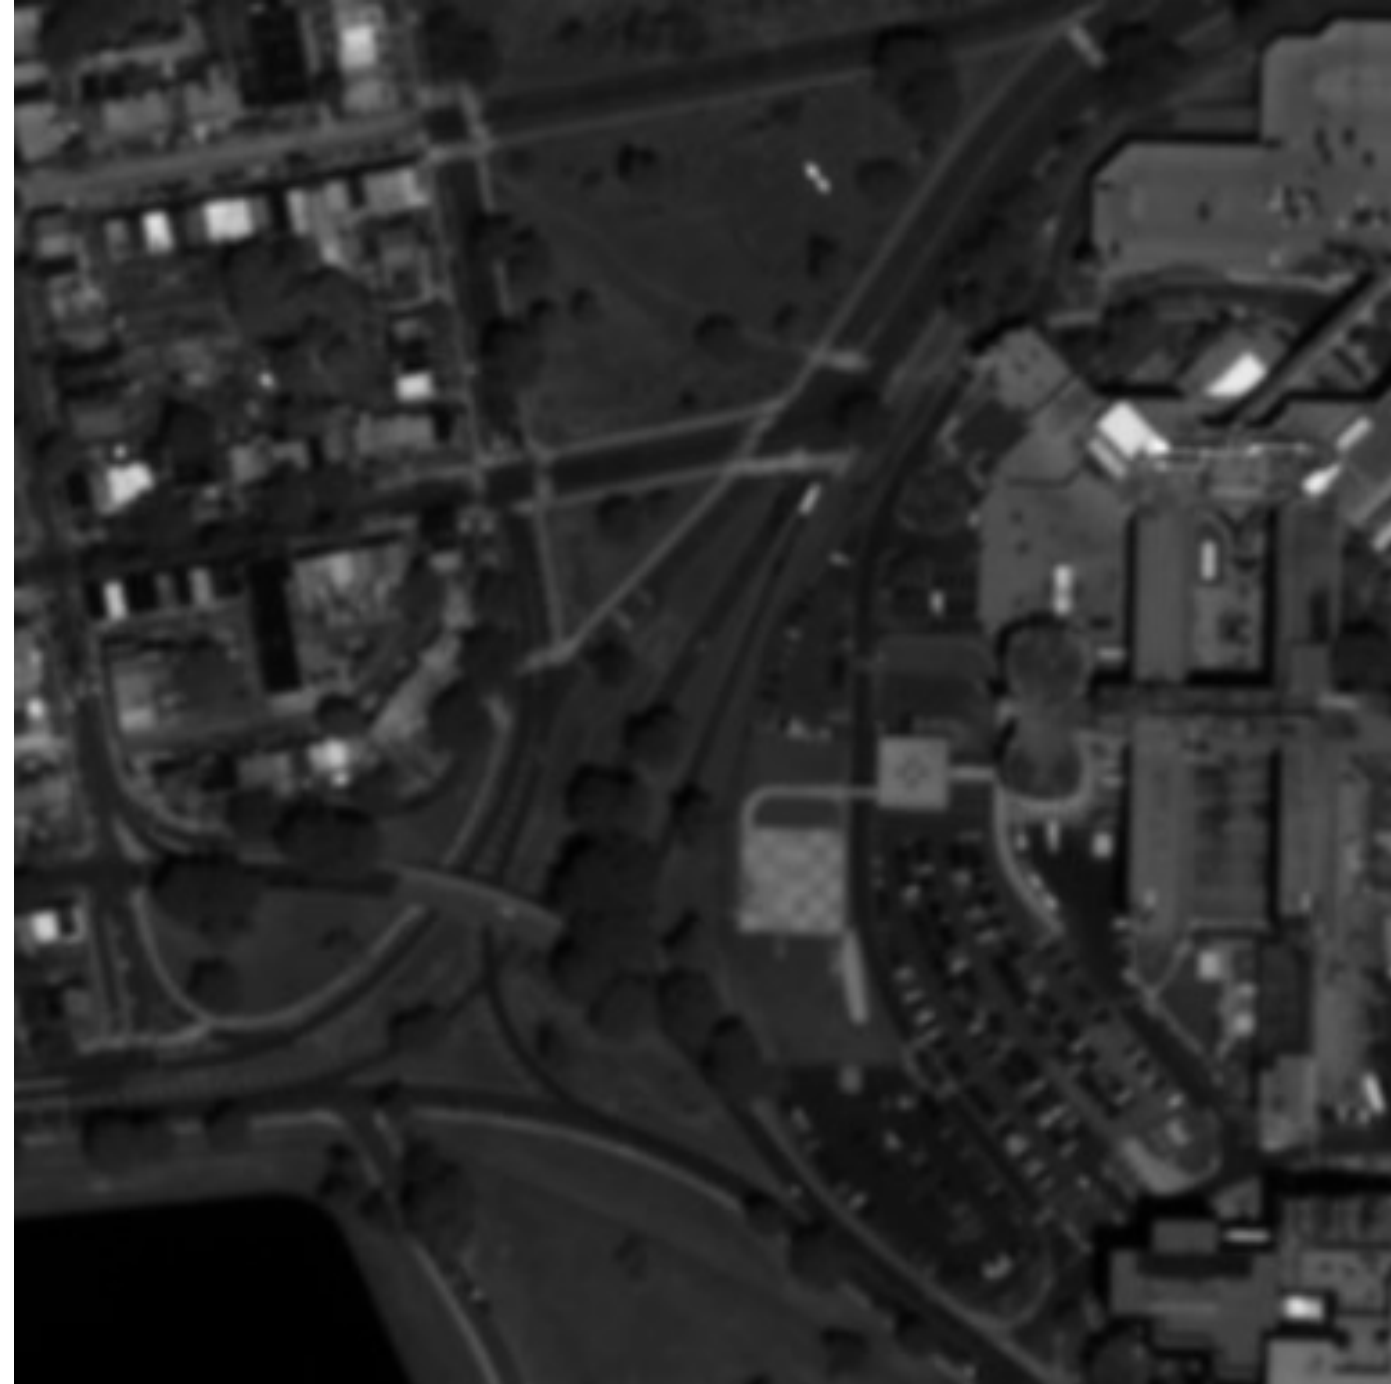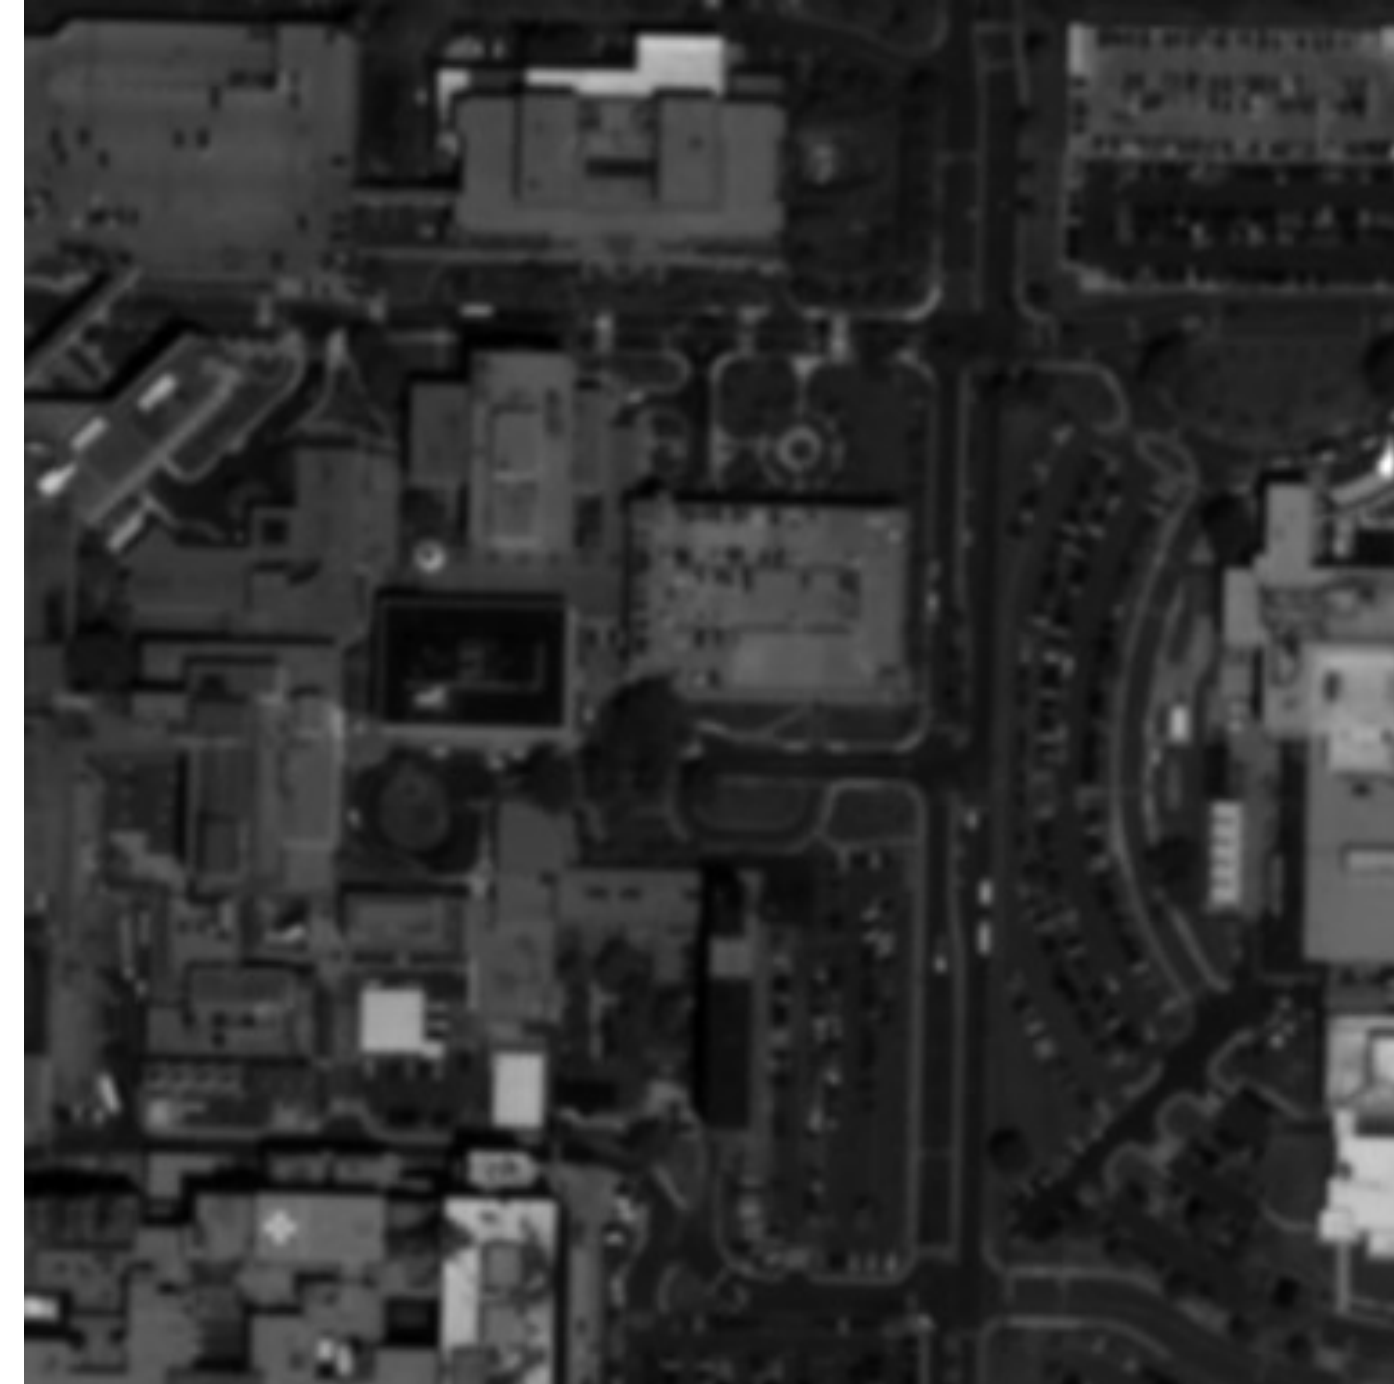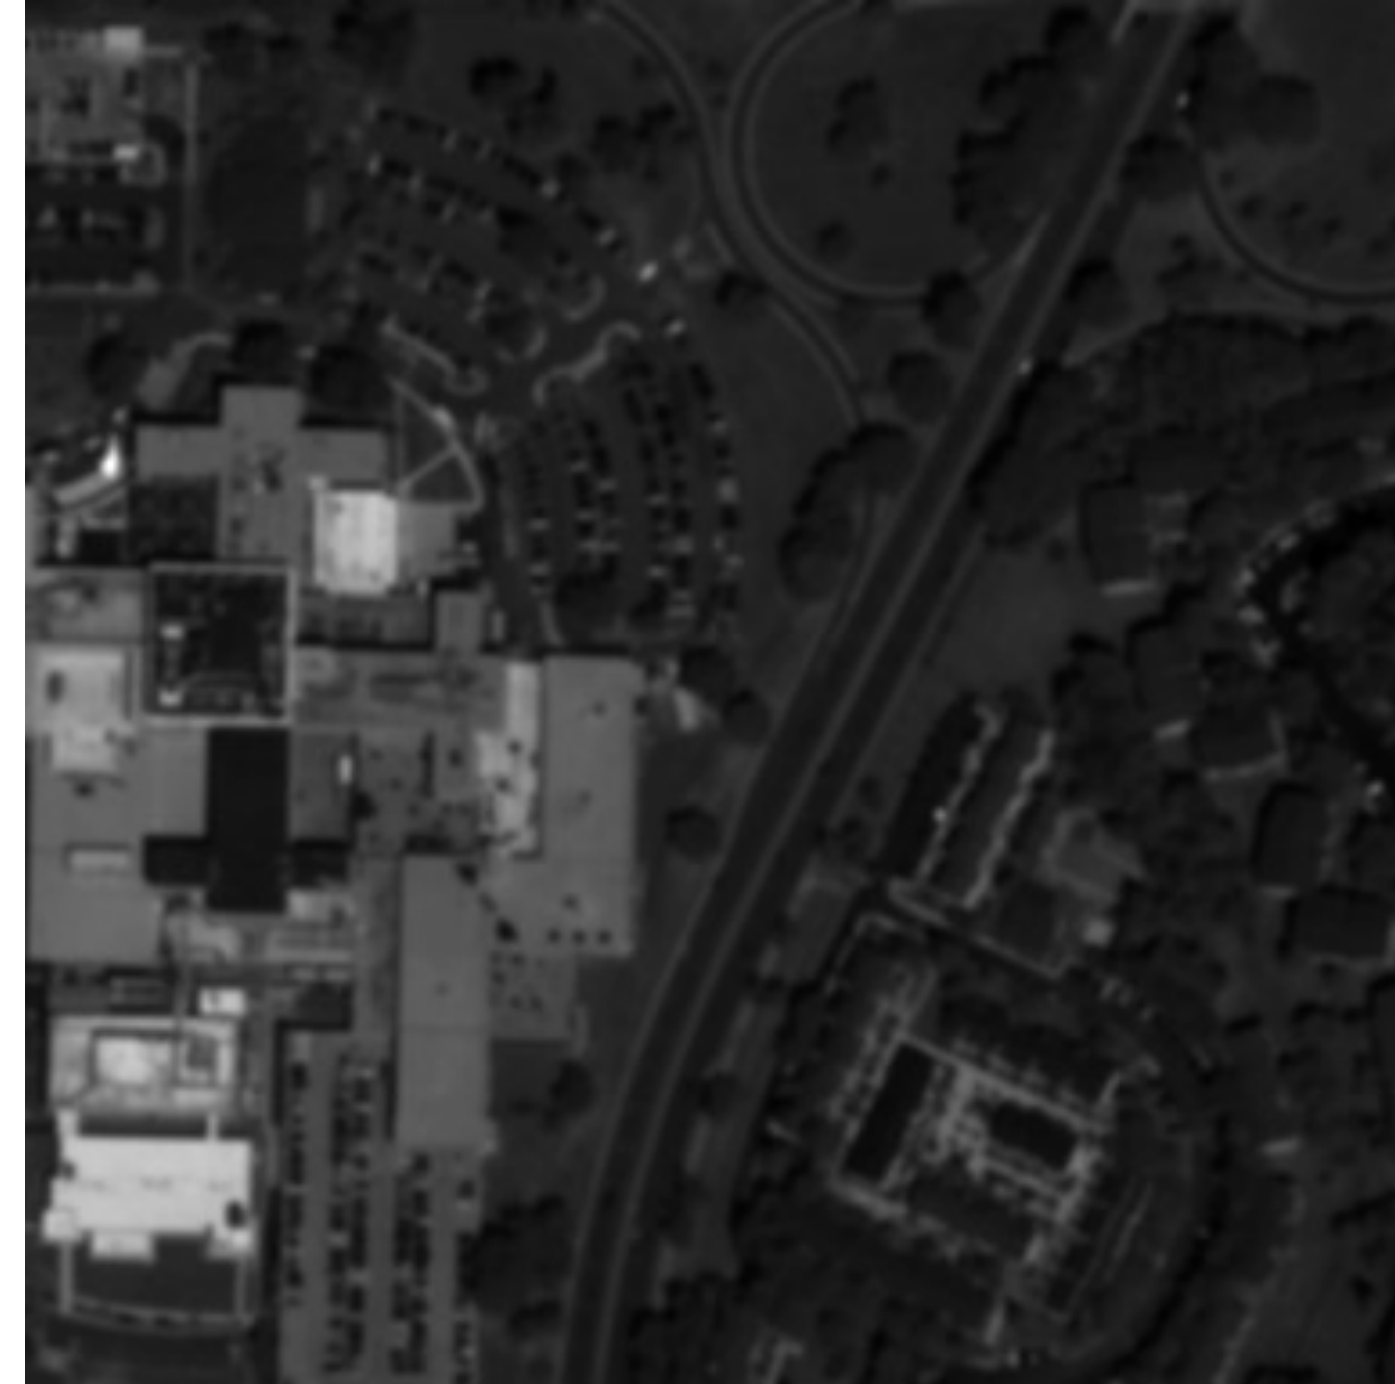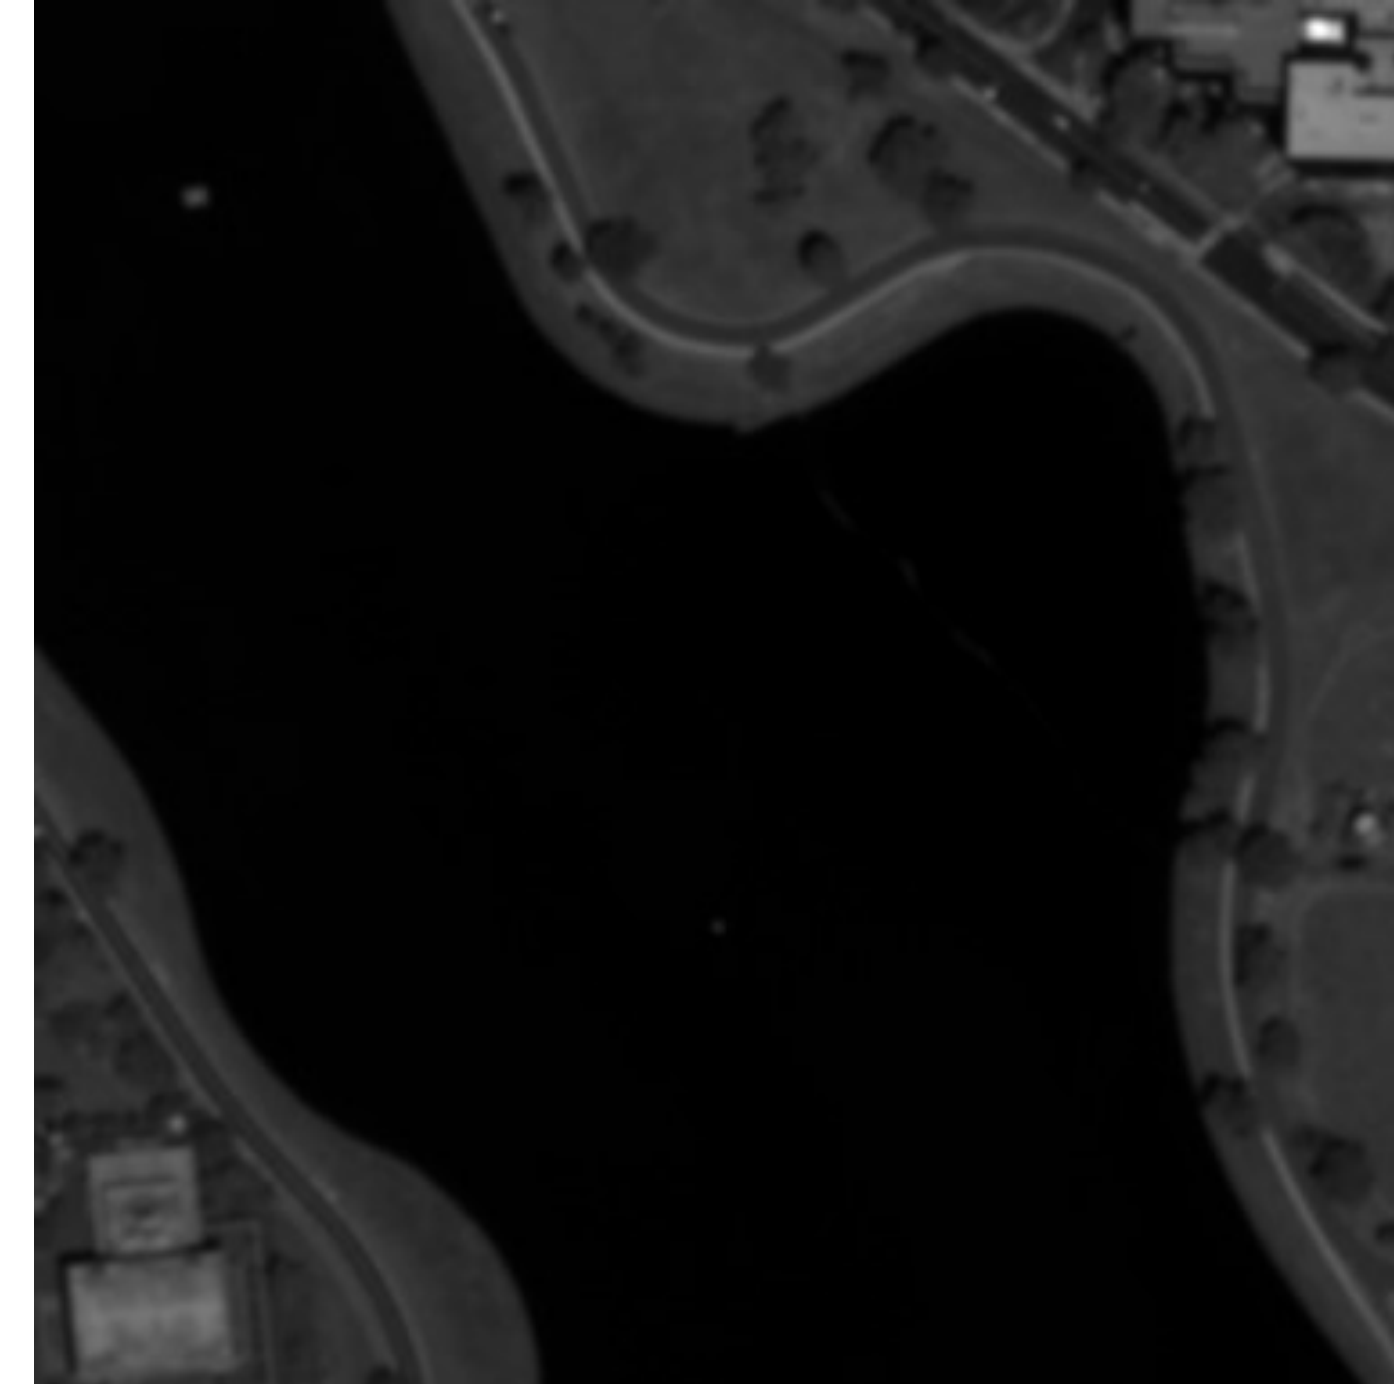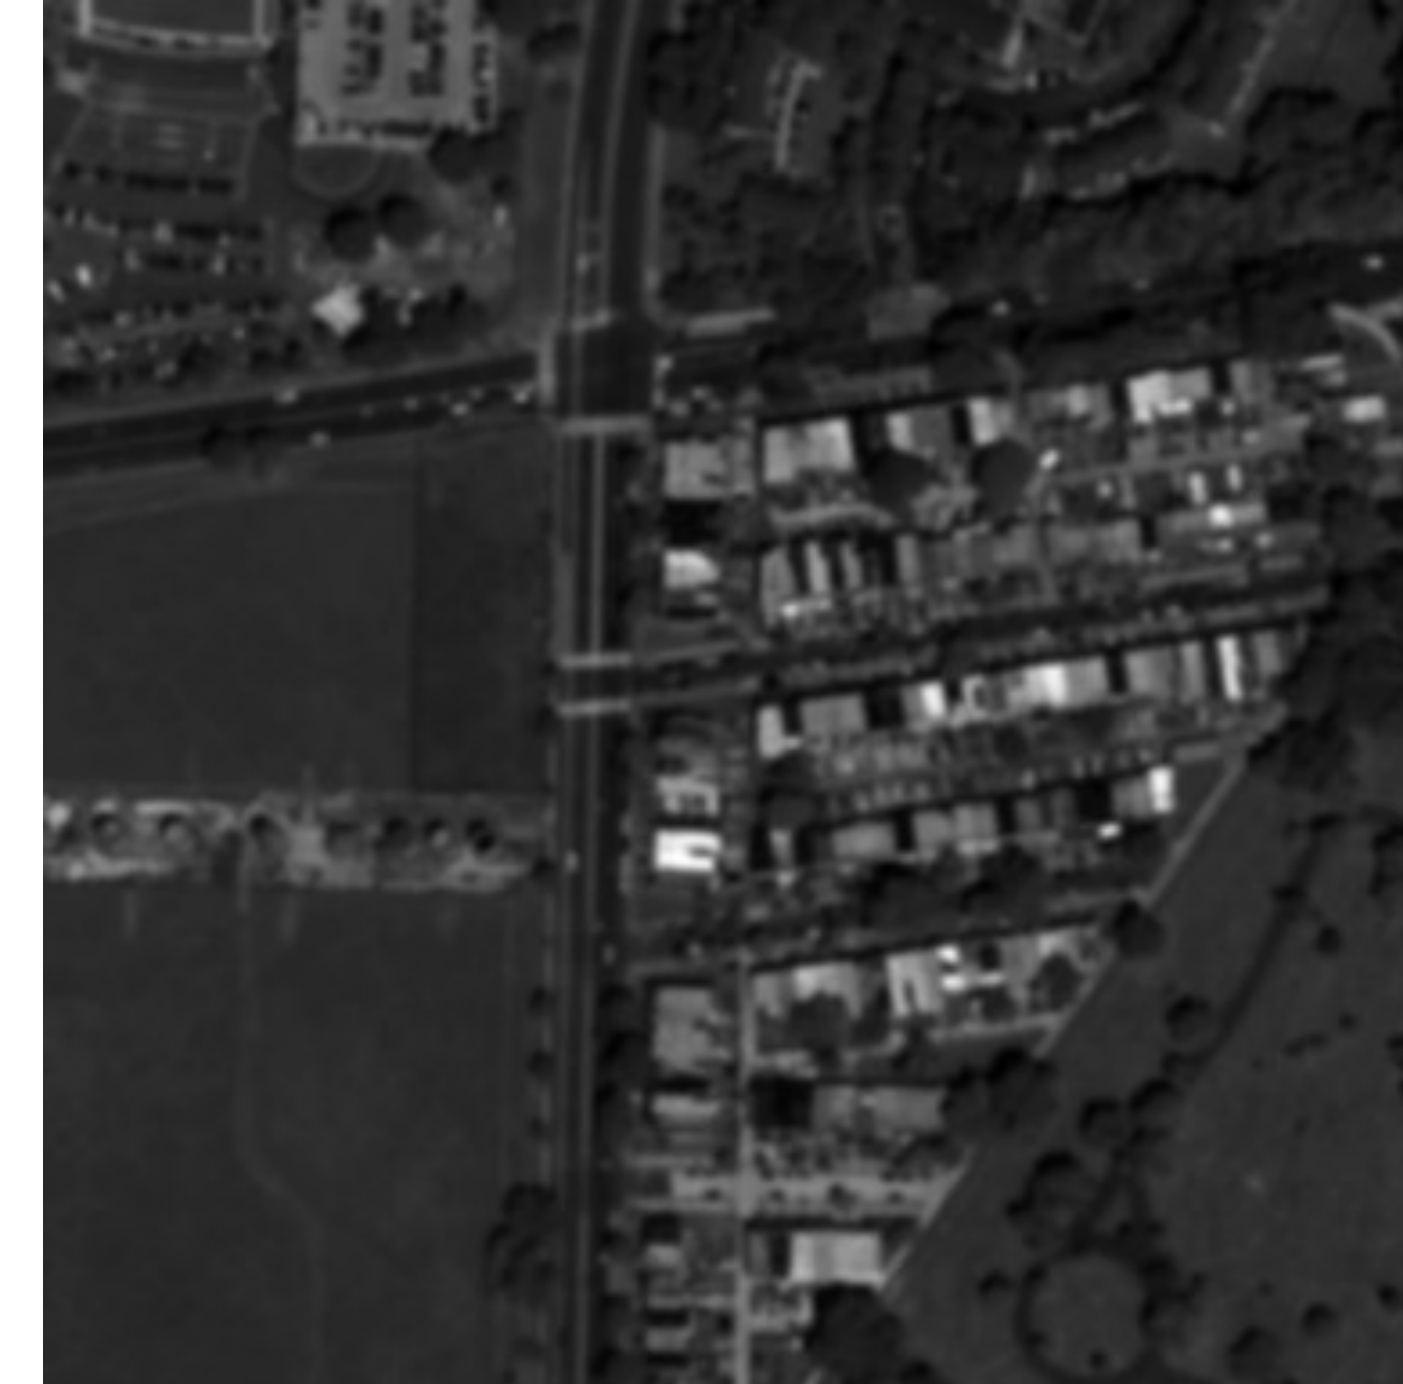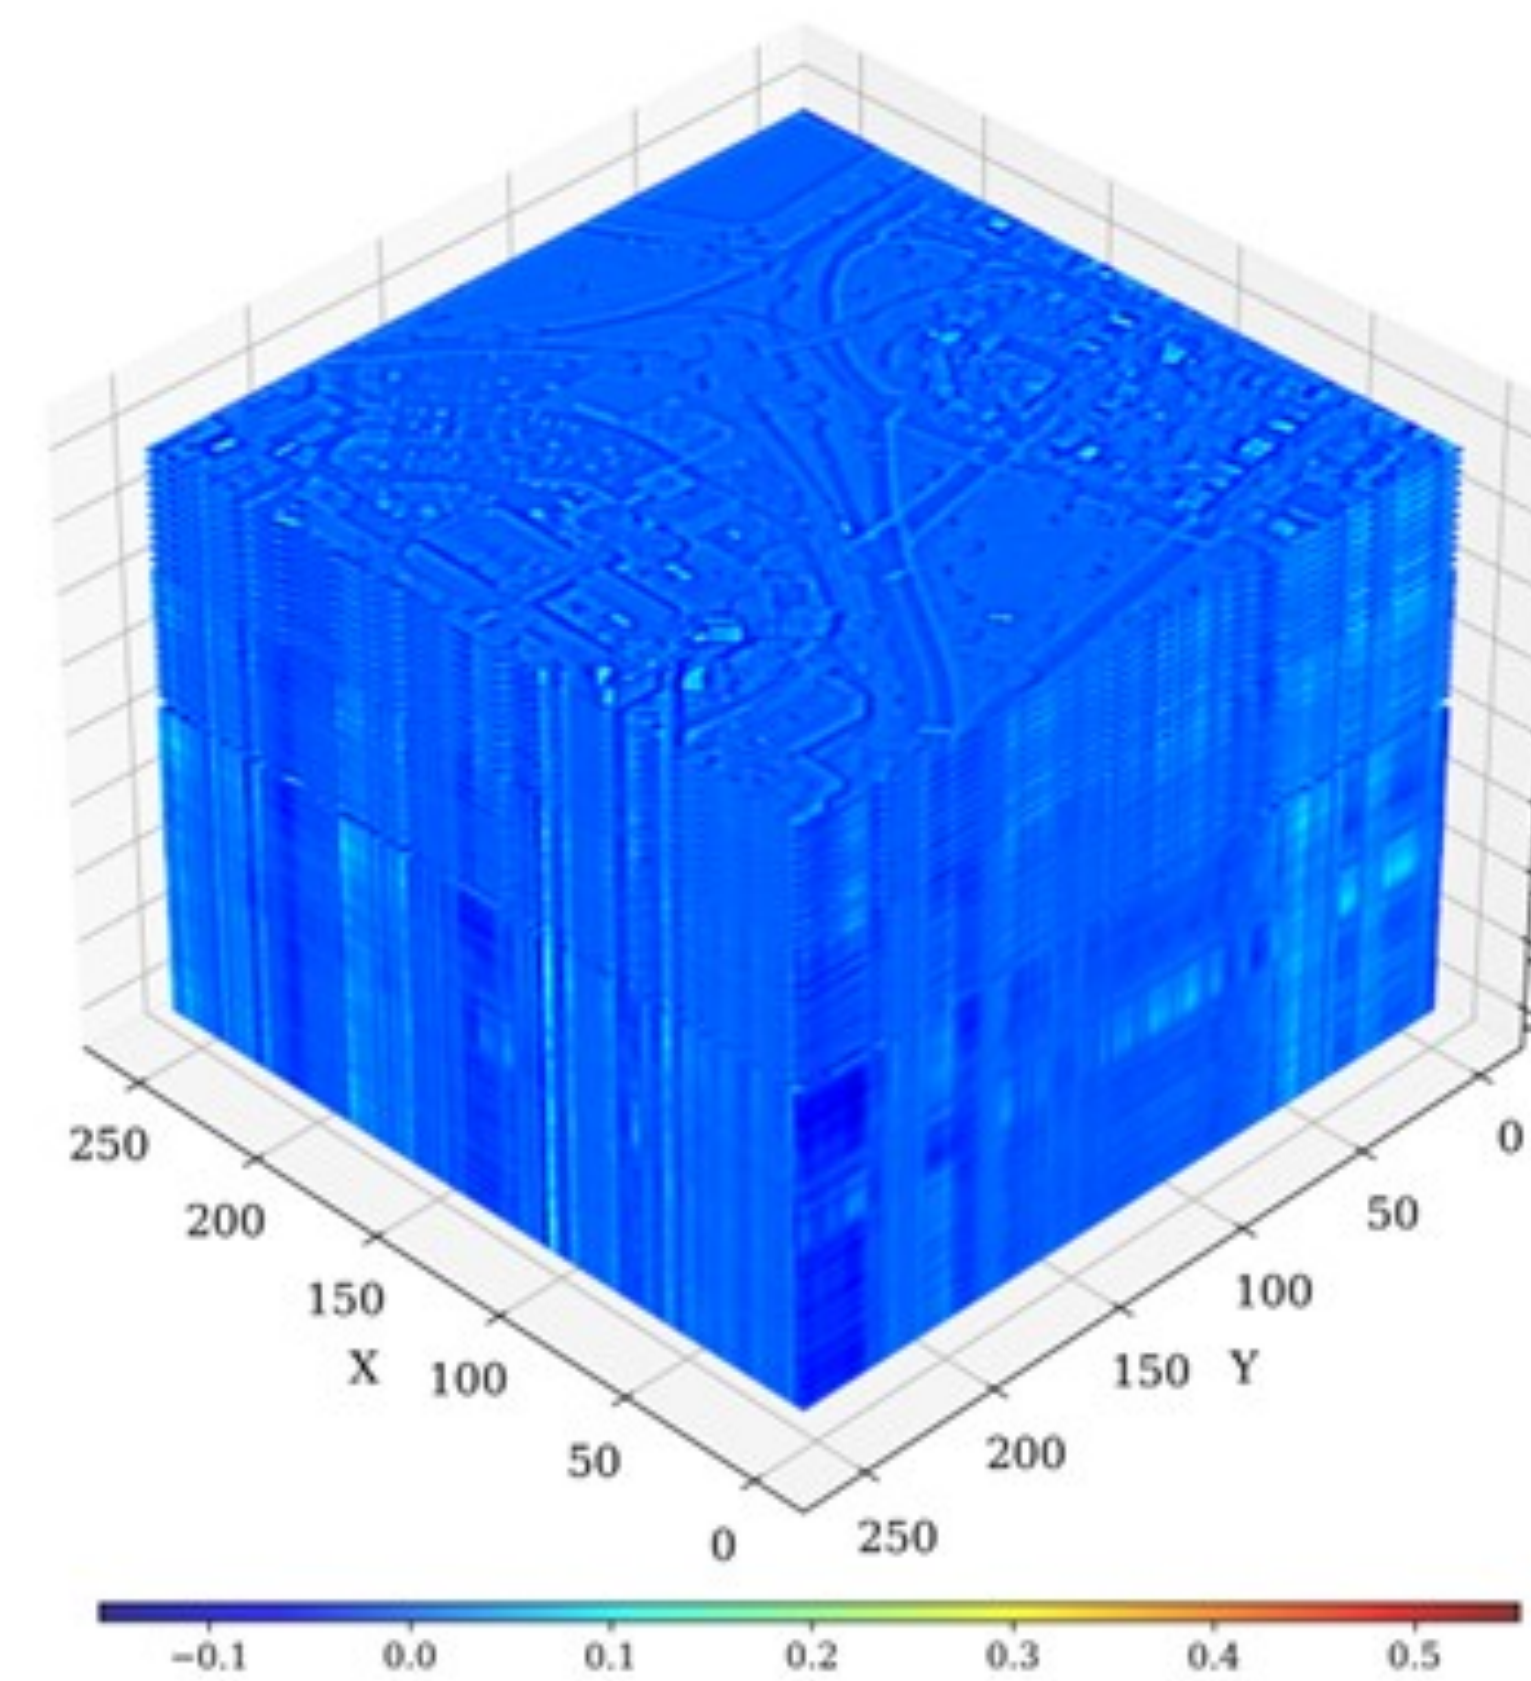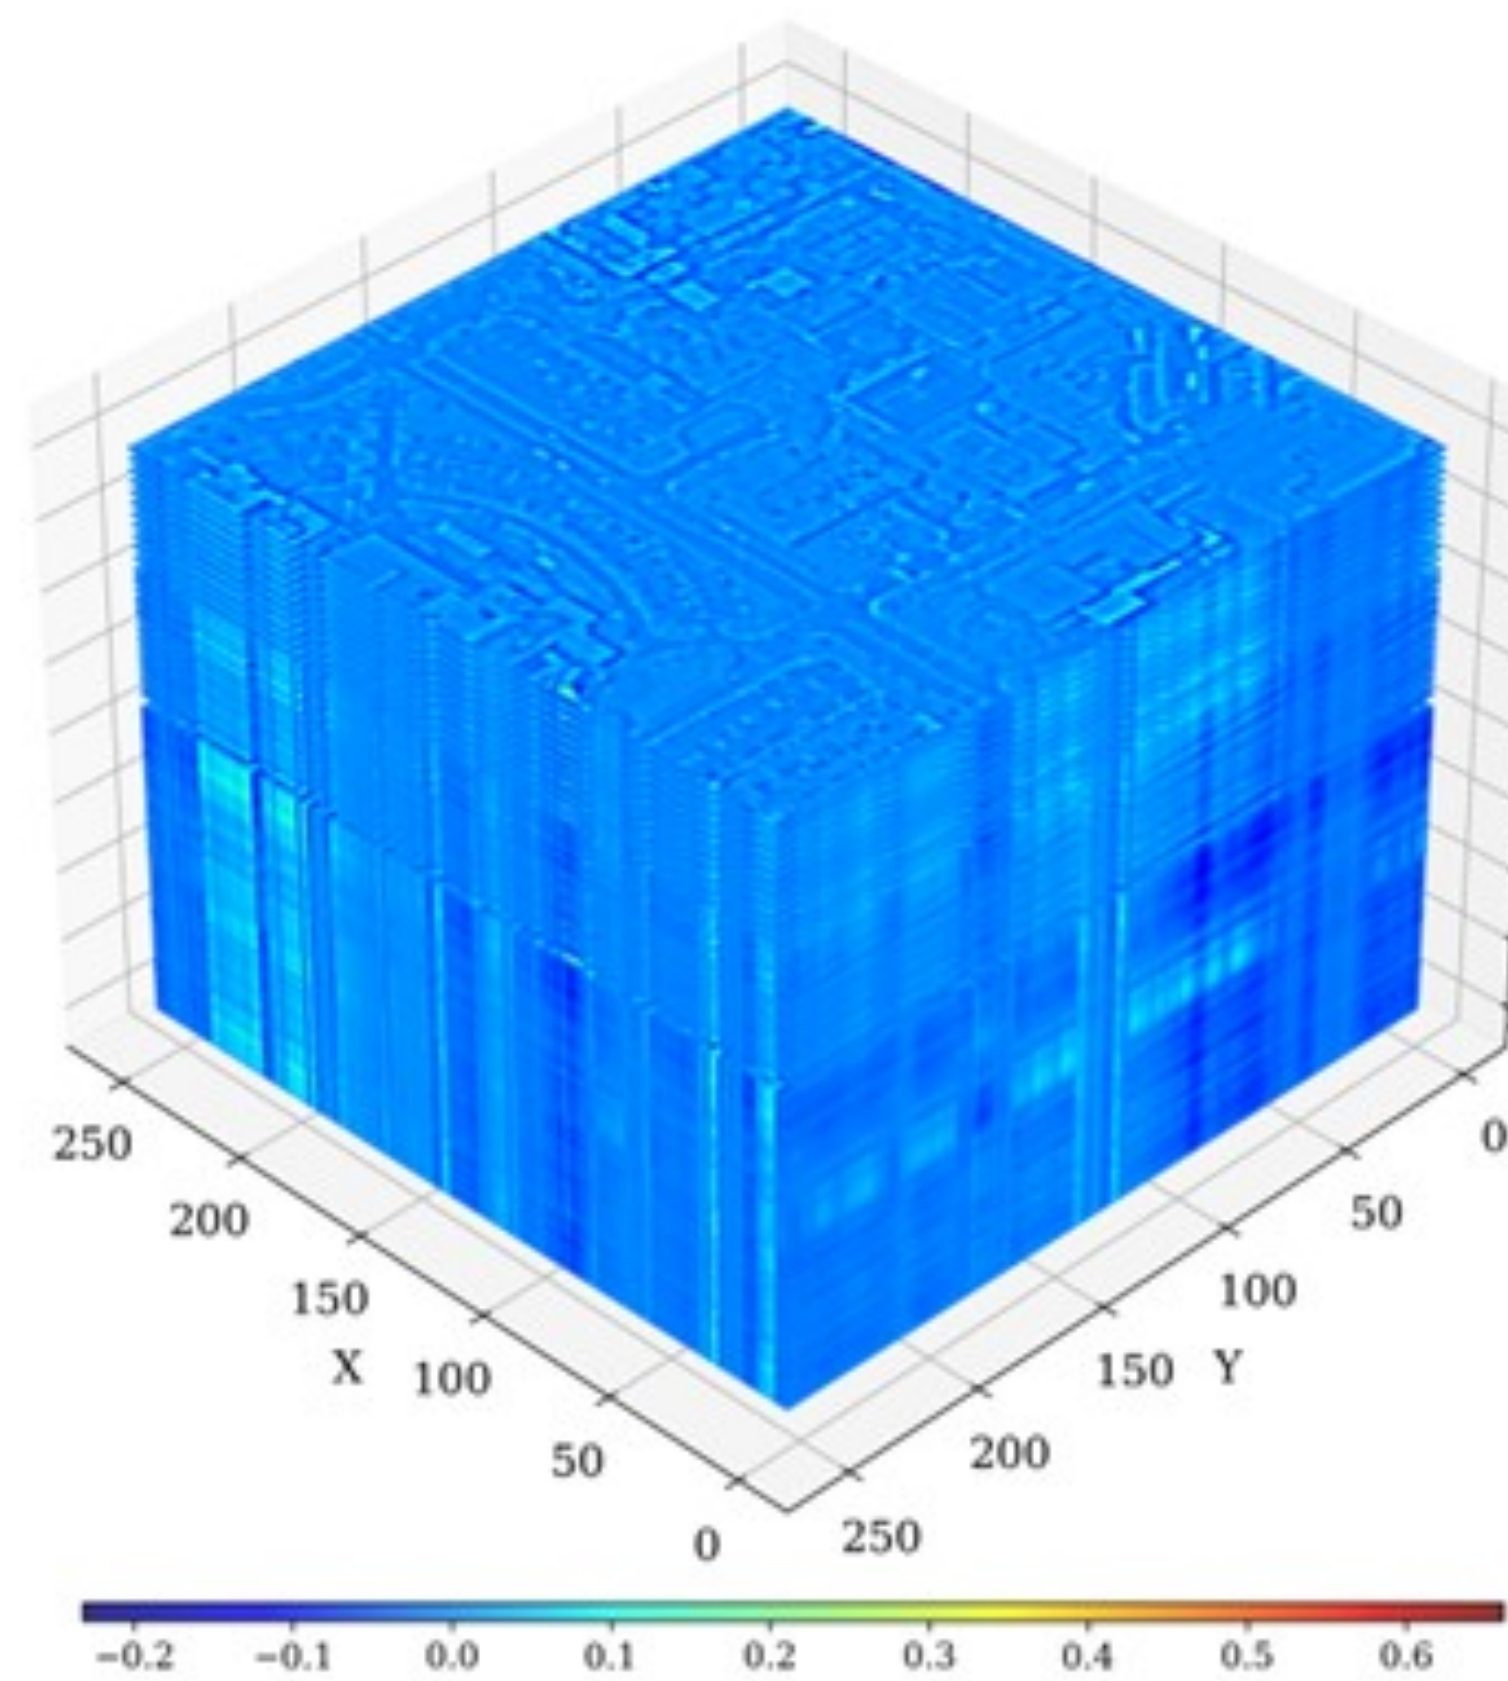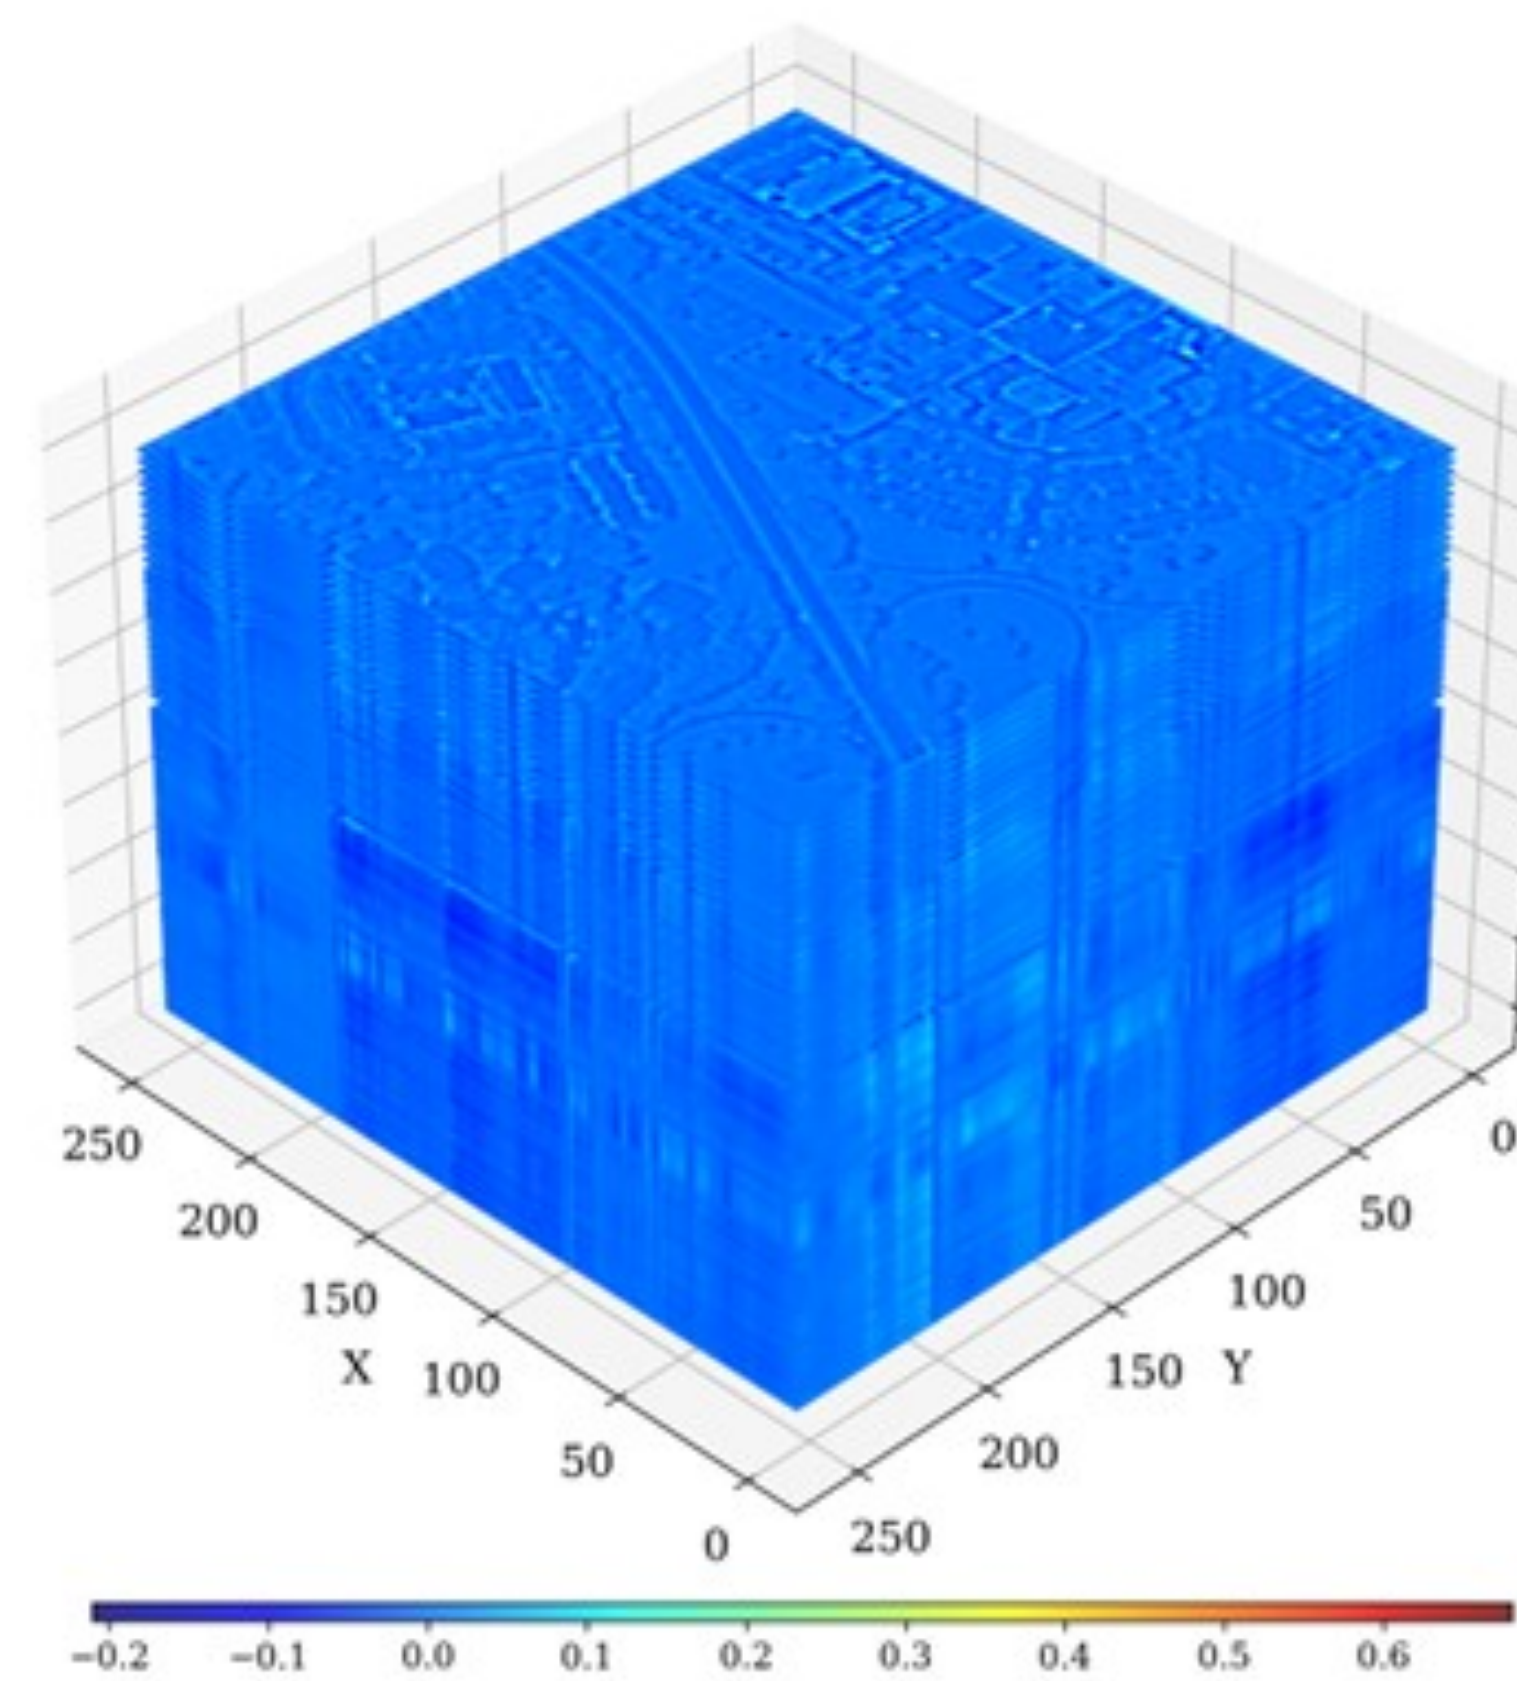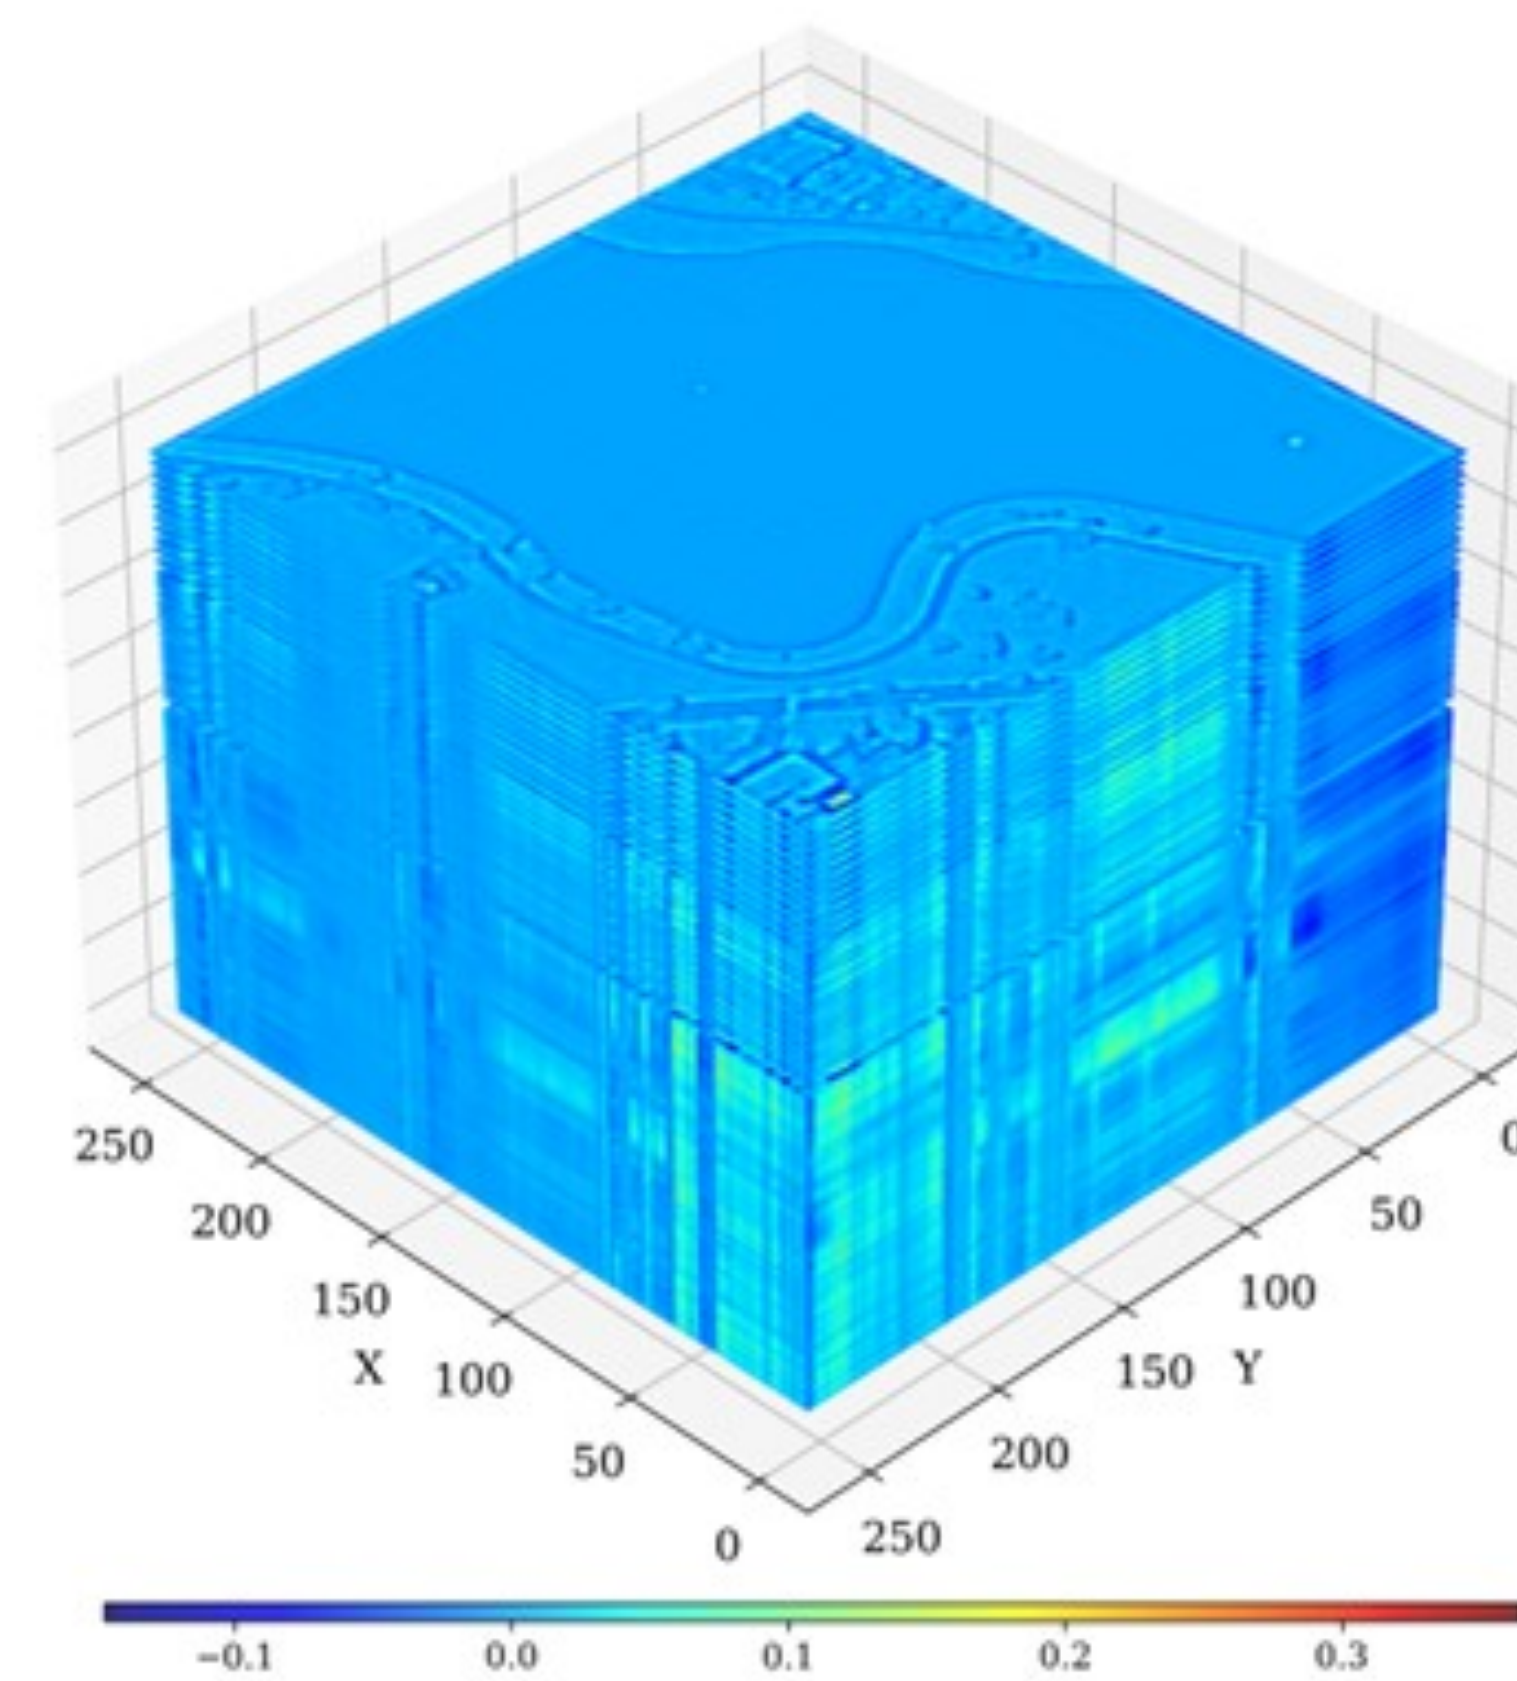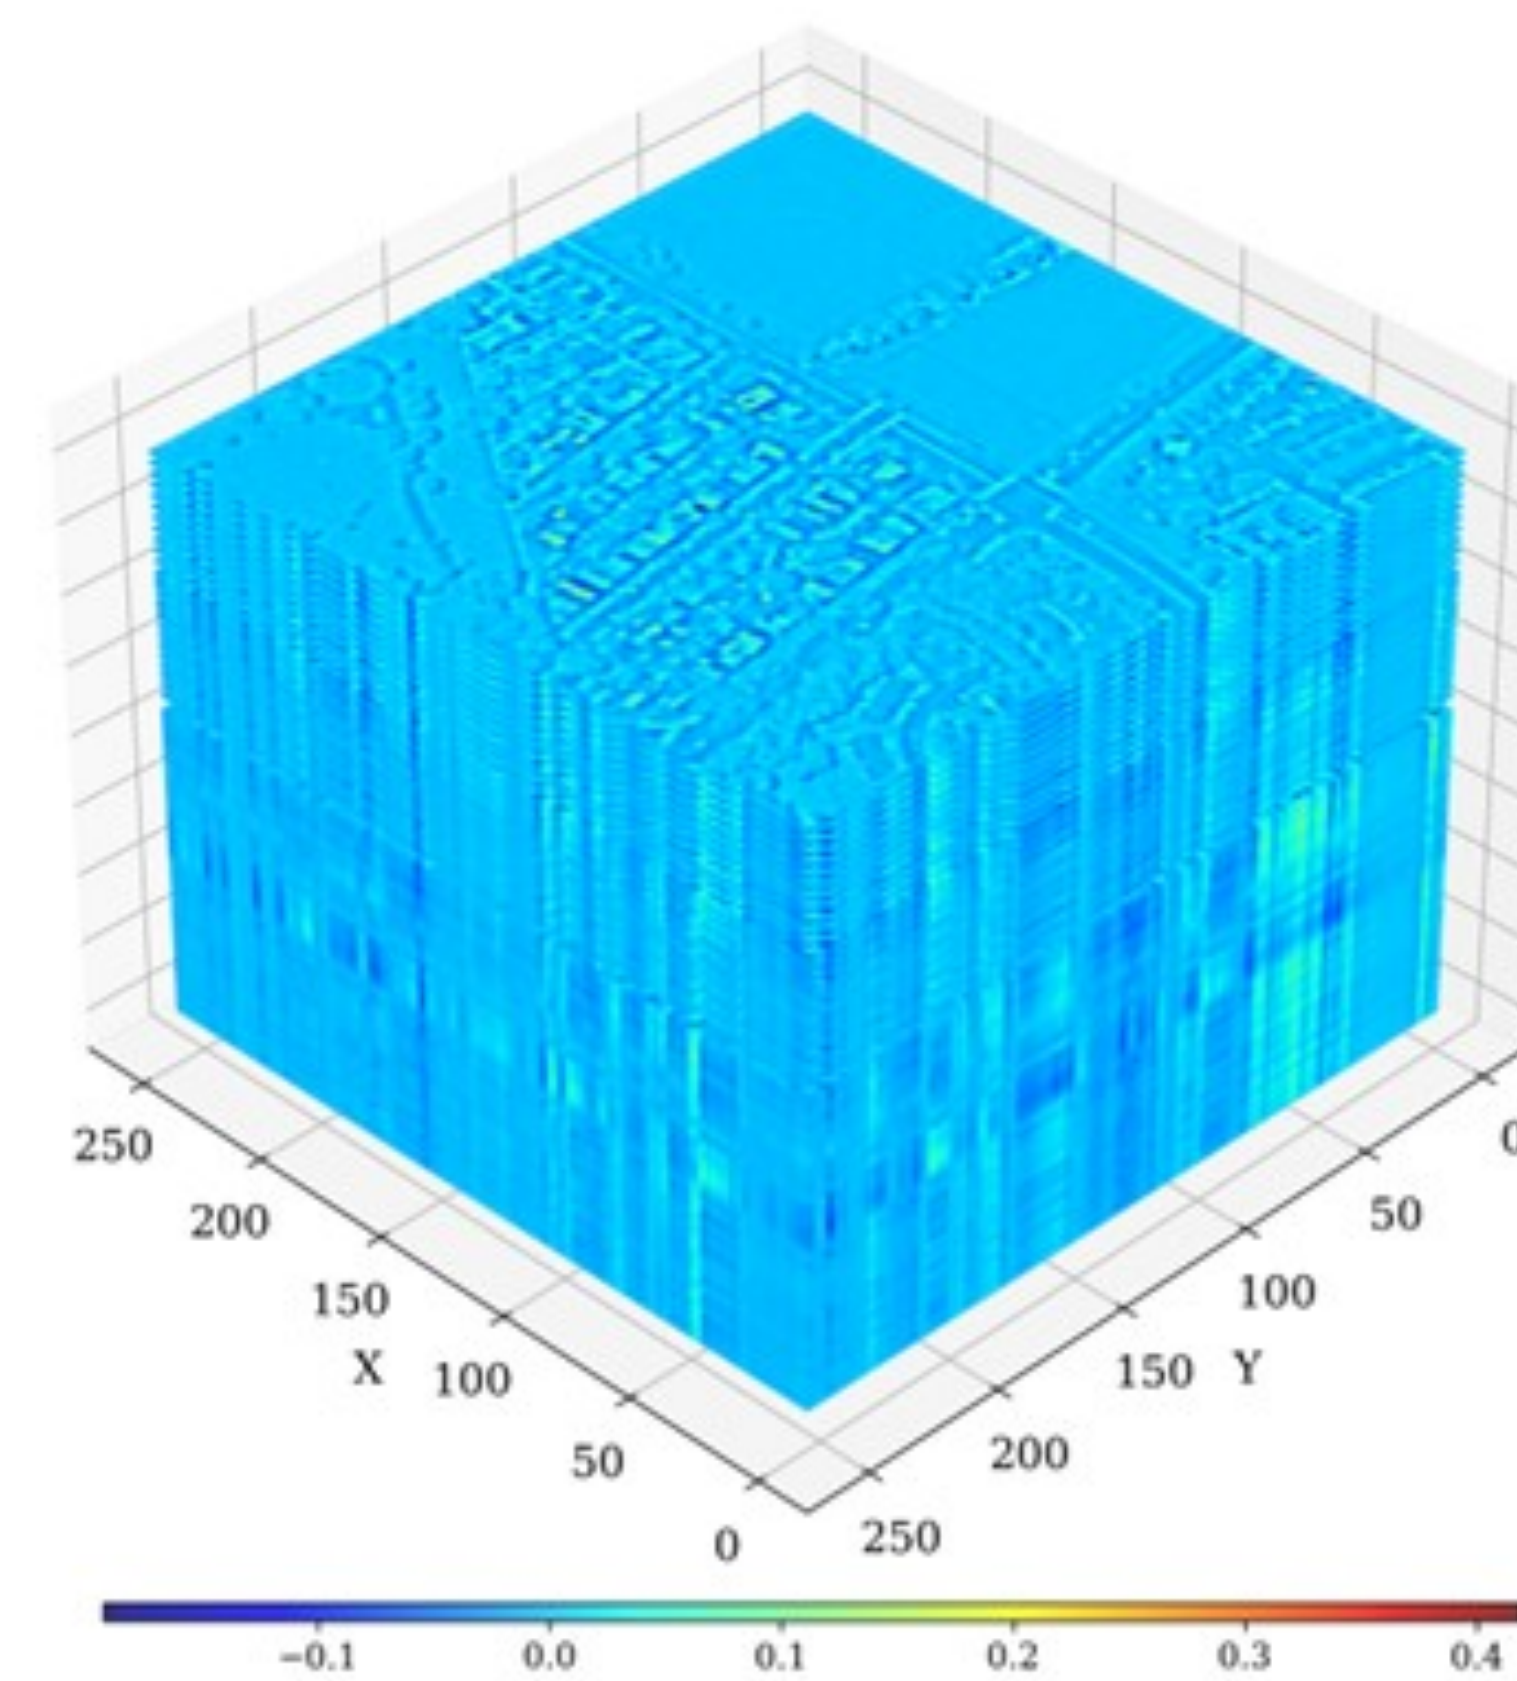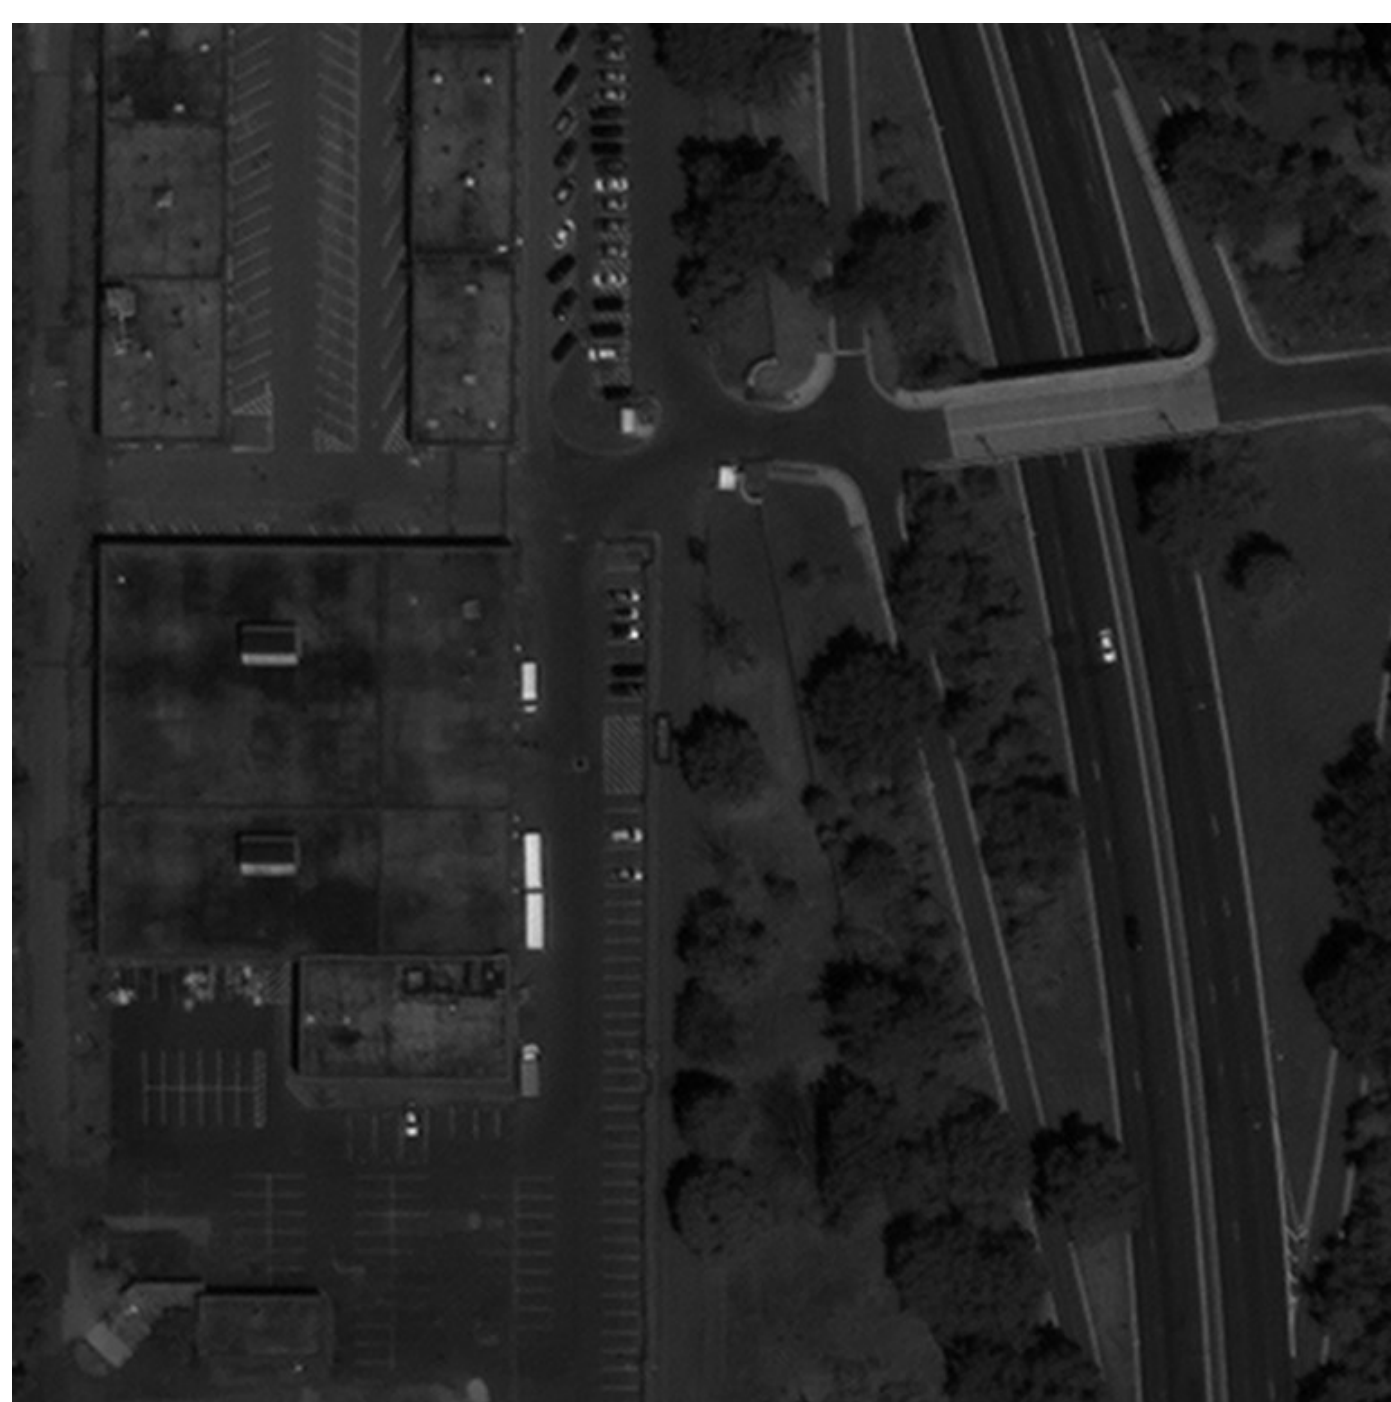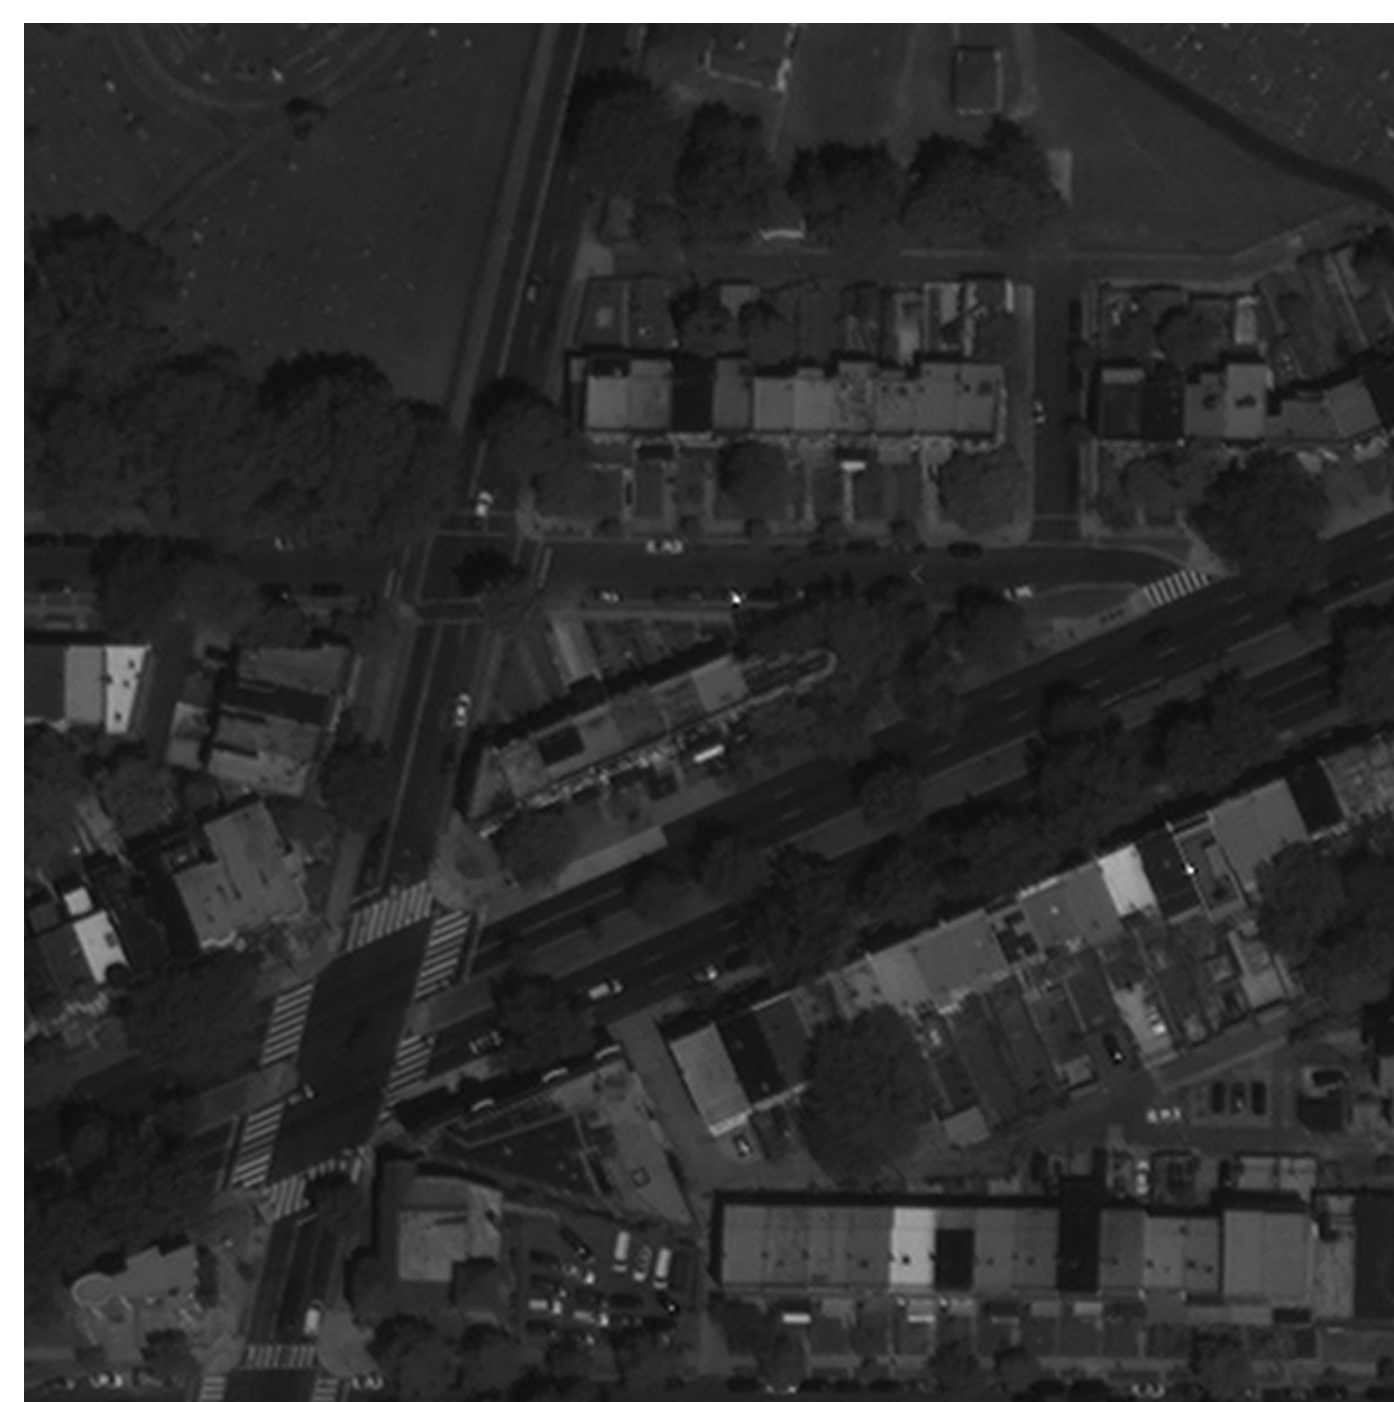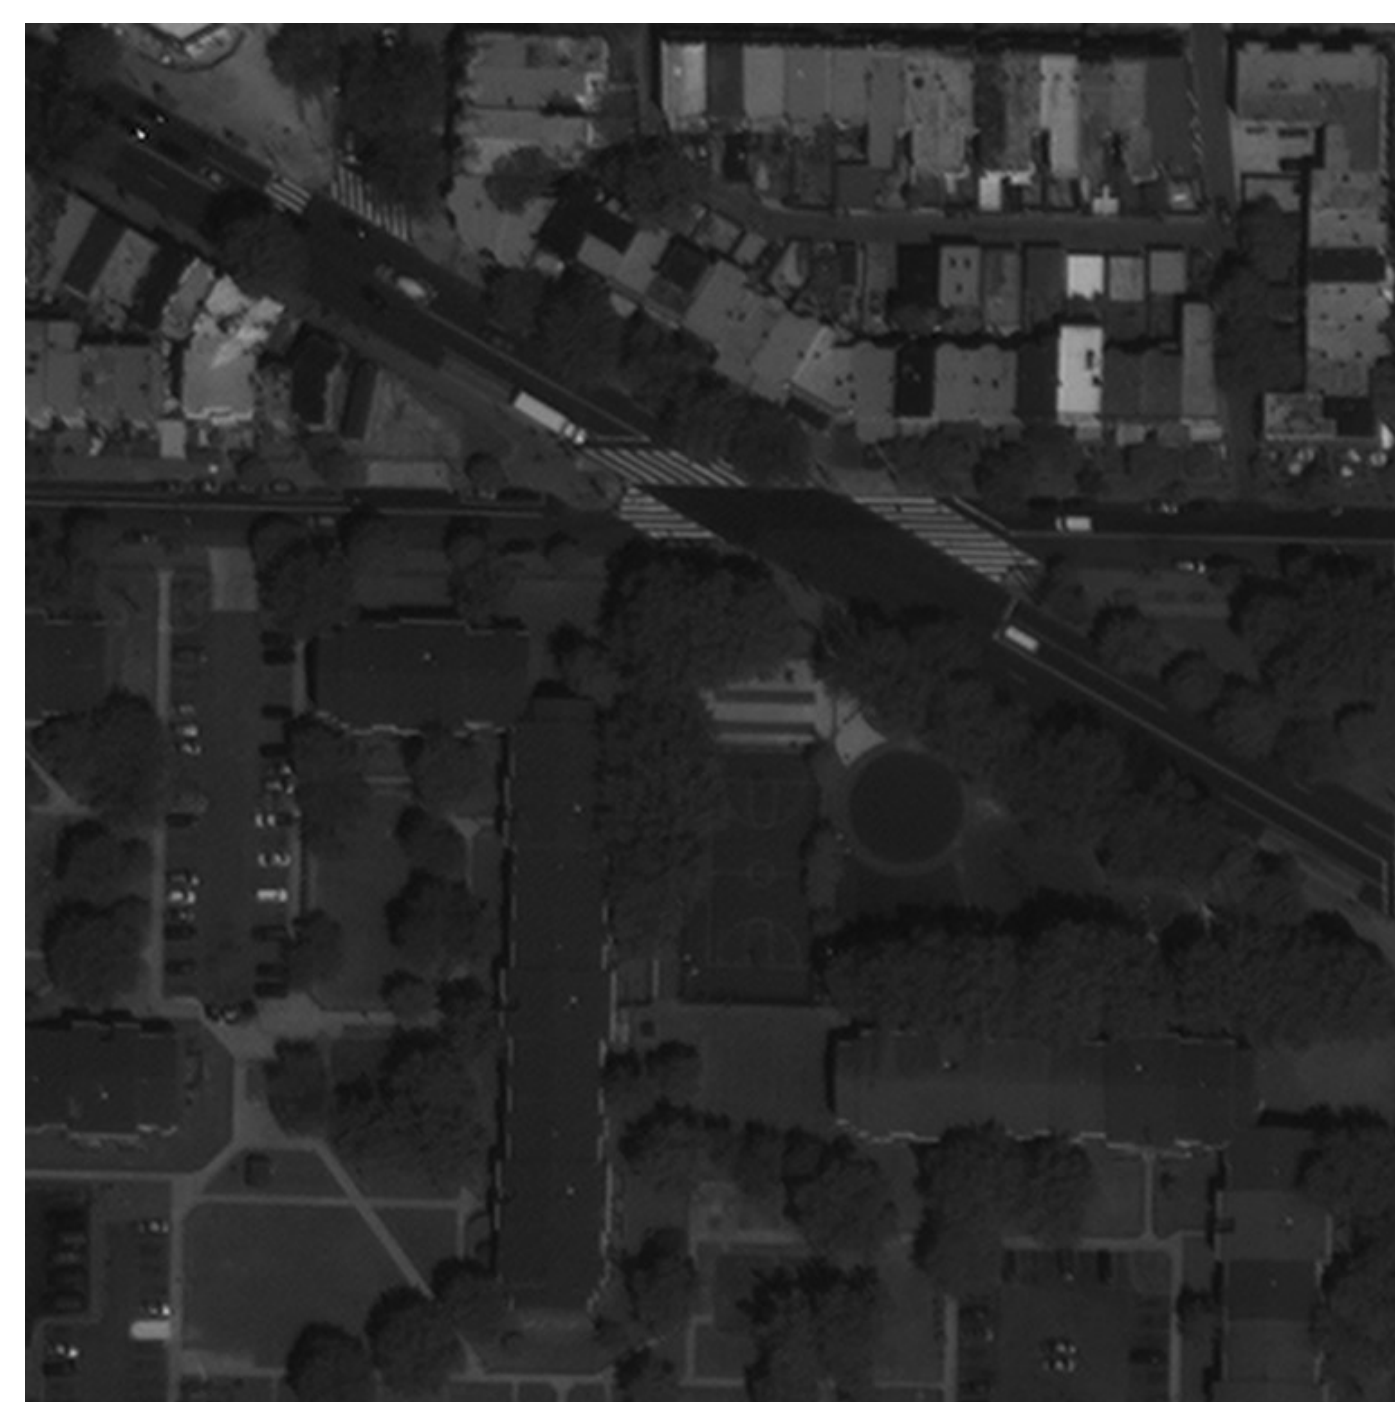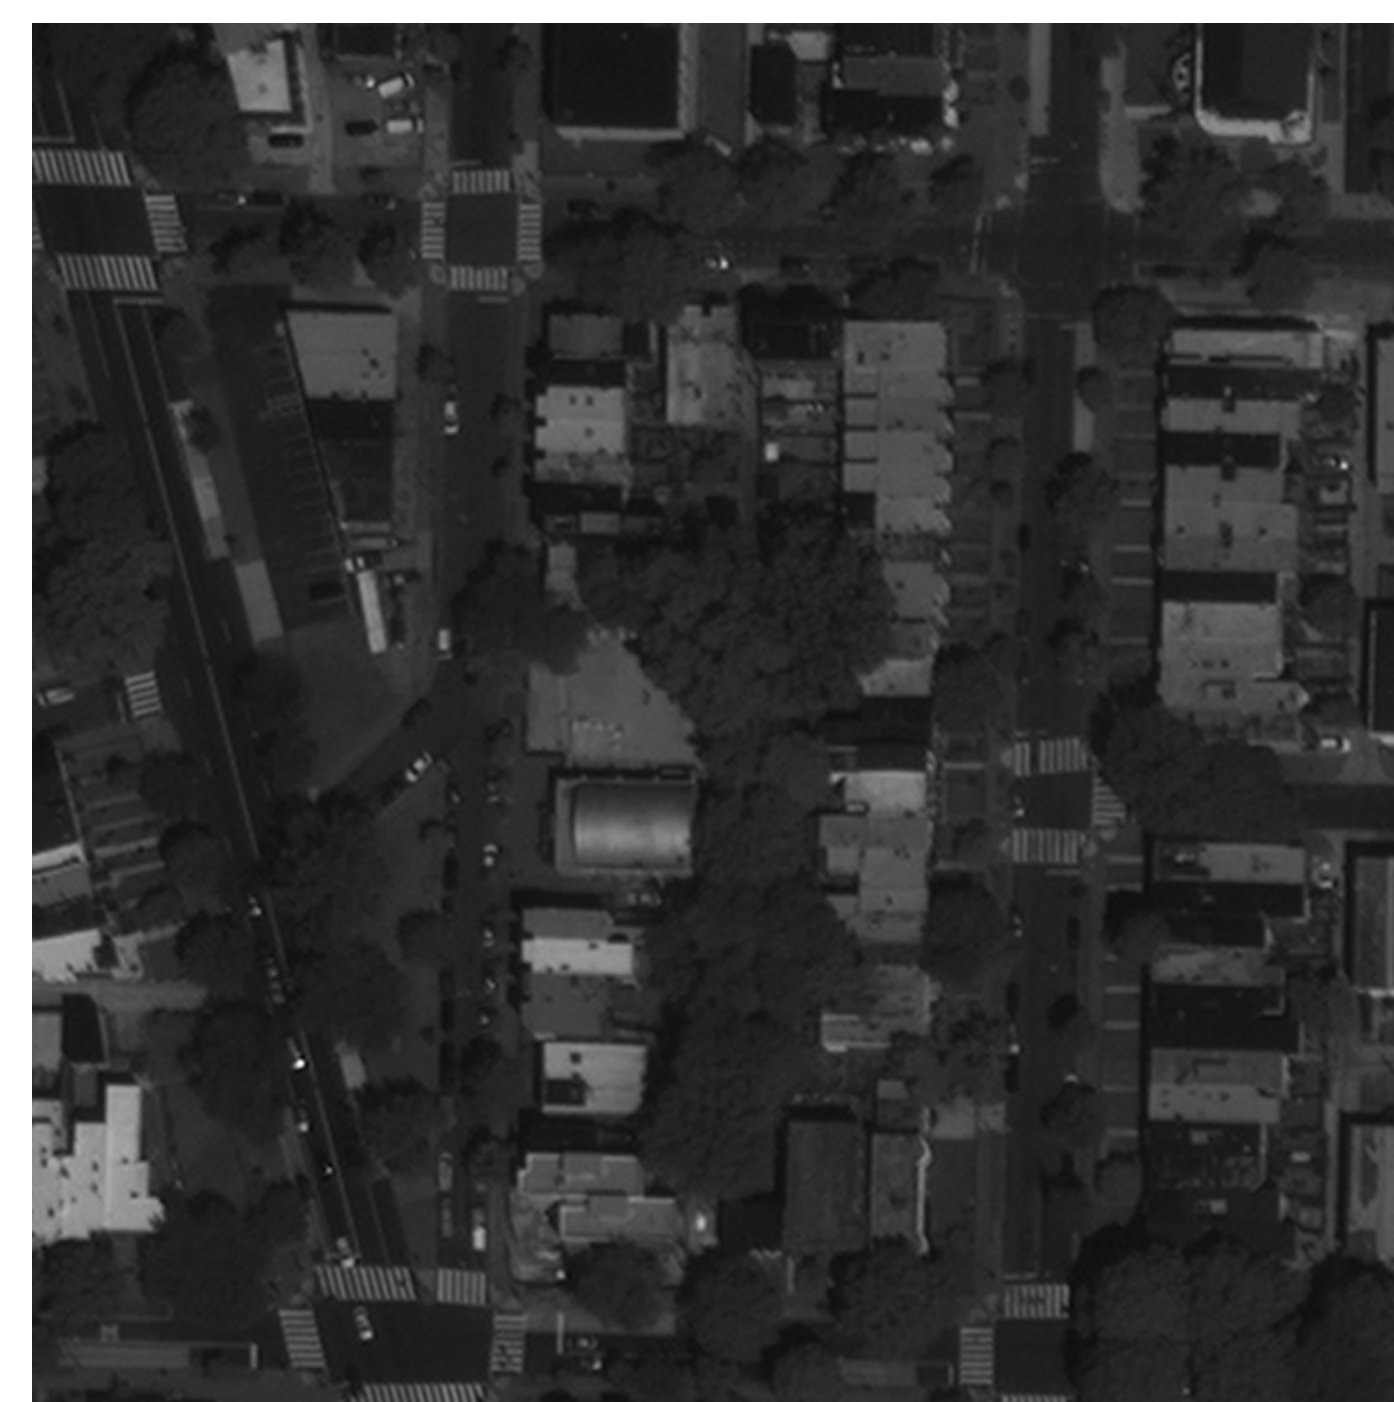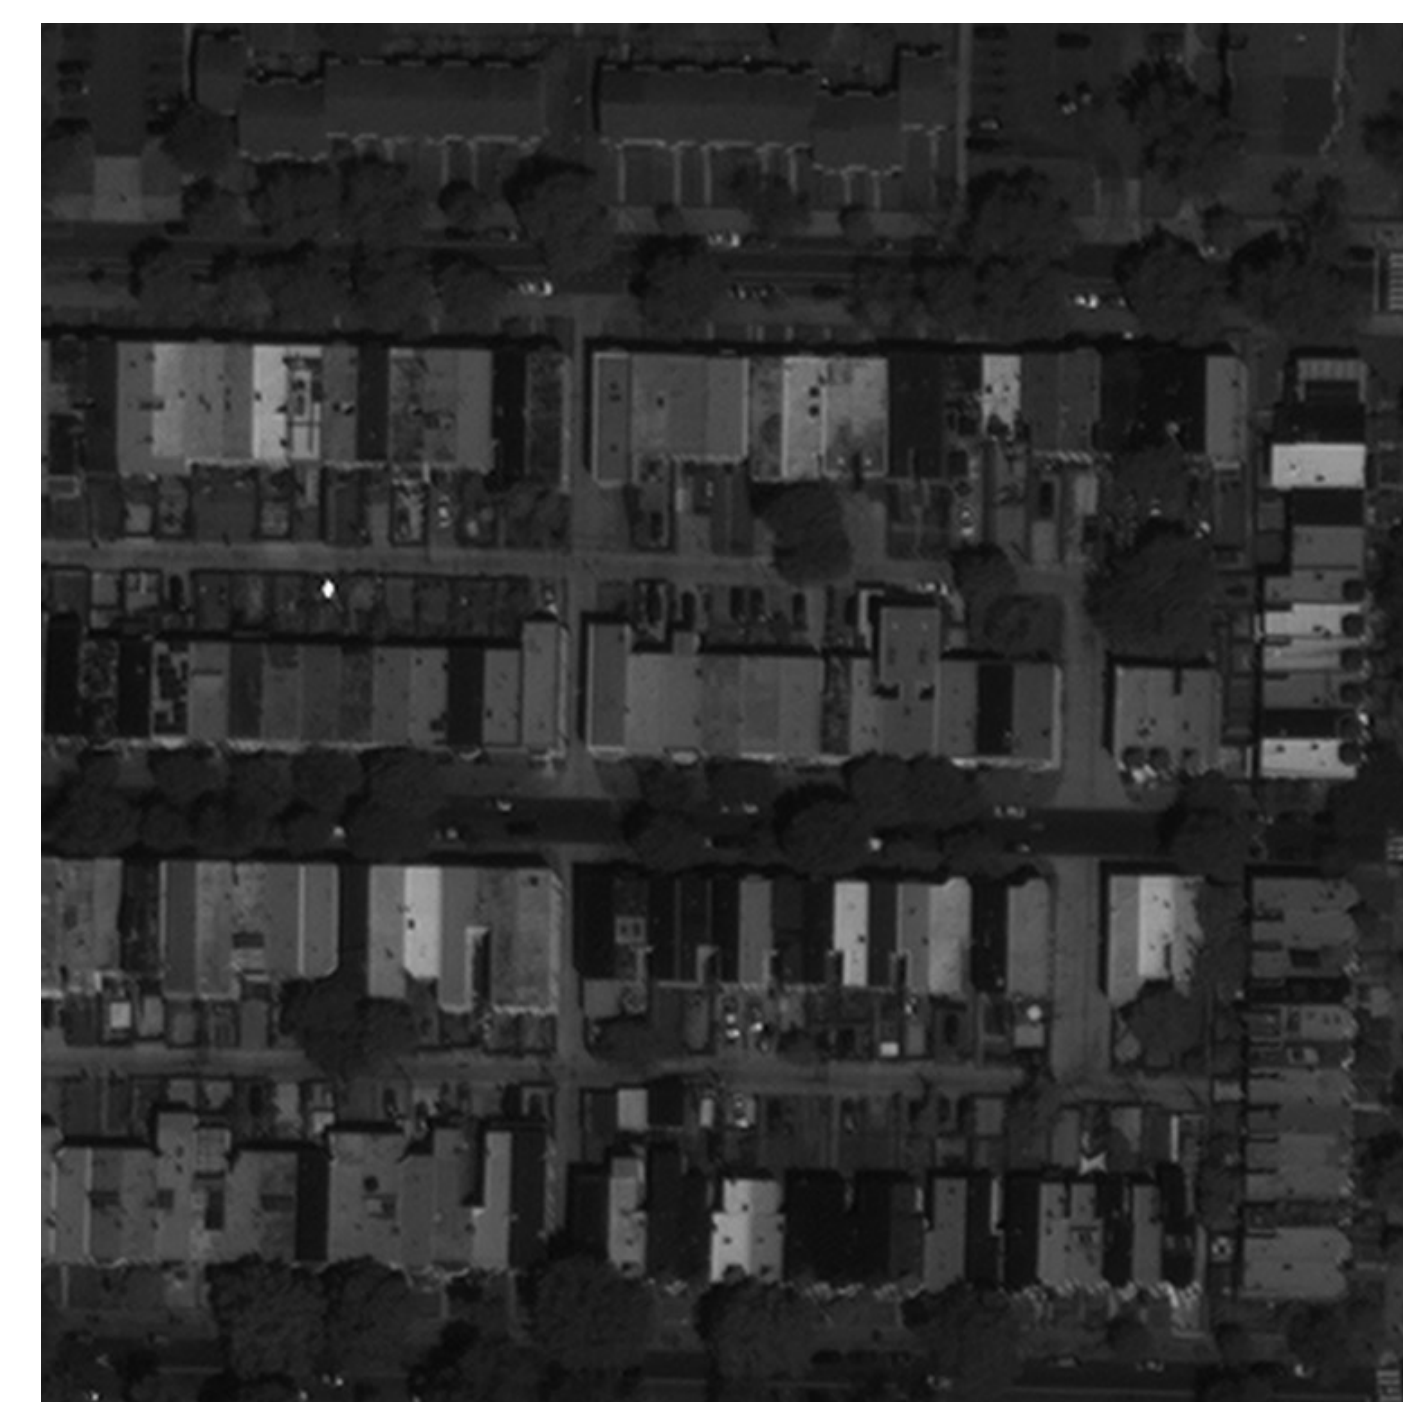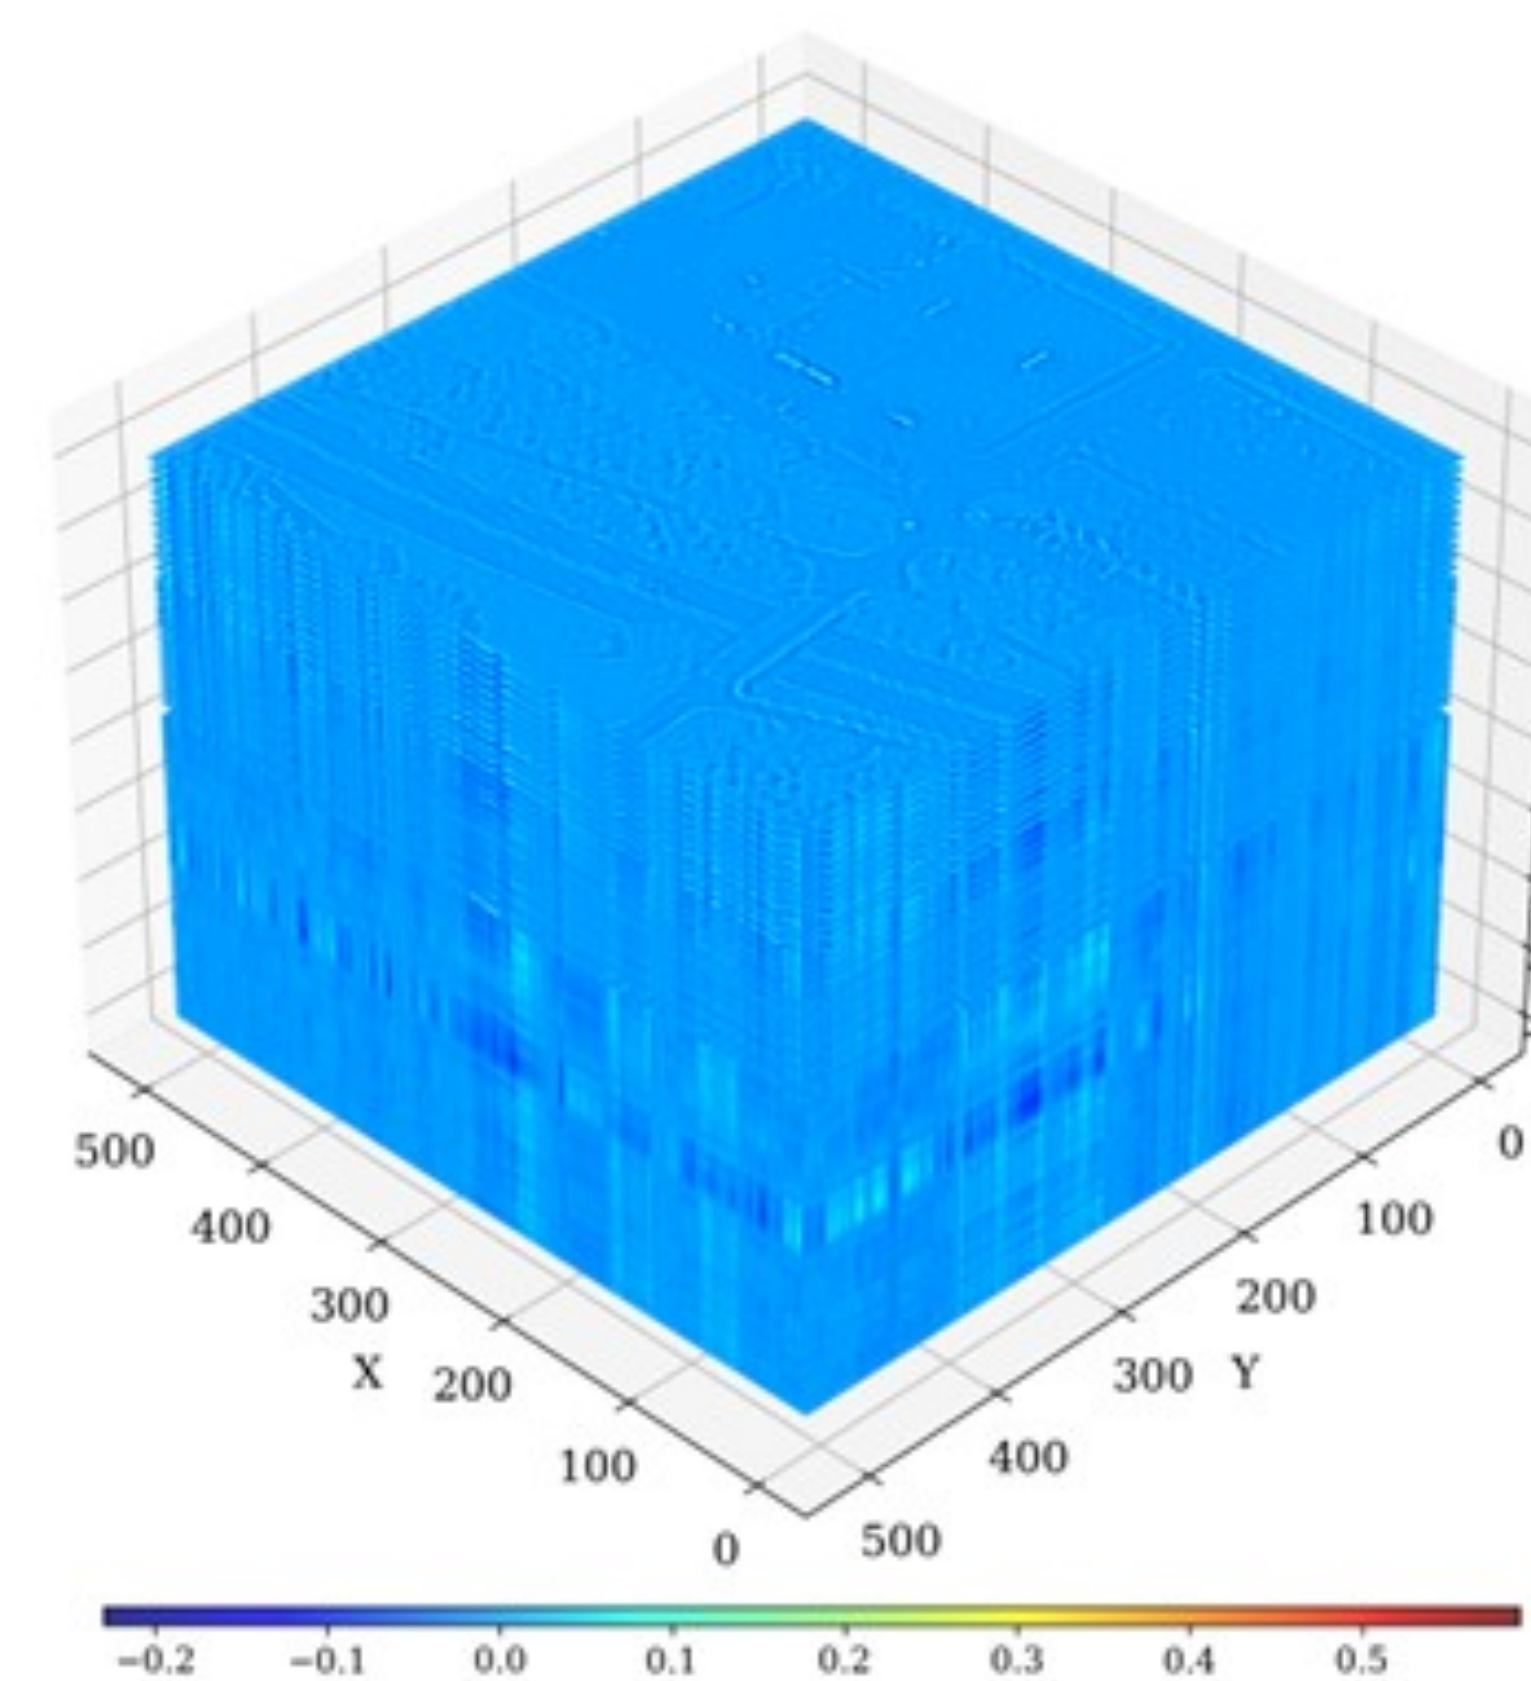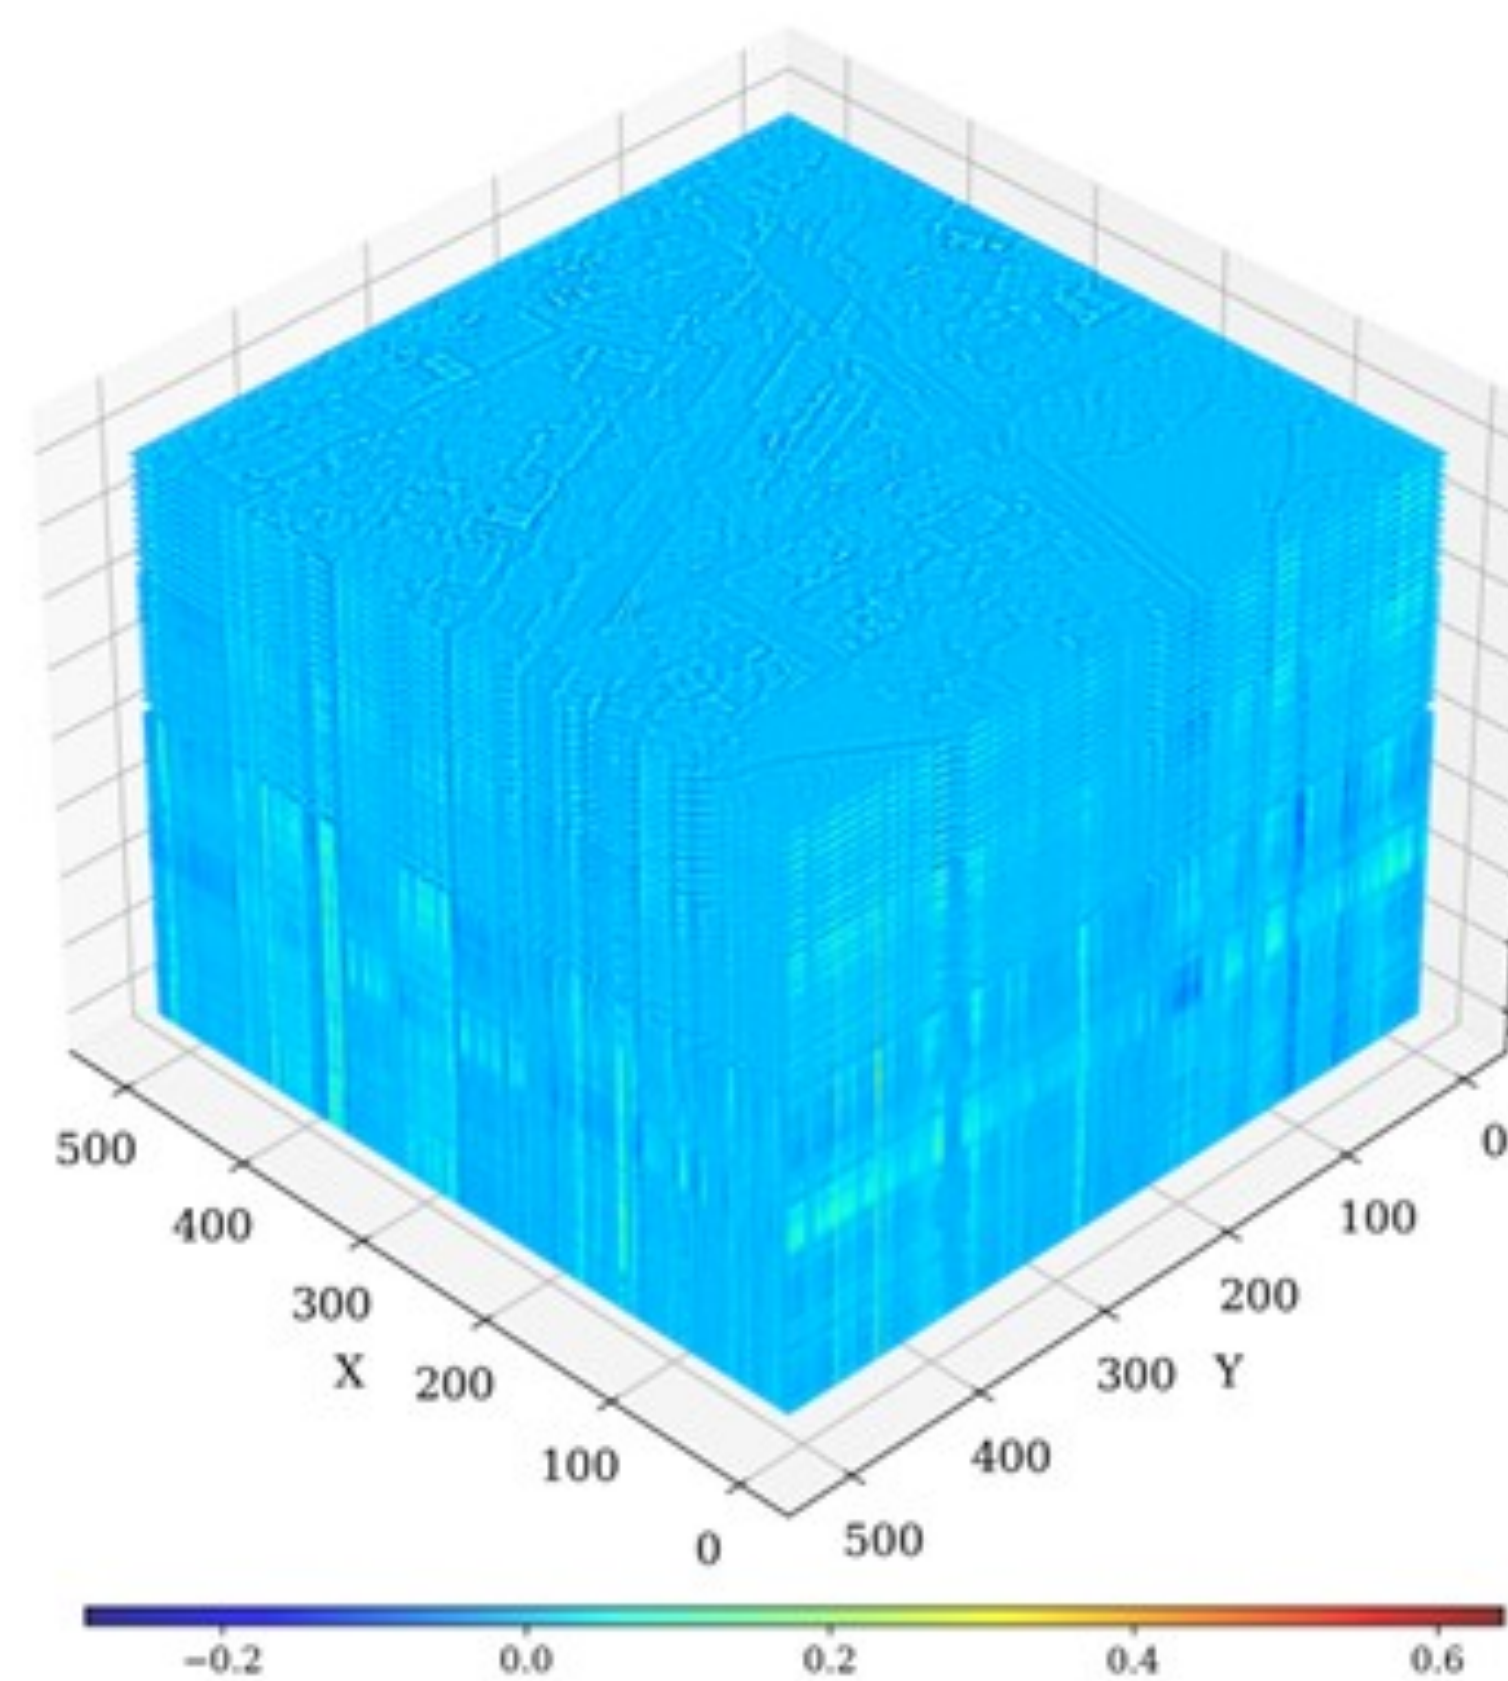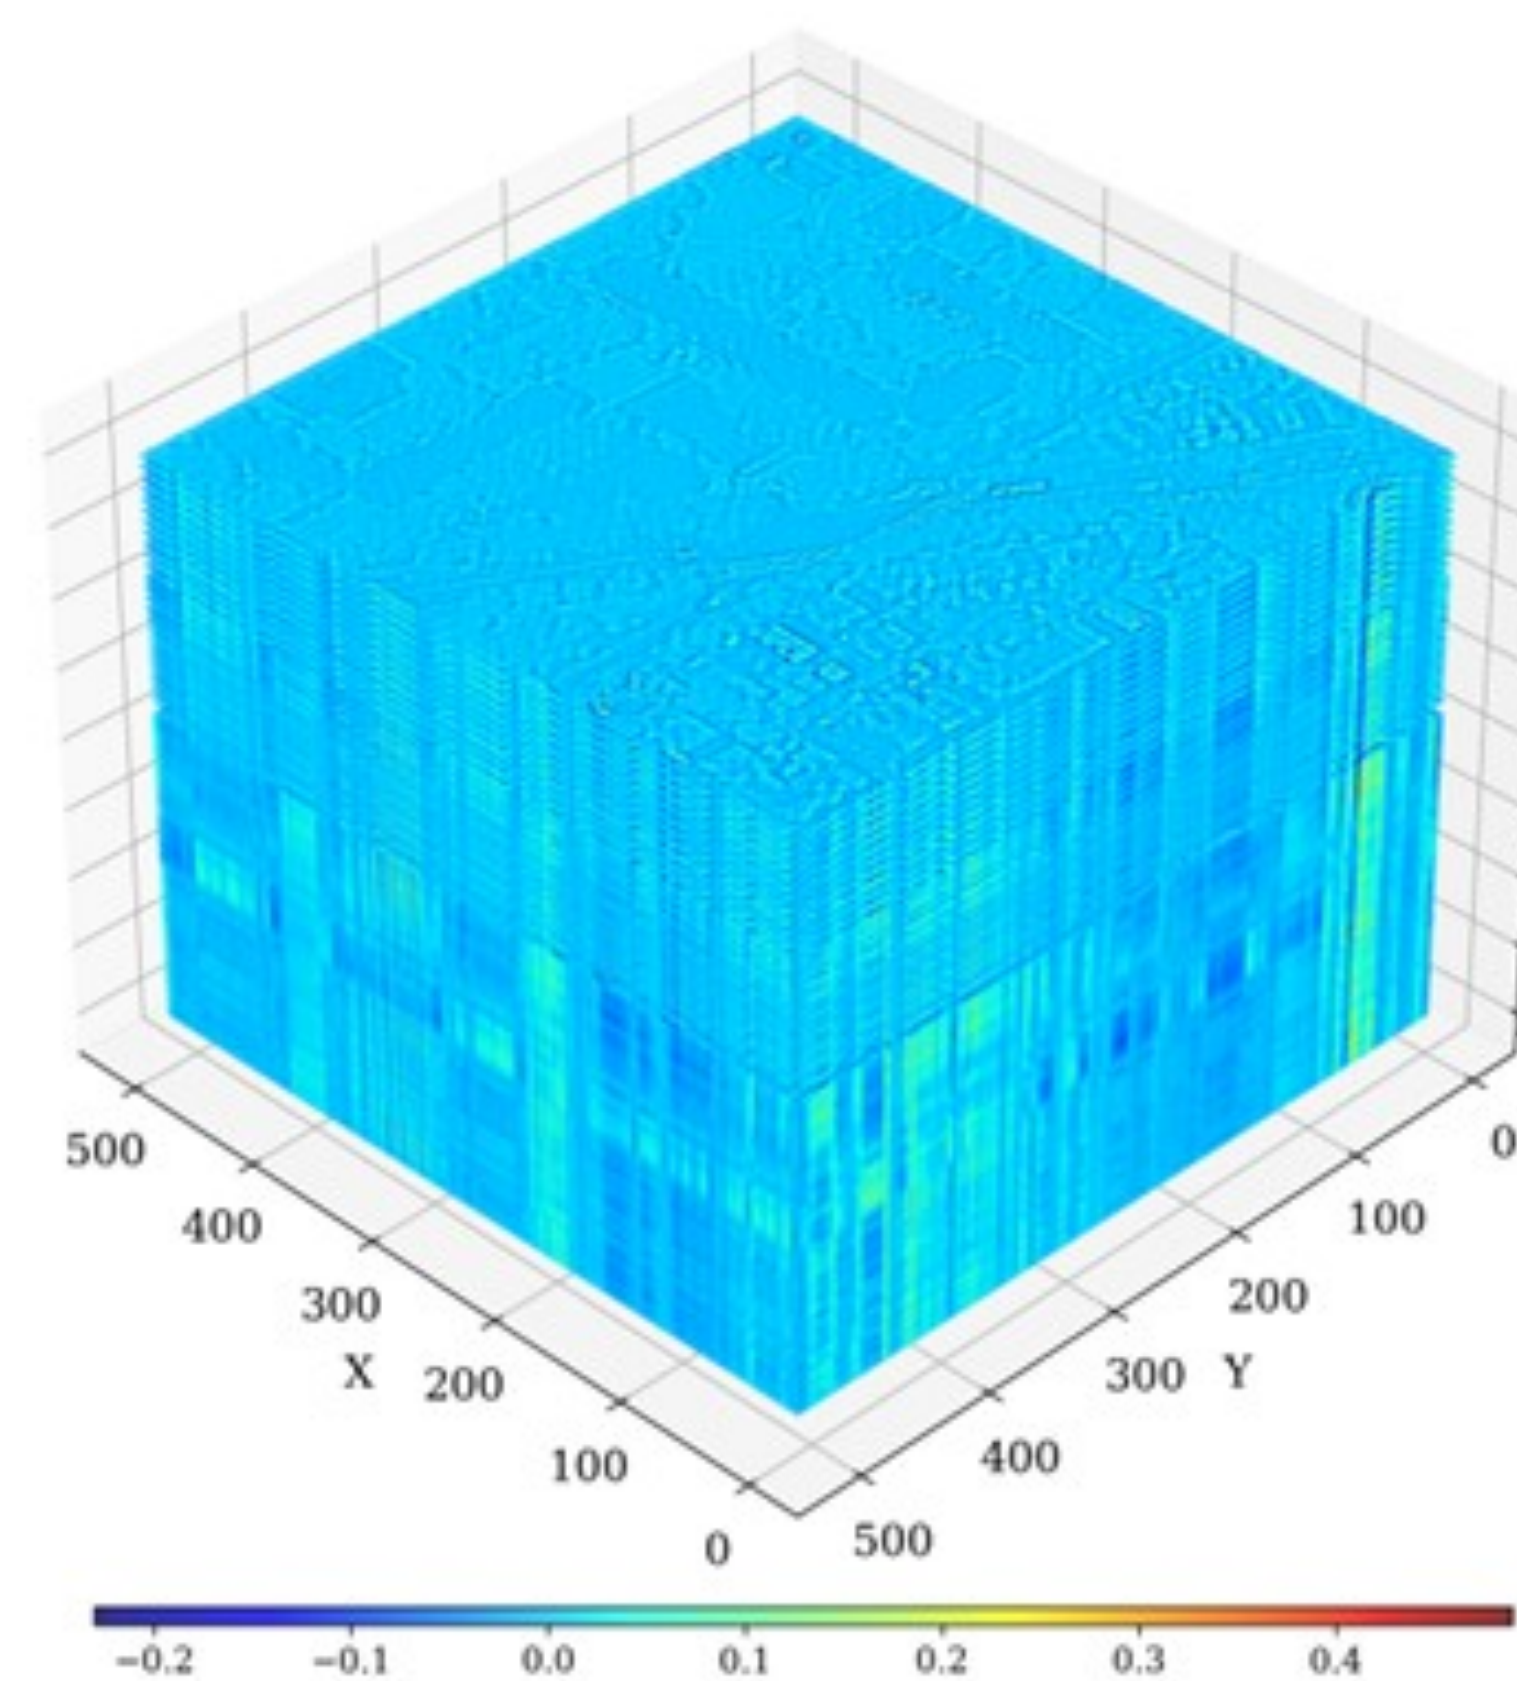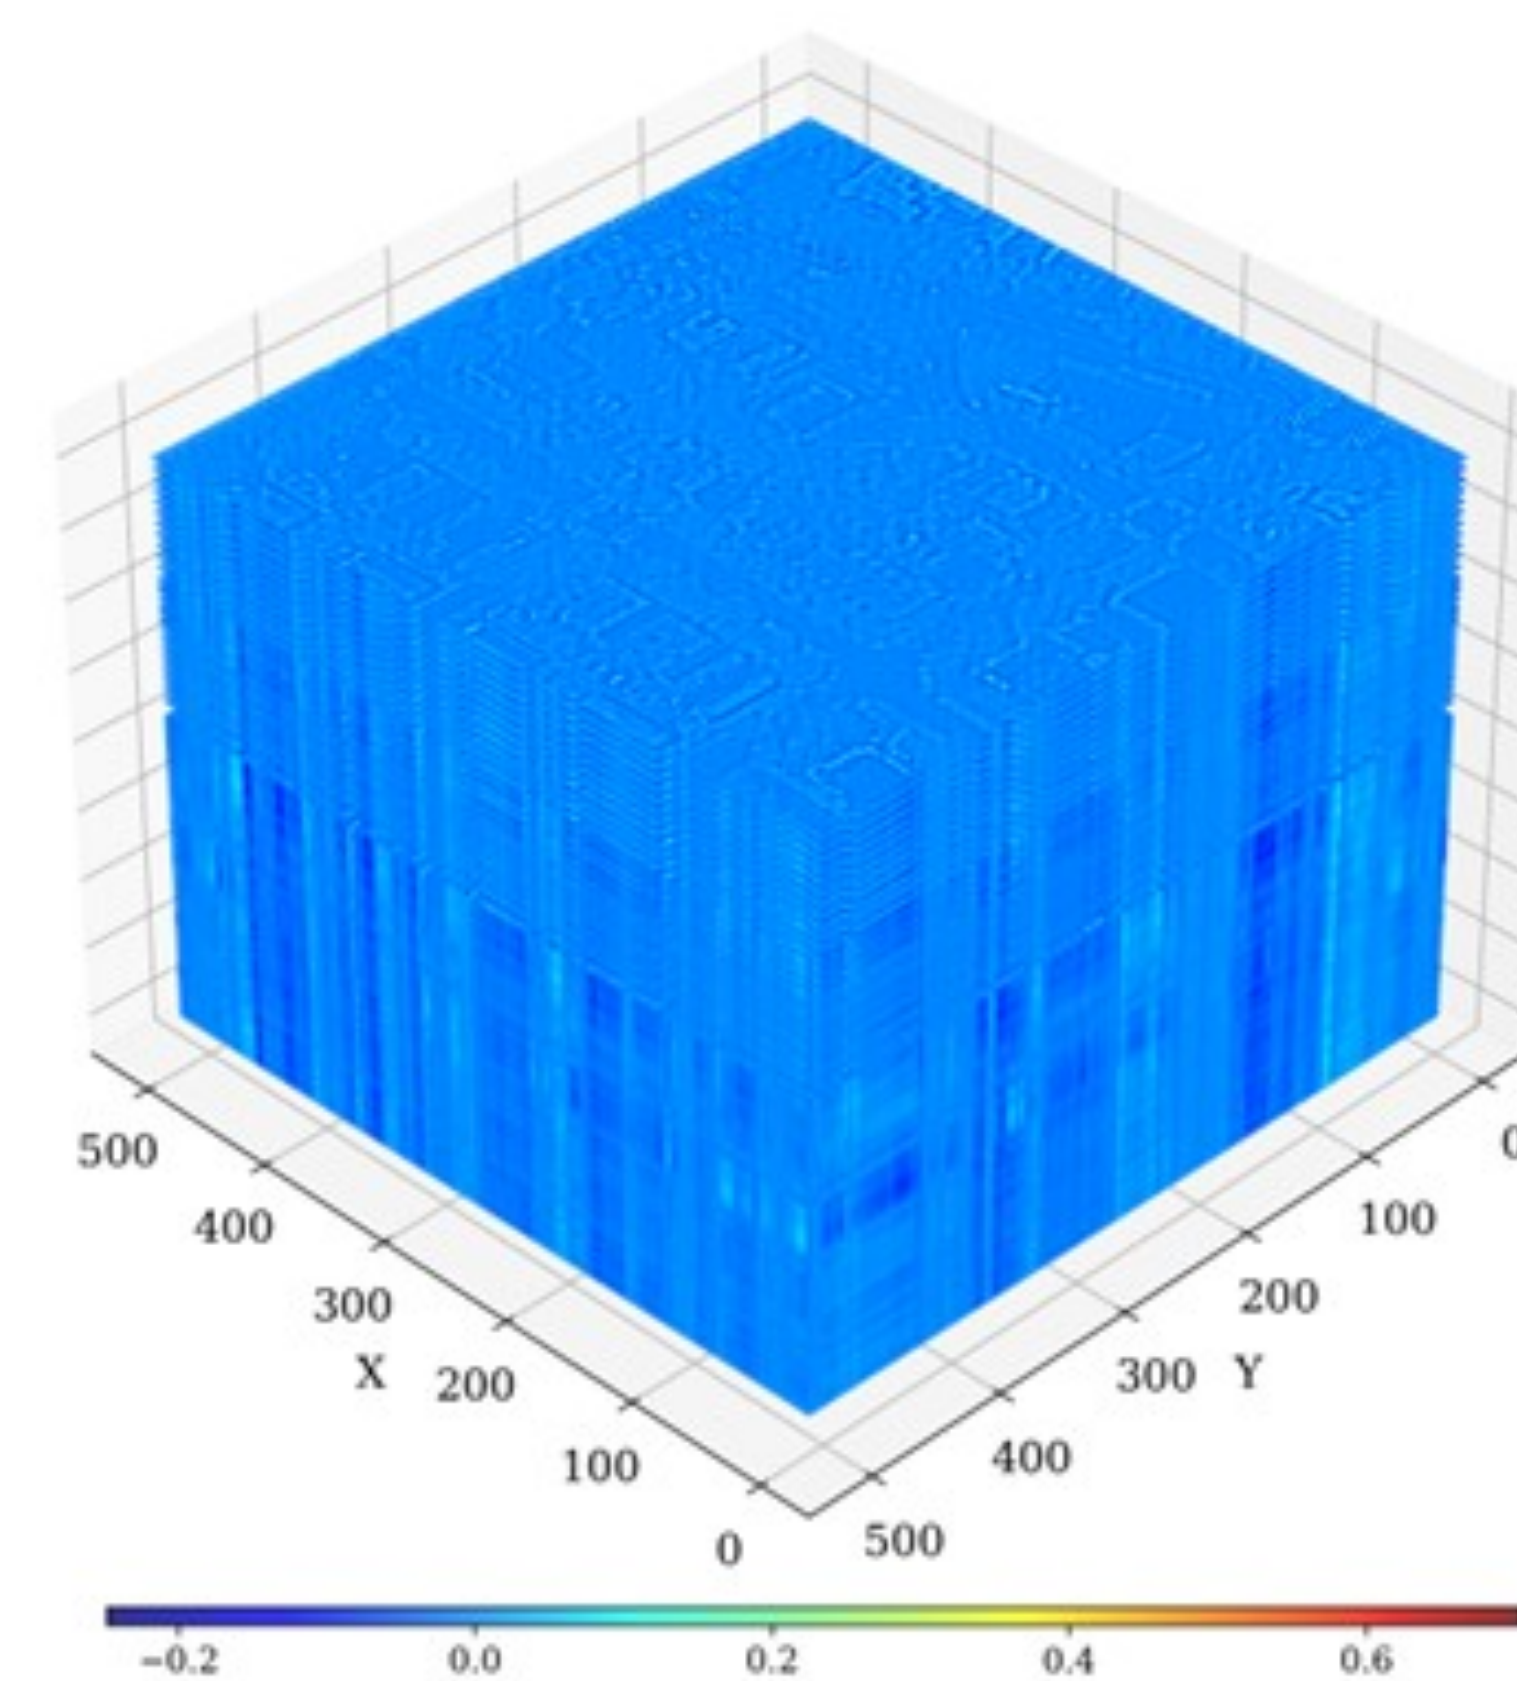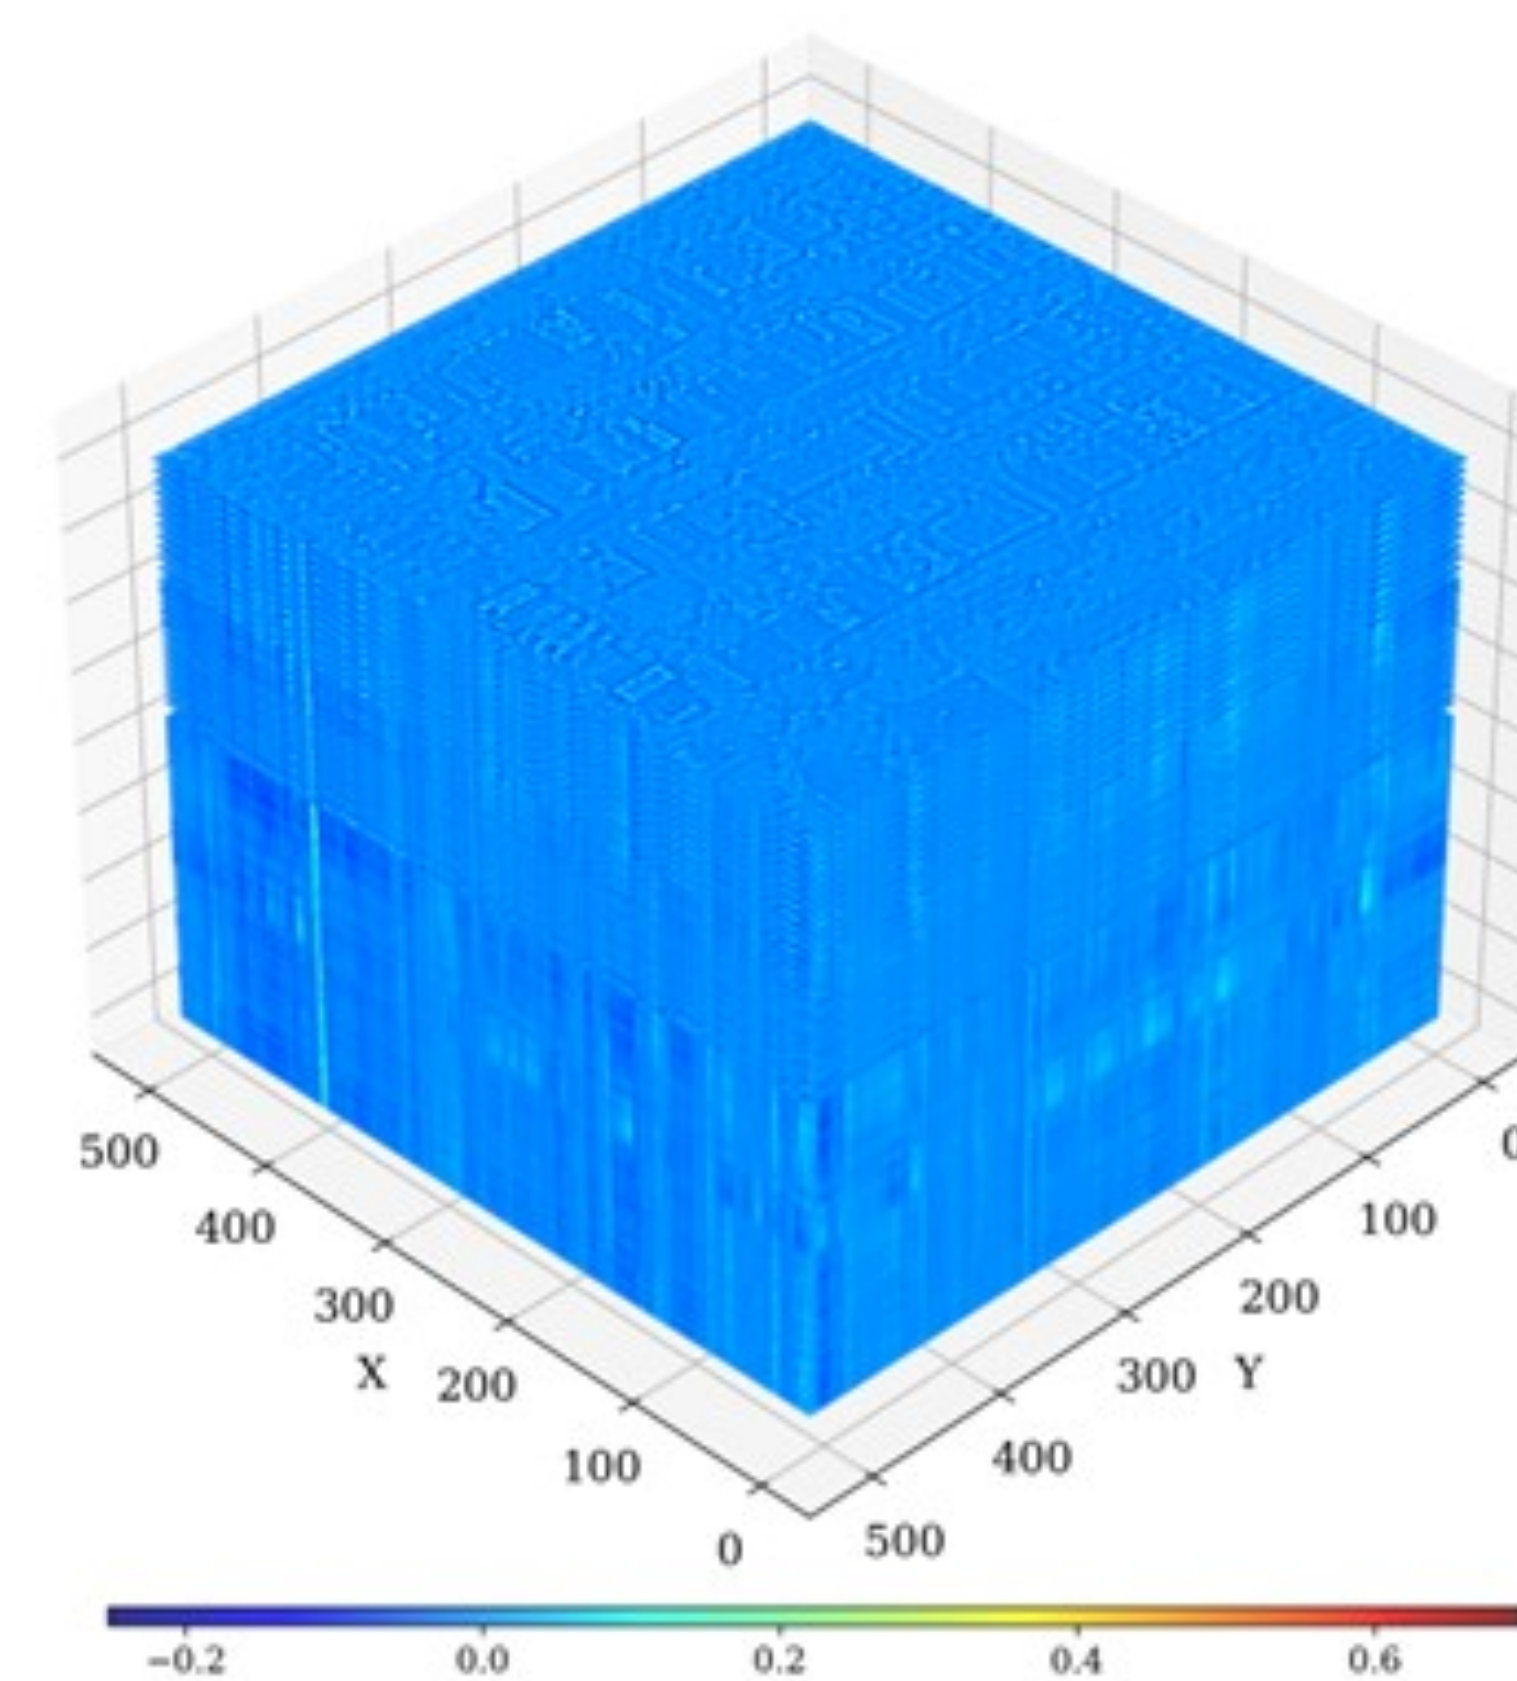

Supplement: supplementary_material [file vis_radiance_wv2.pdf › 6758_Physics-informed Neural Operator for Pansharpening_supplementary_material/vis_radiance_wv2.pdf]

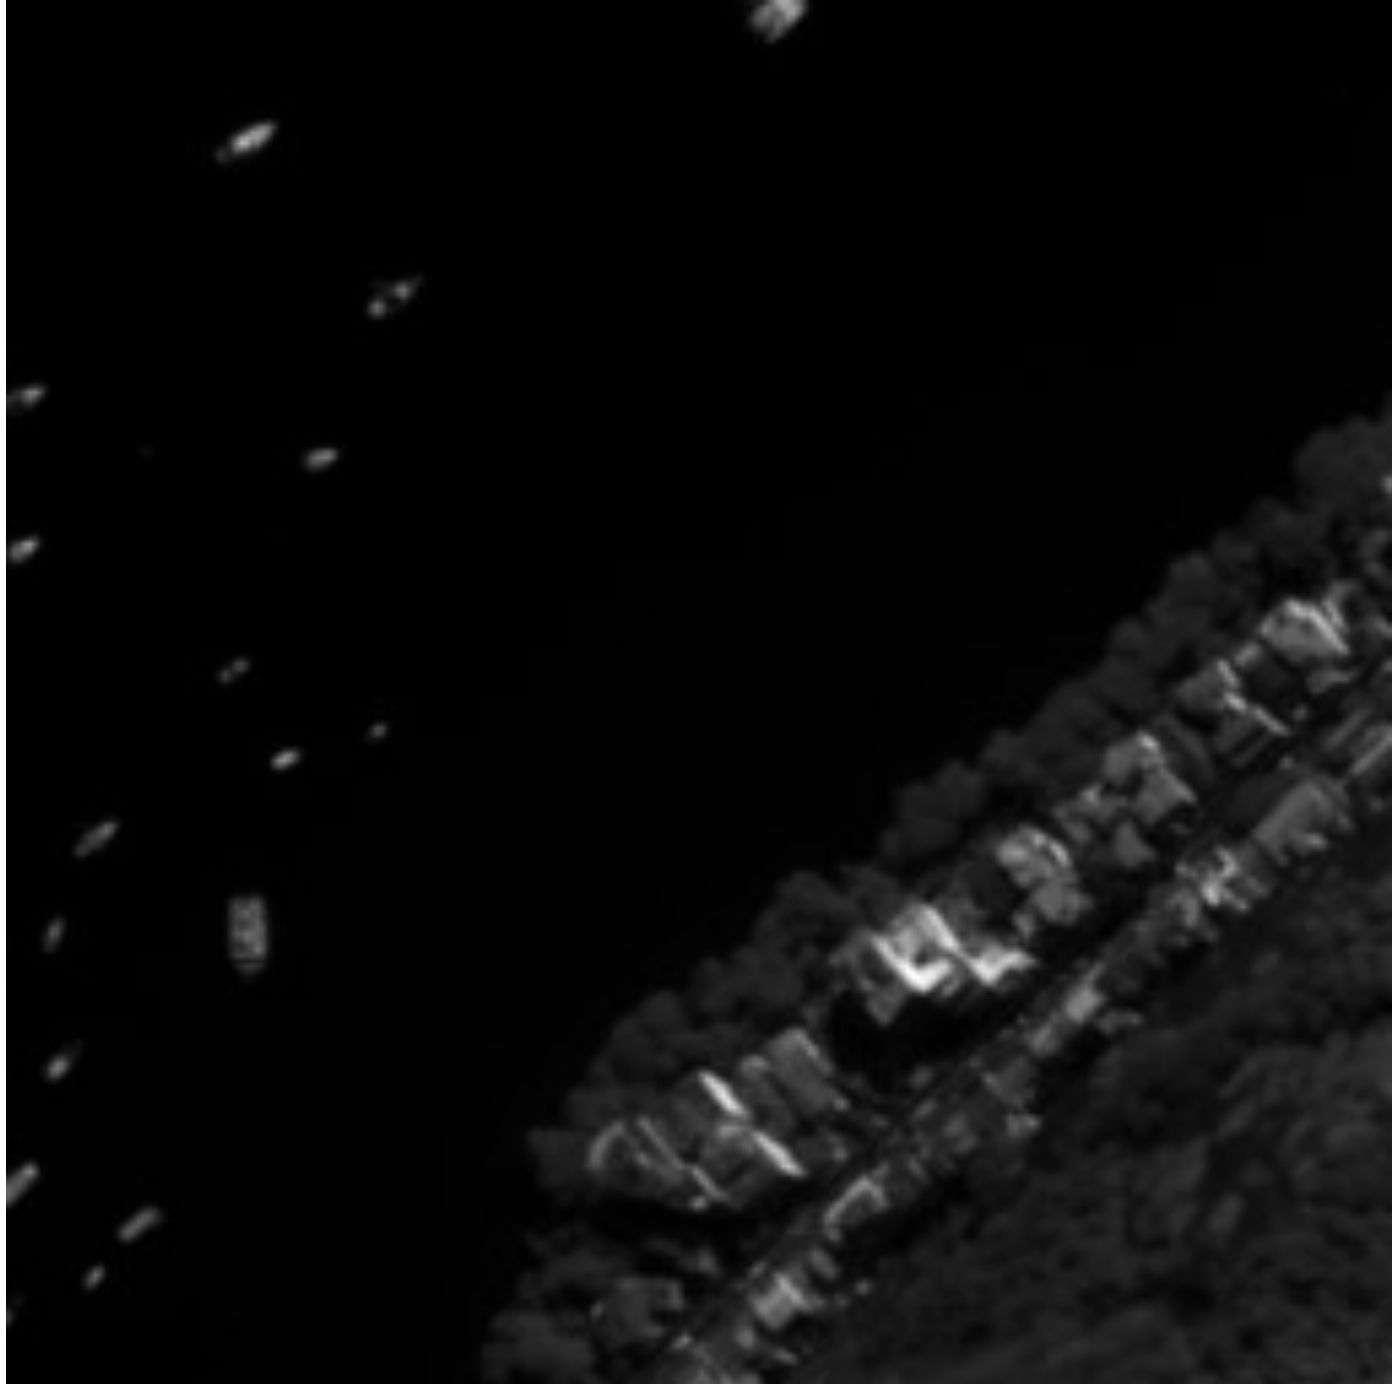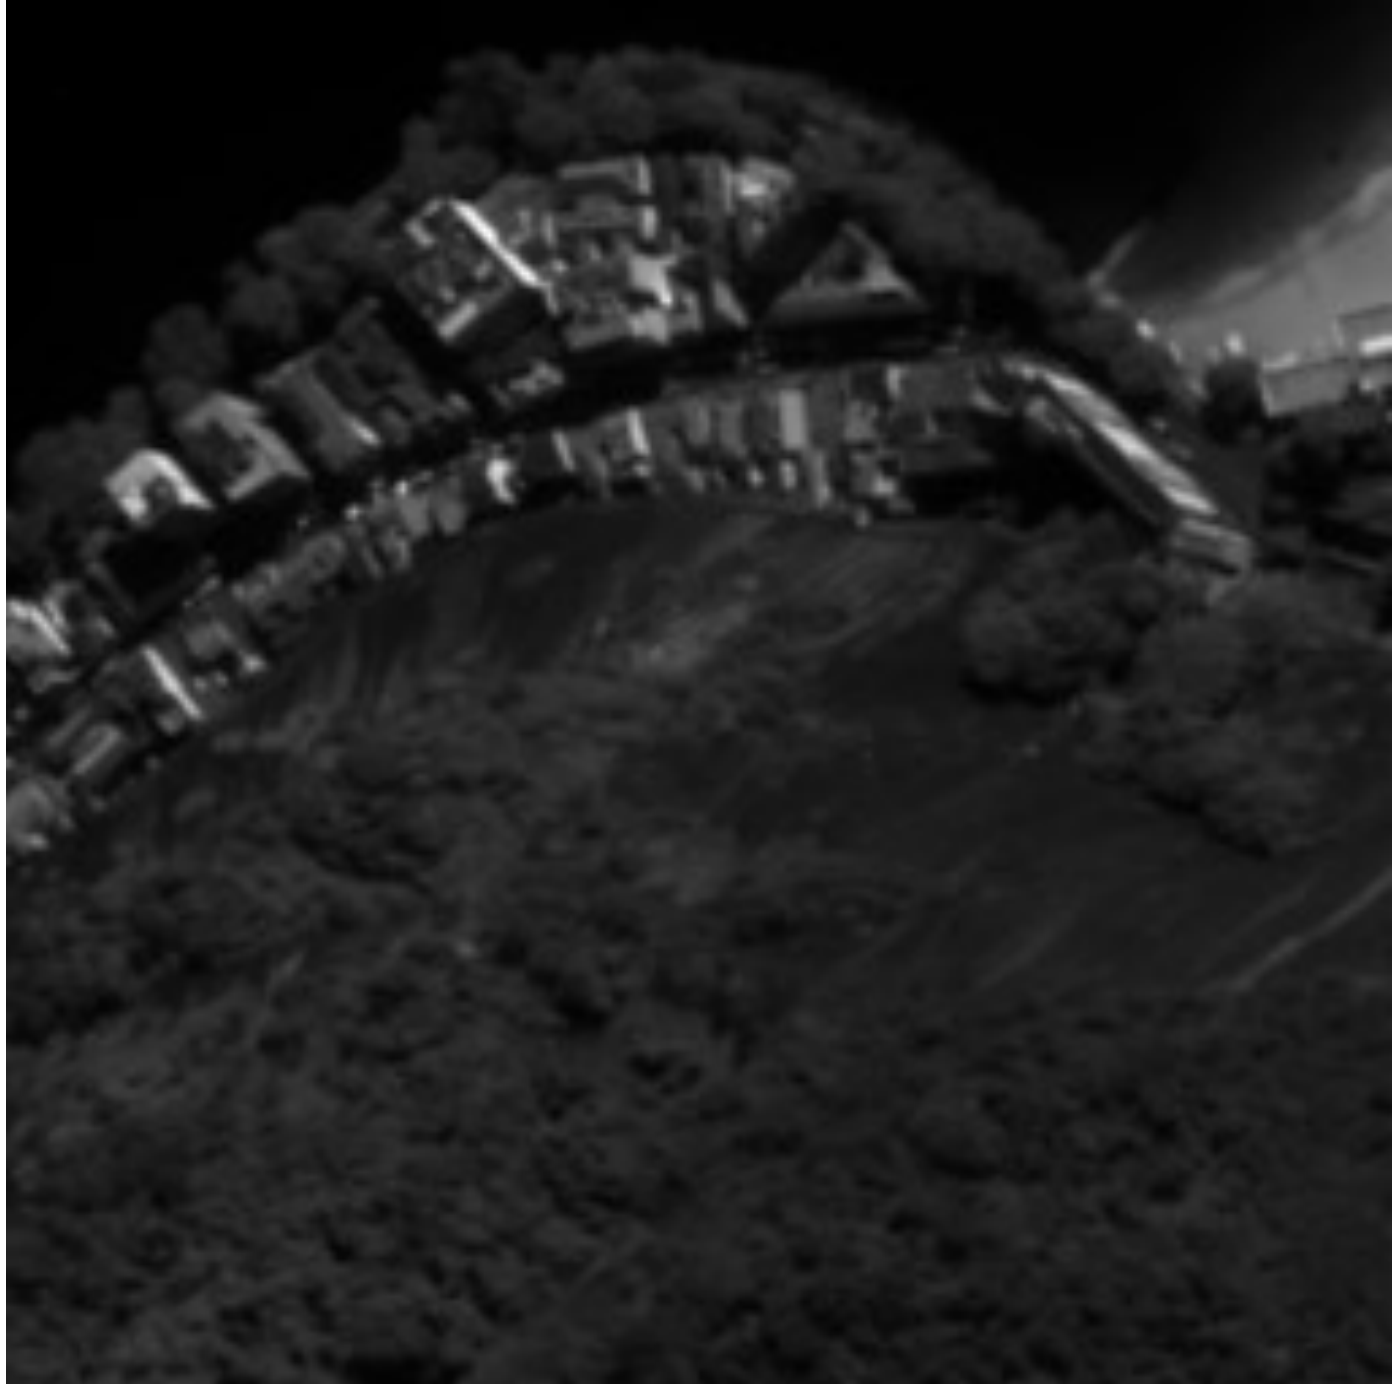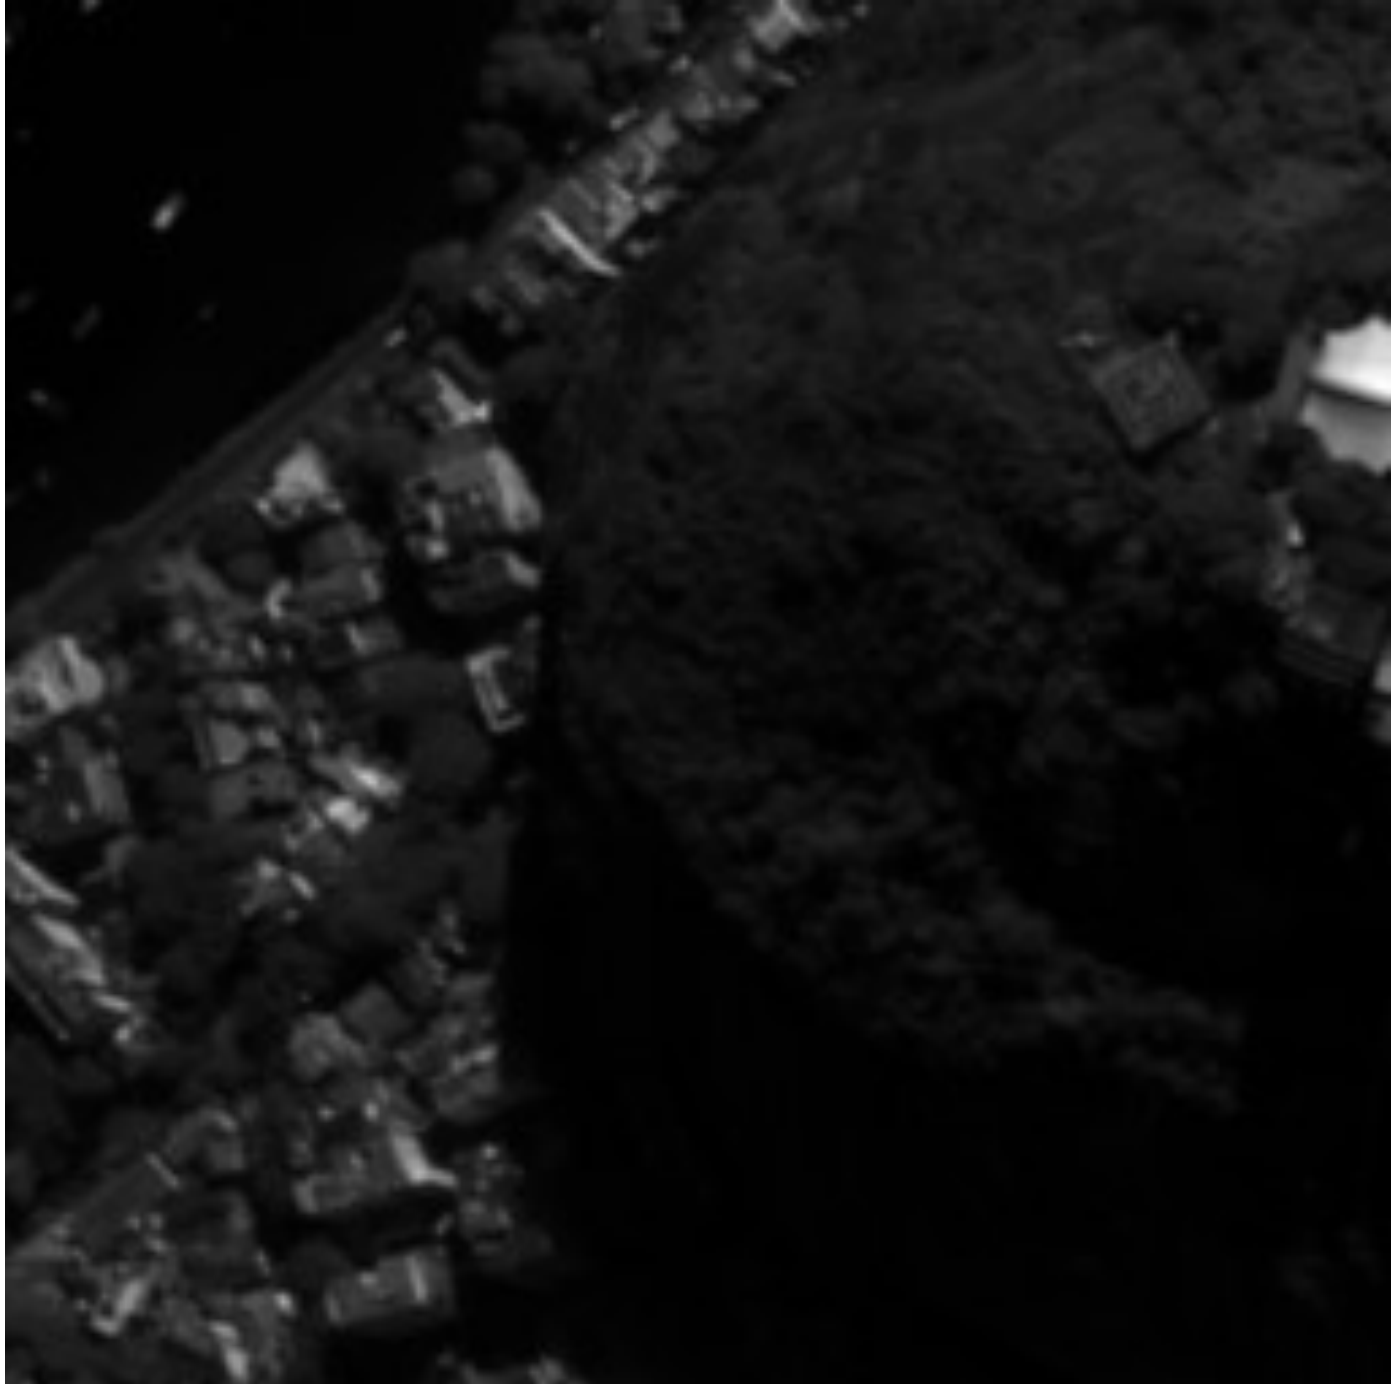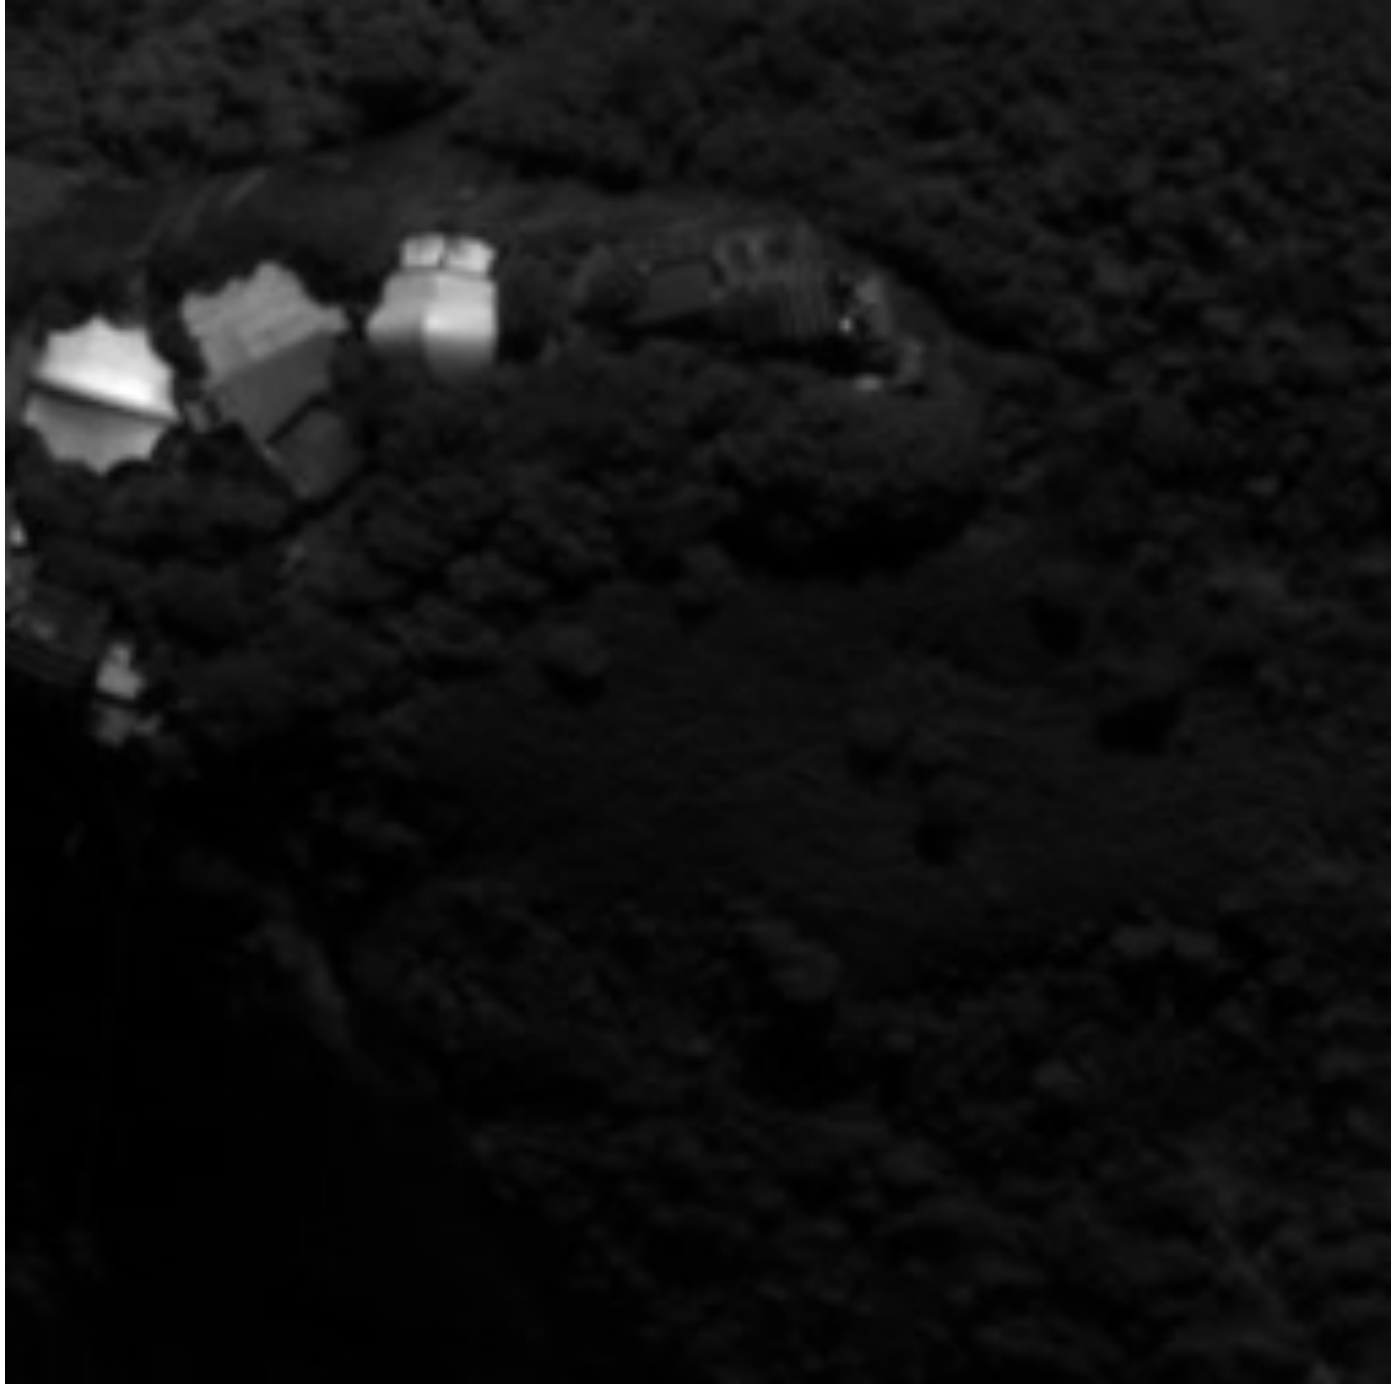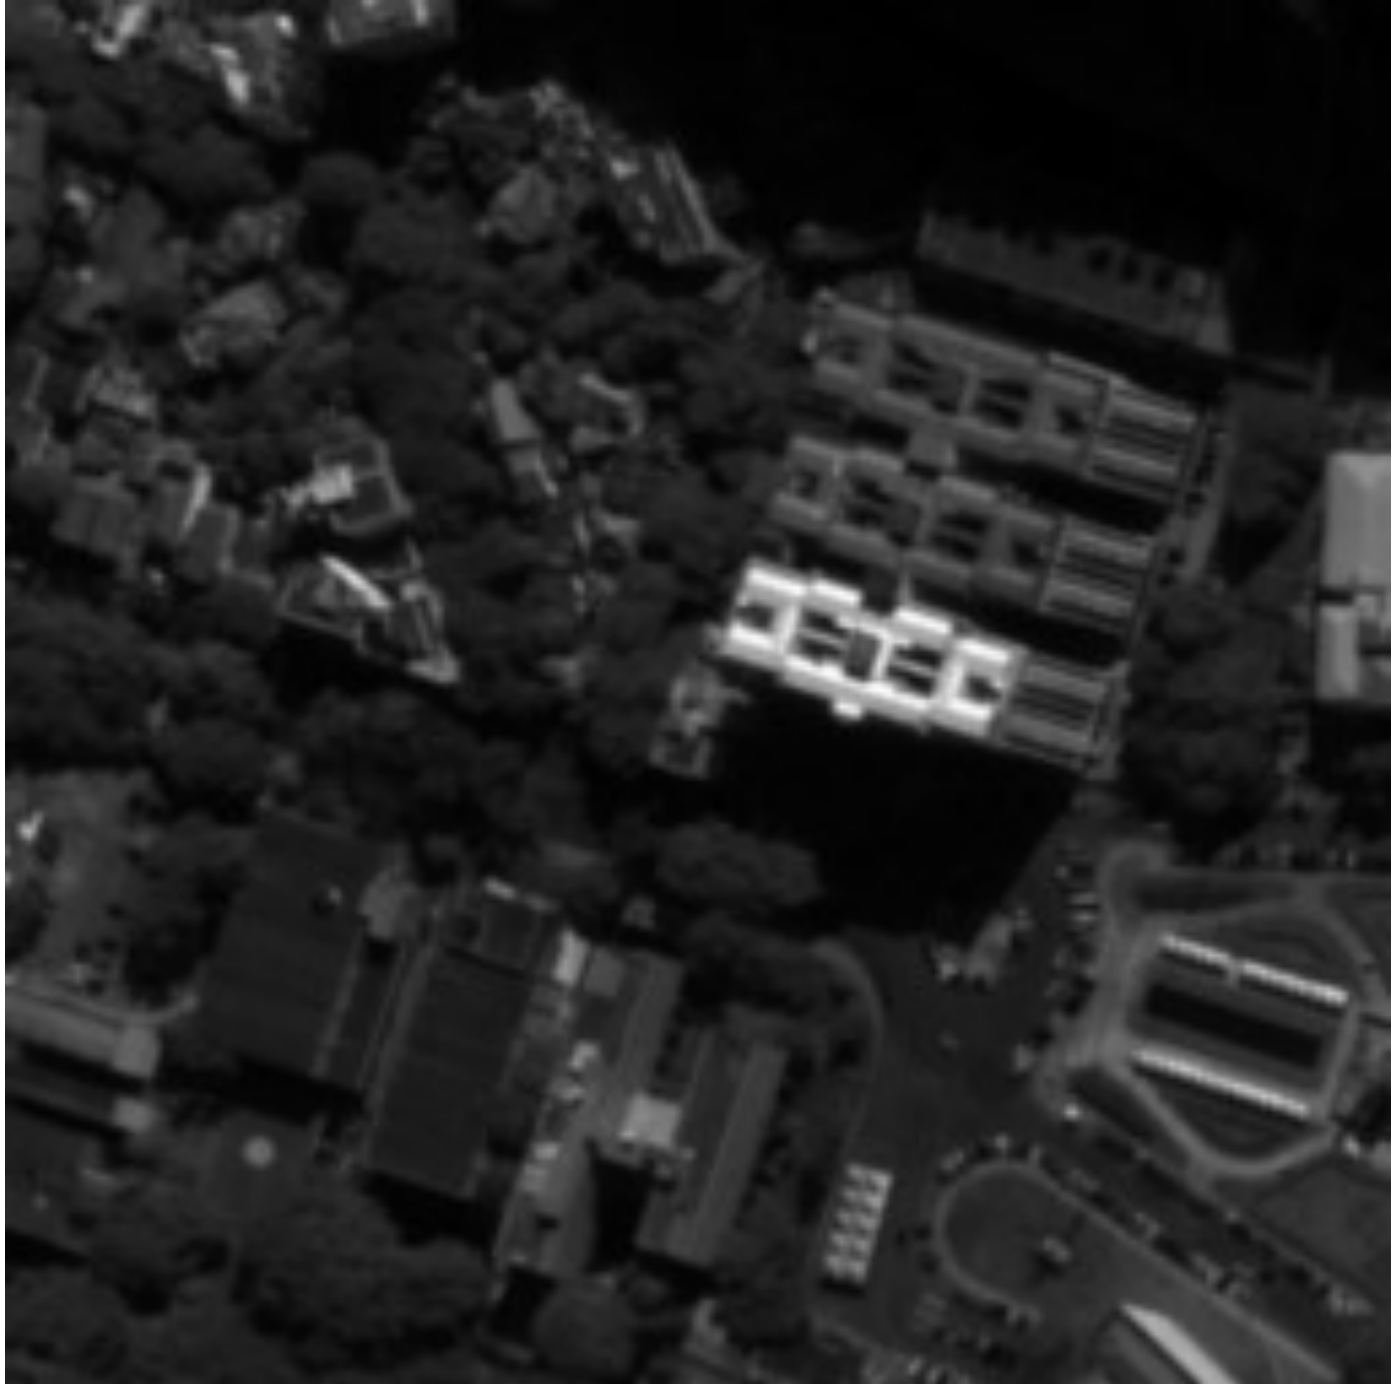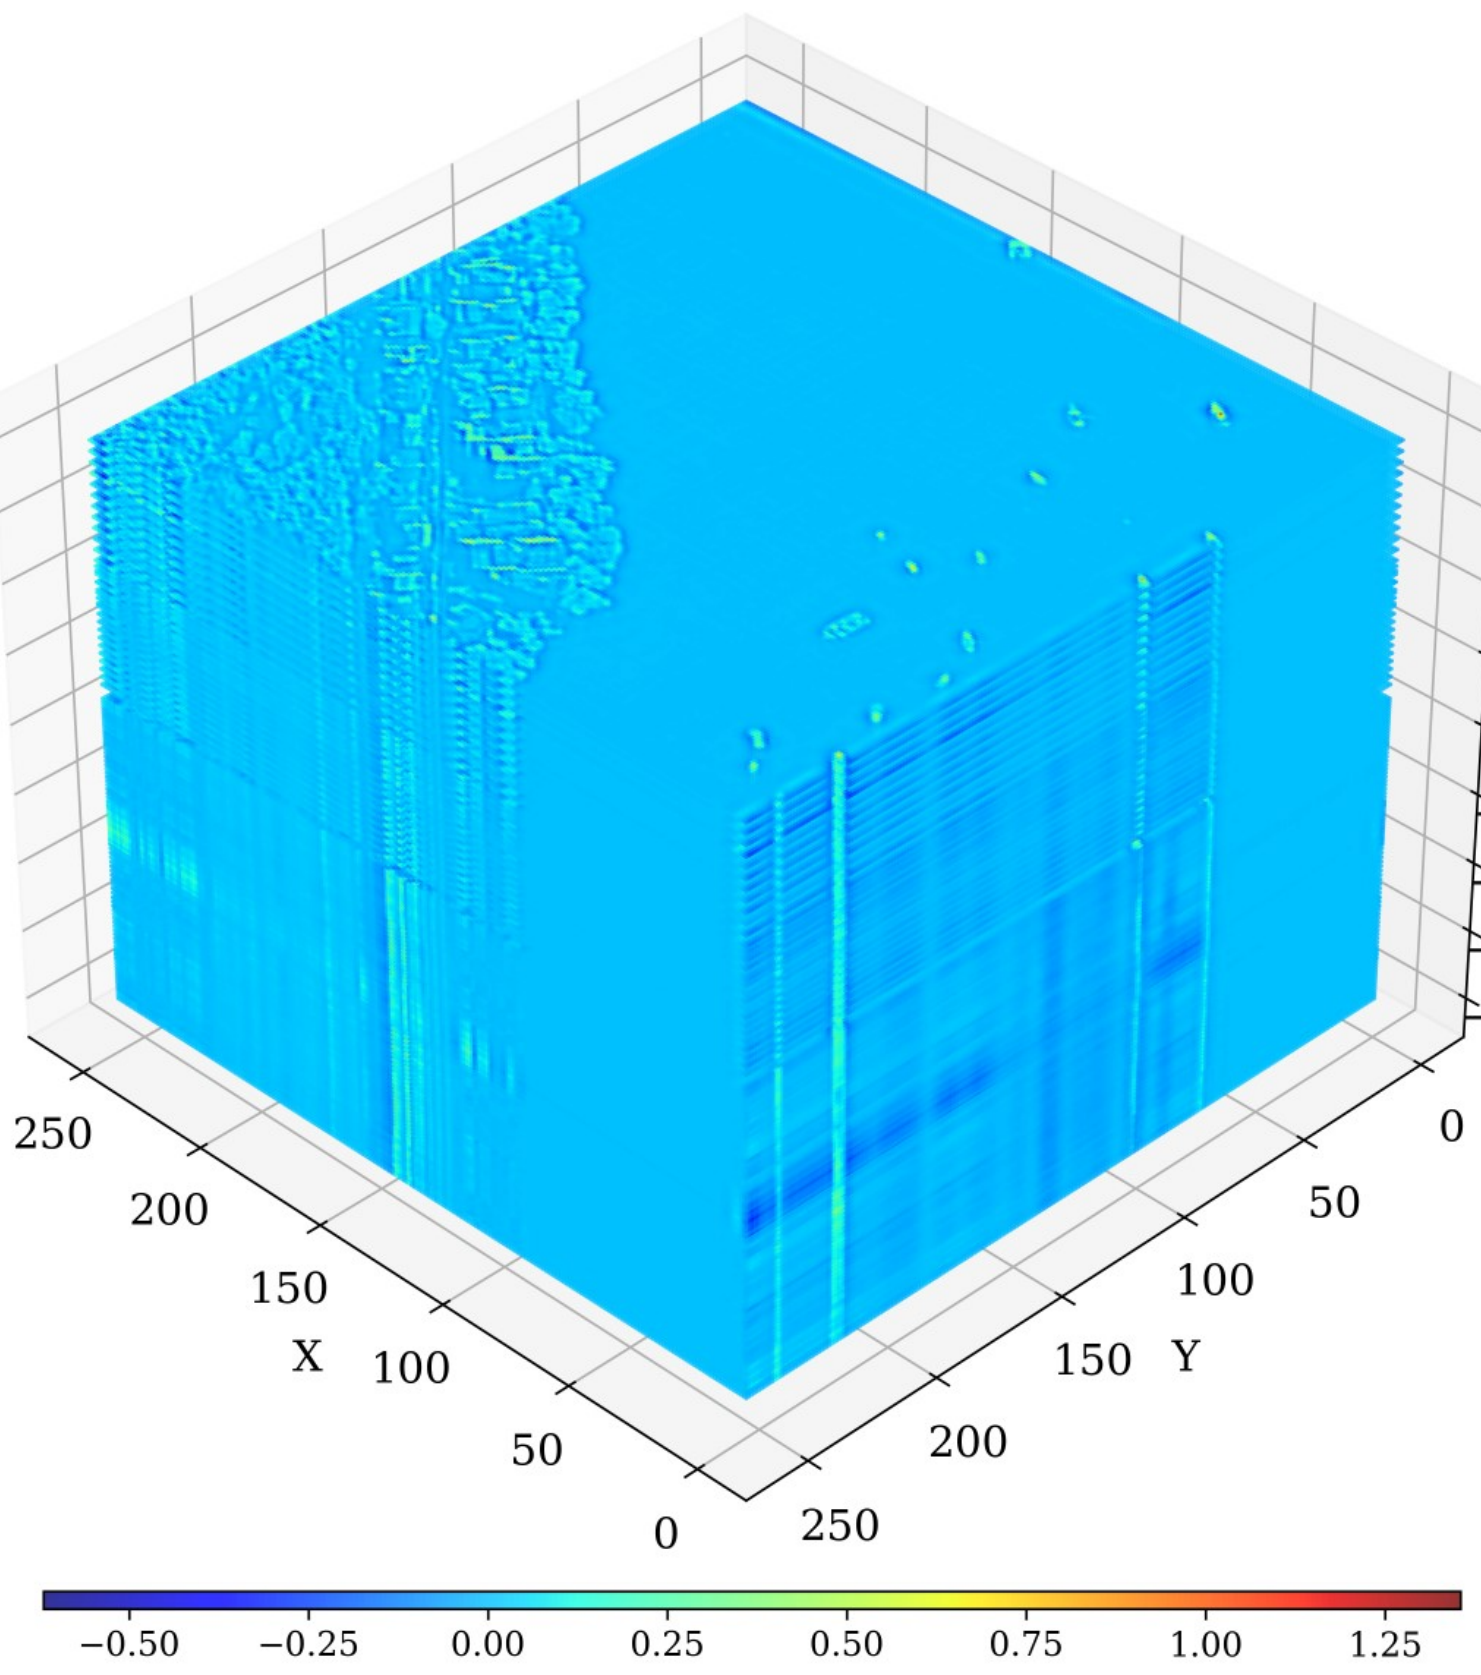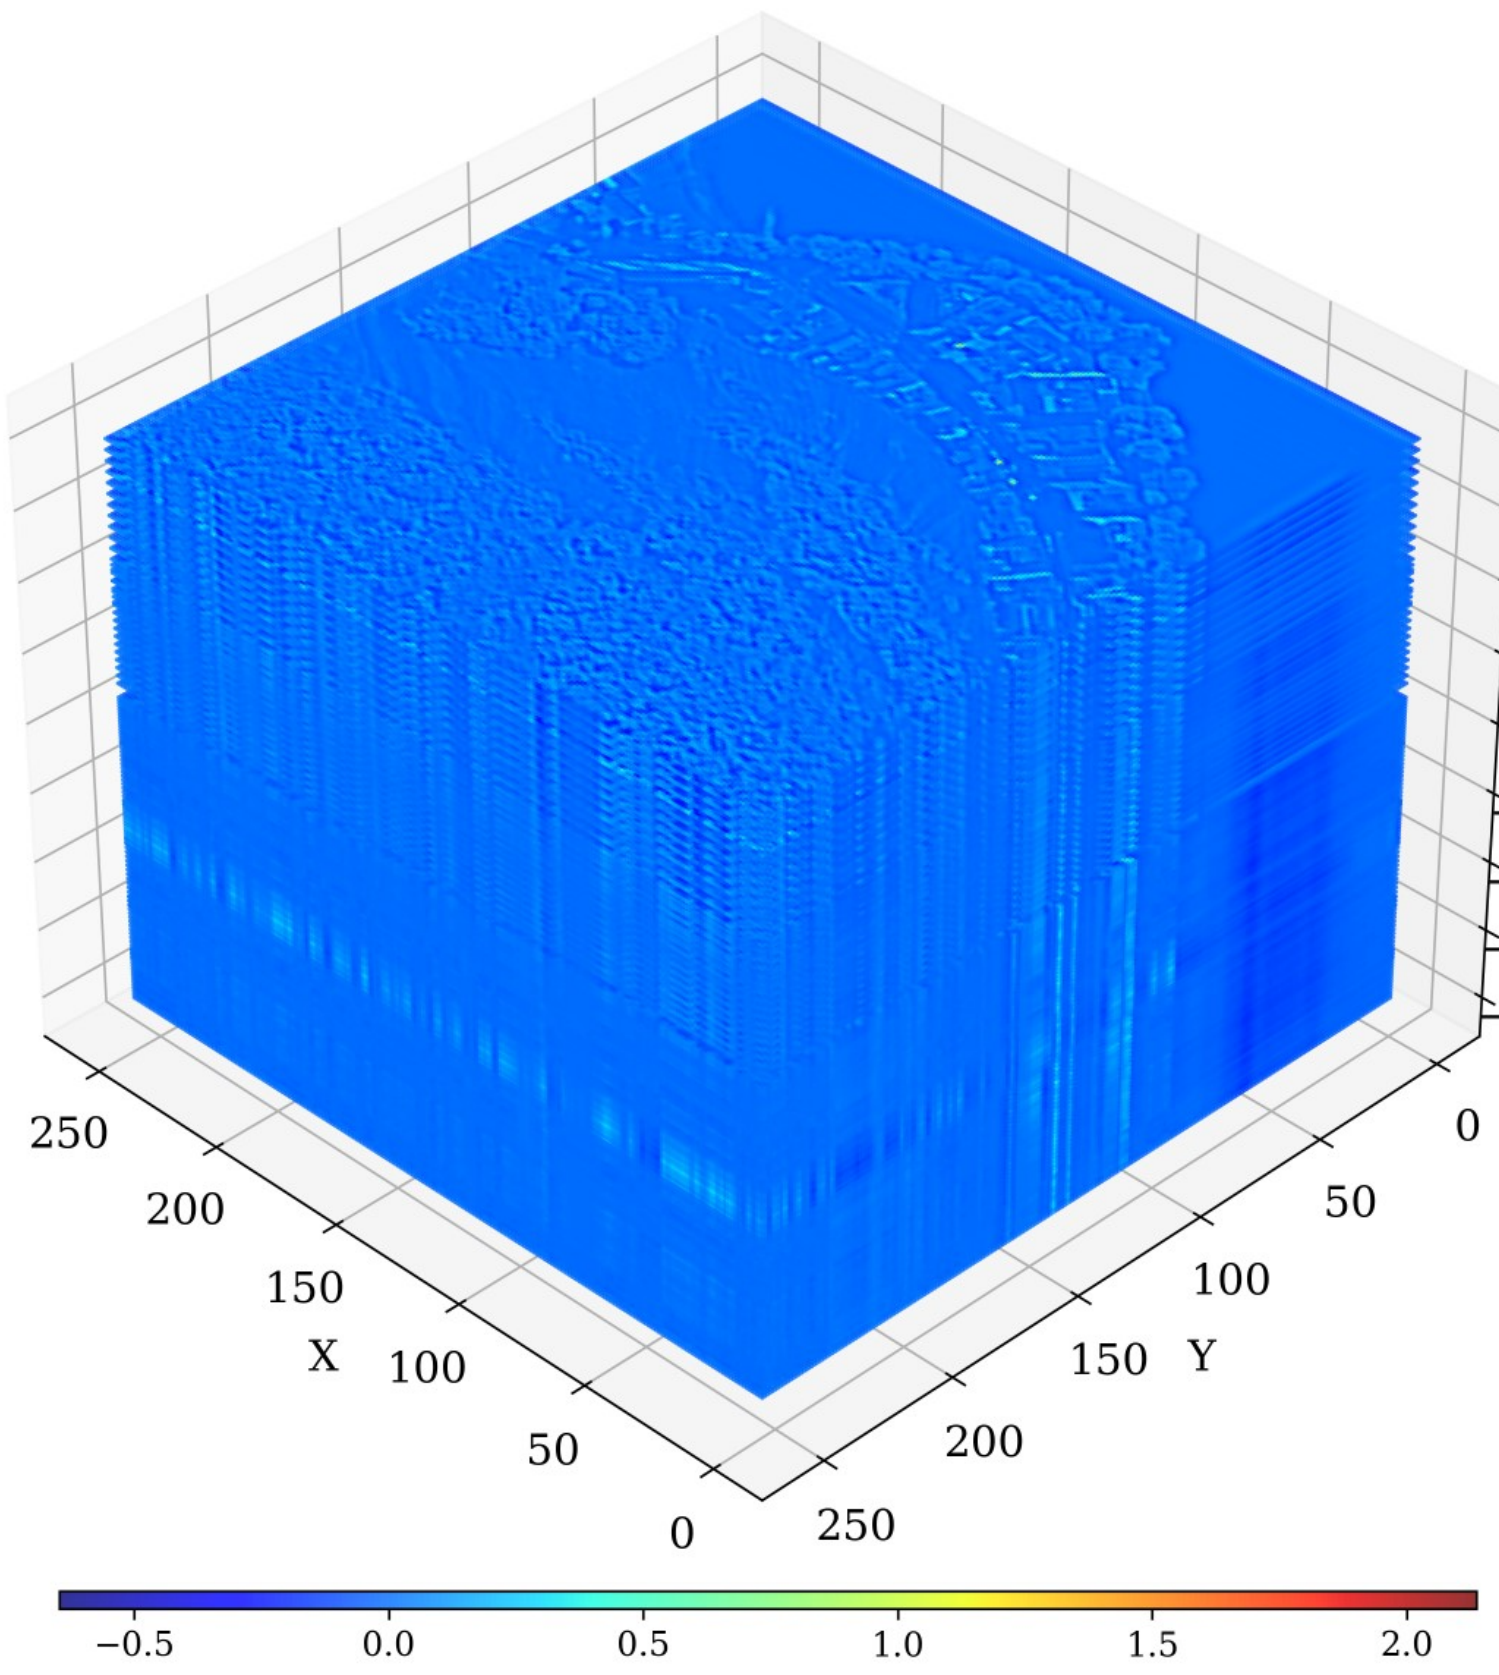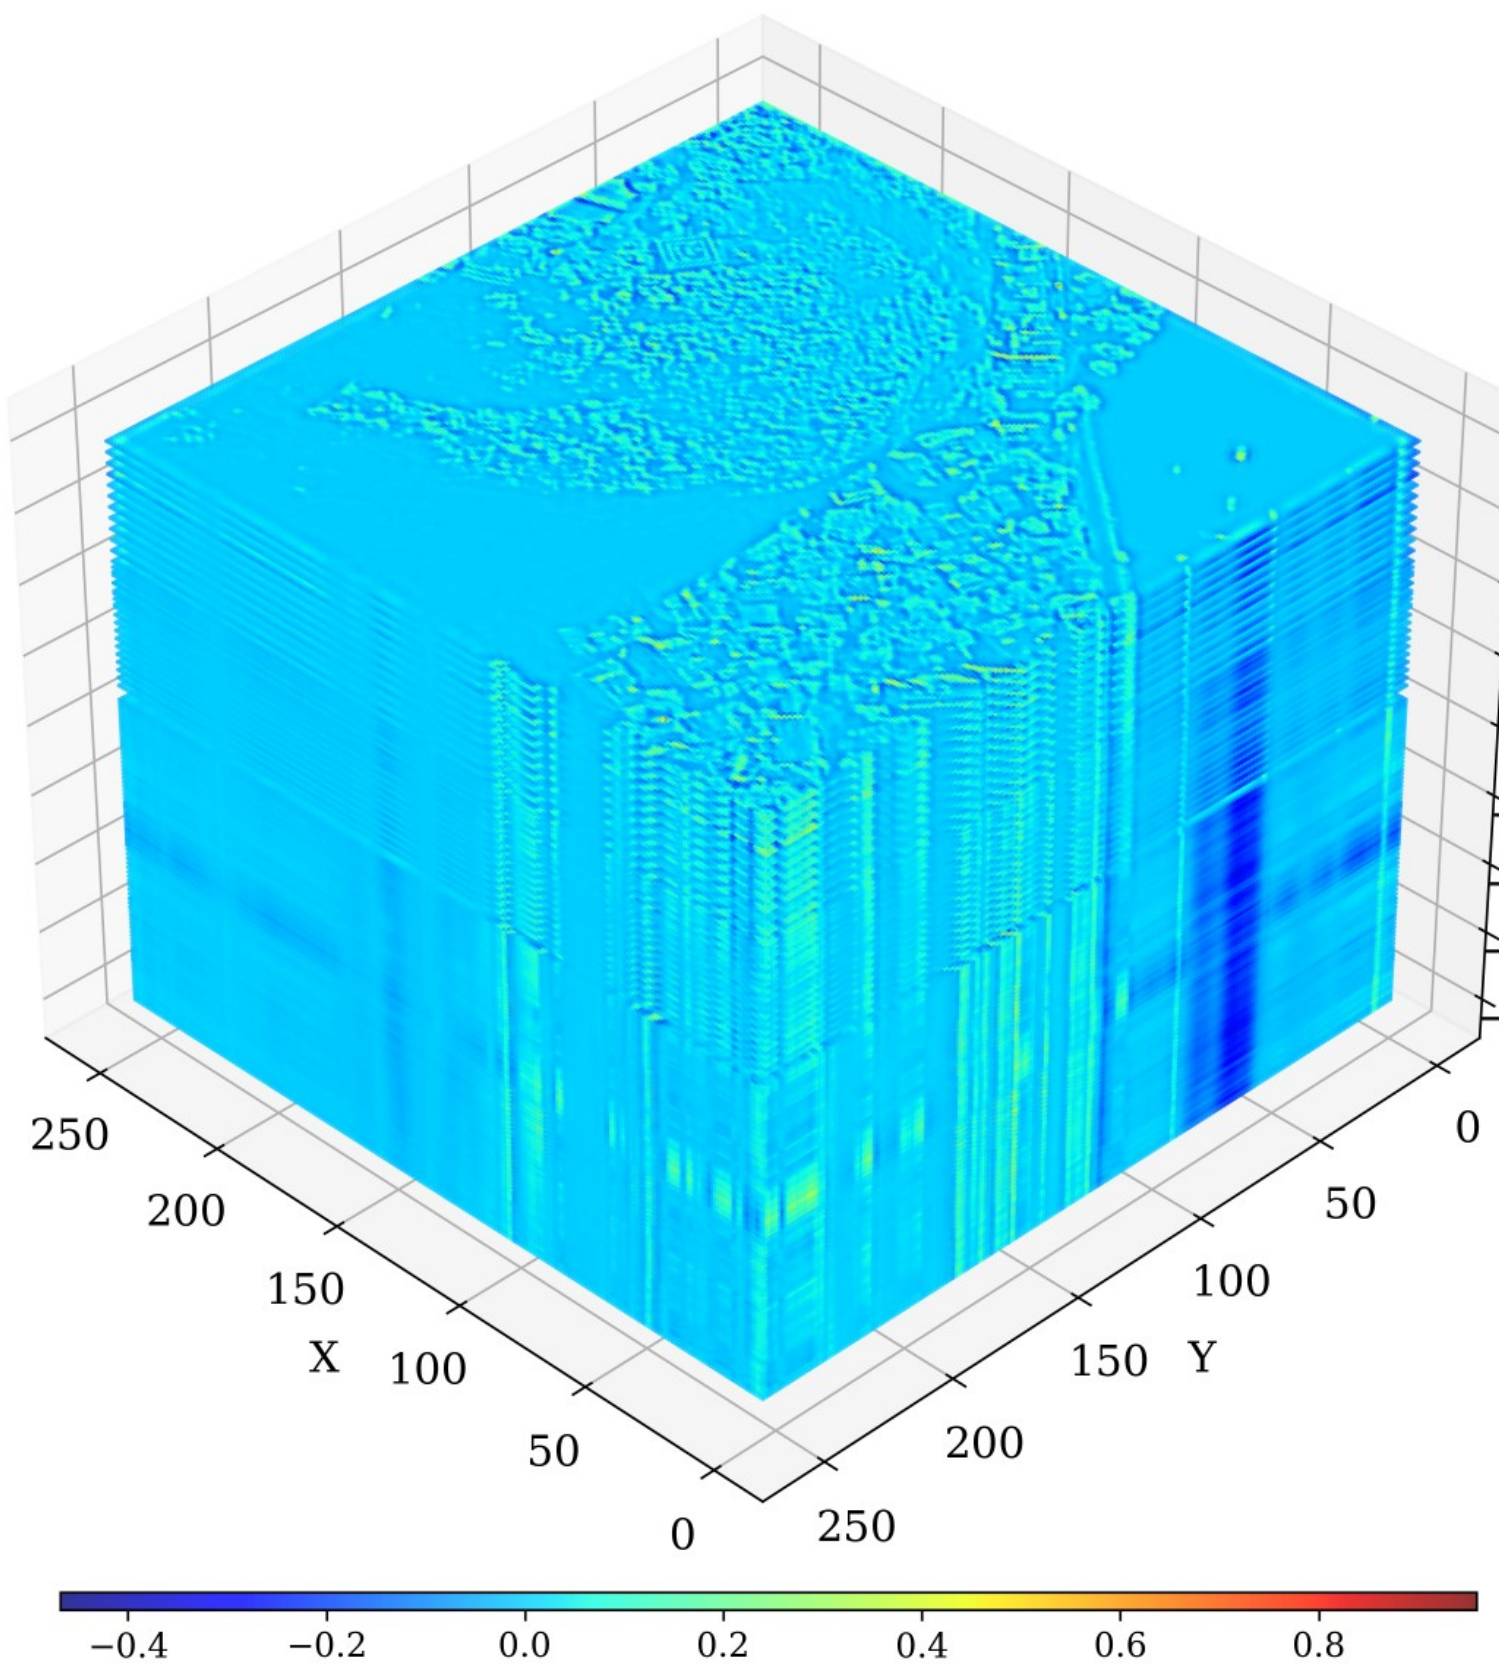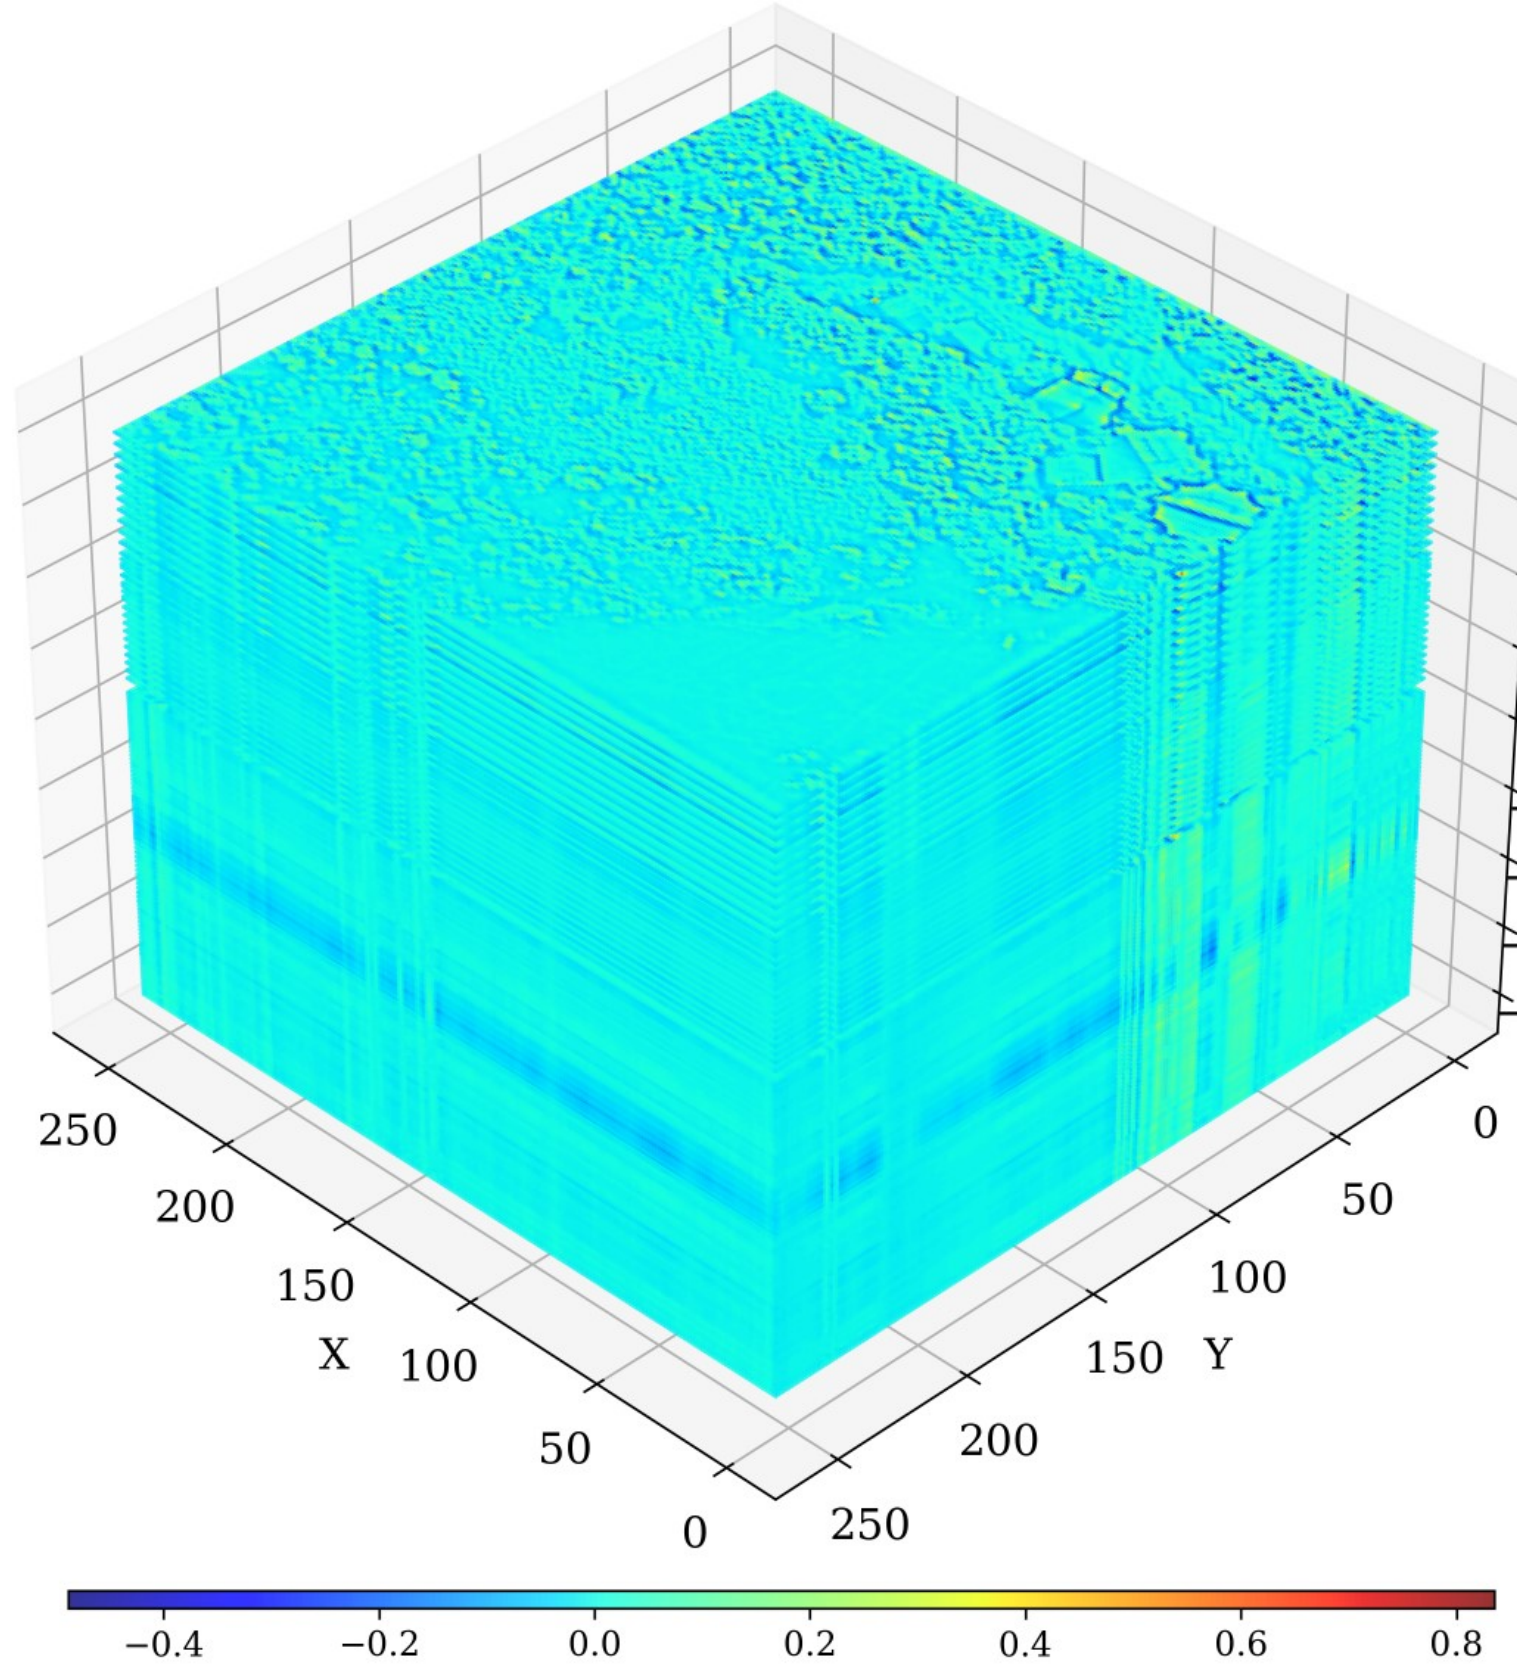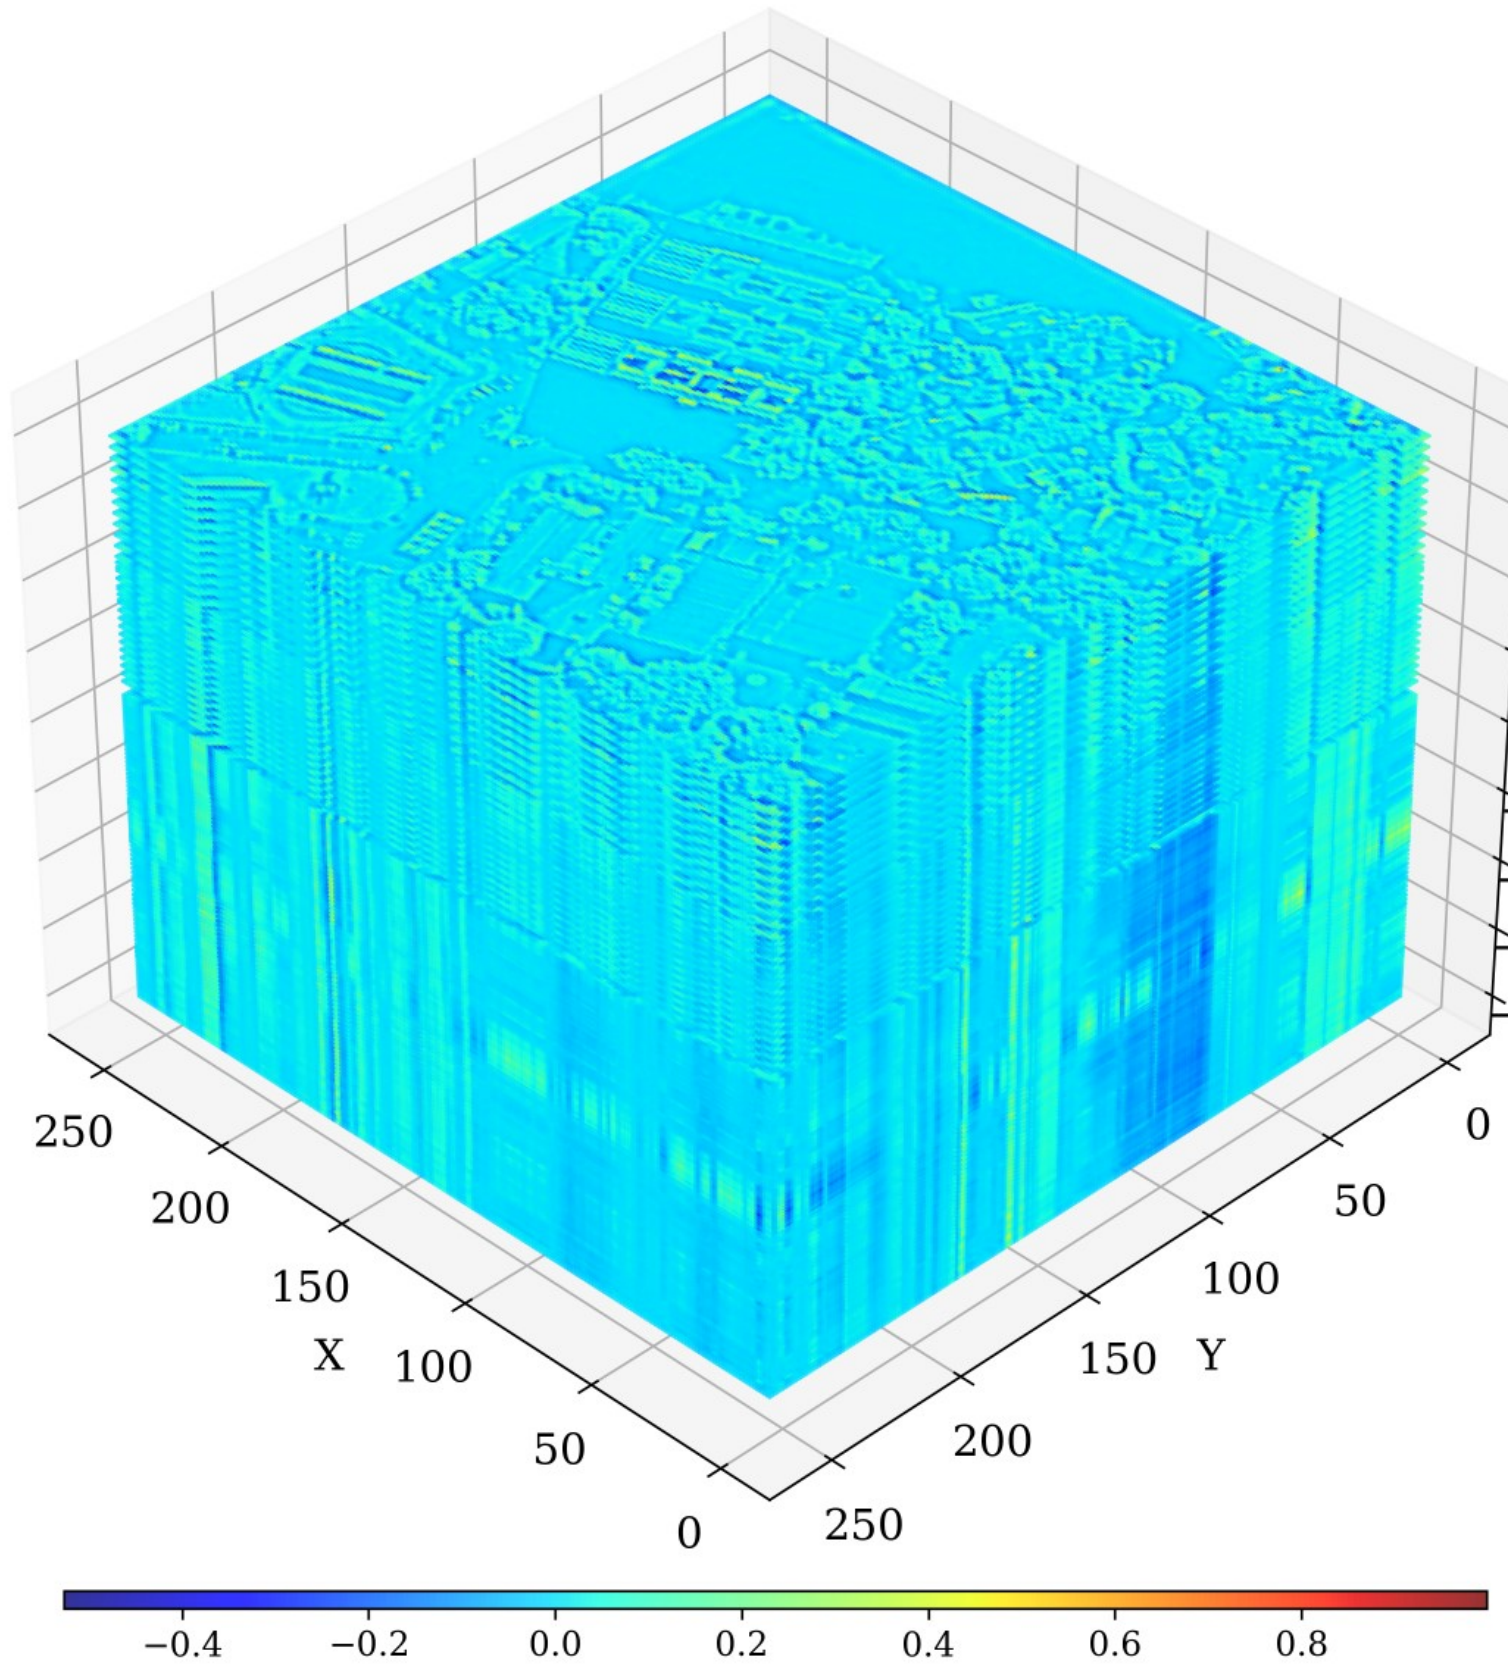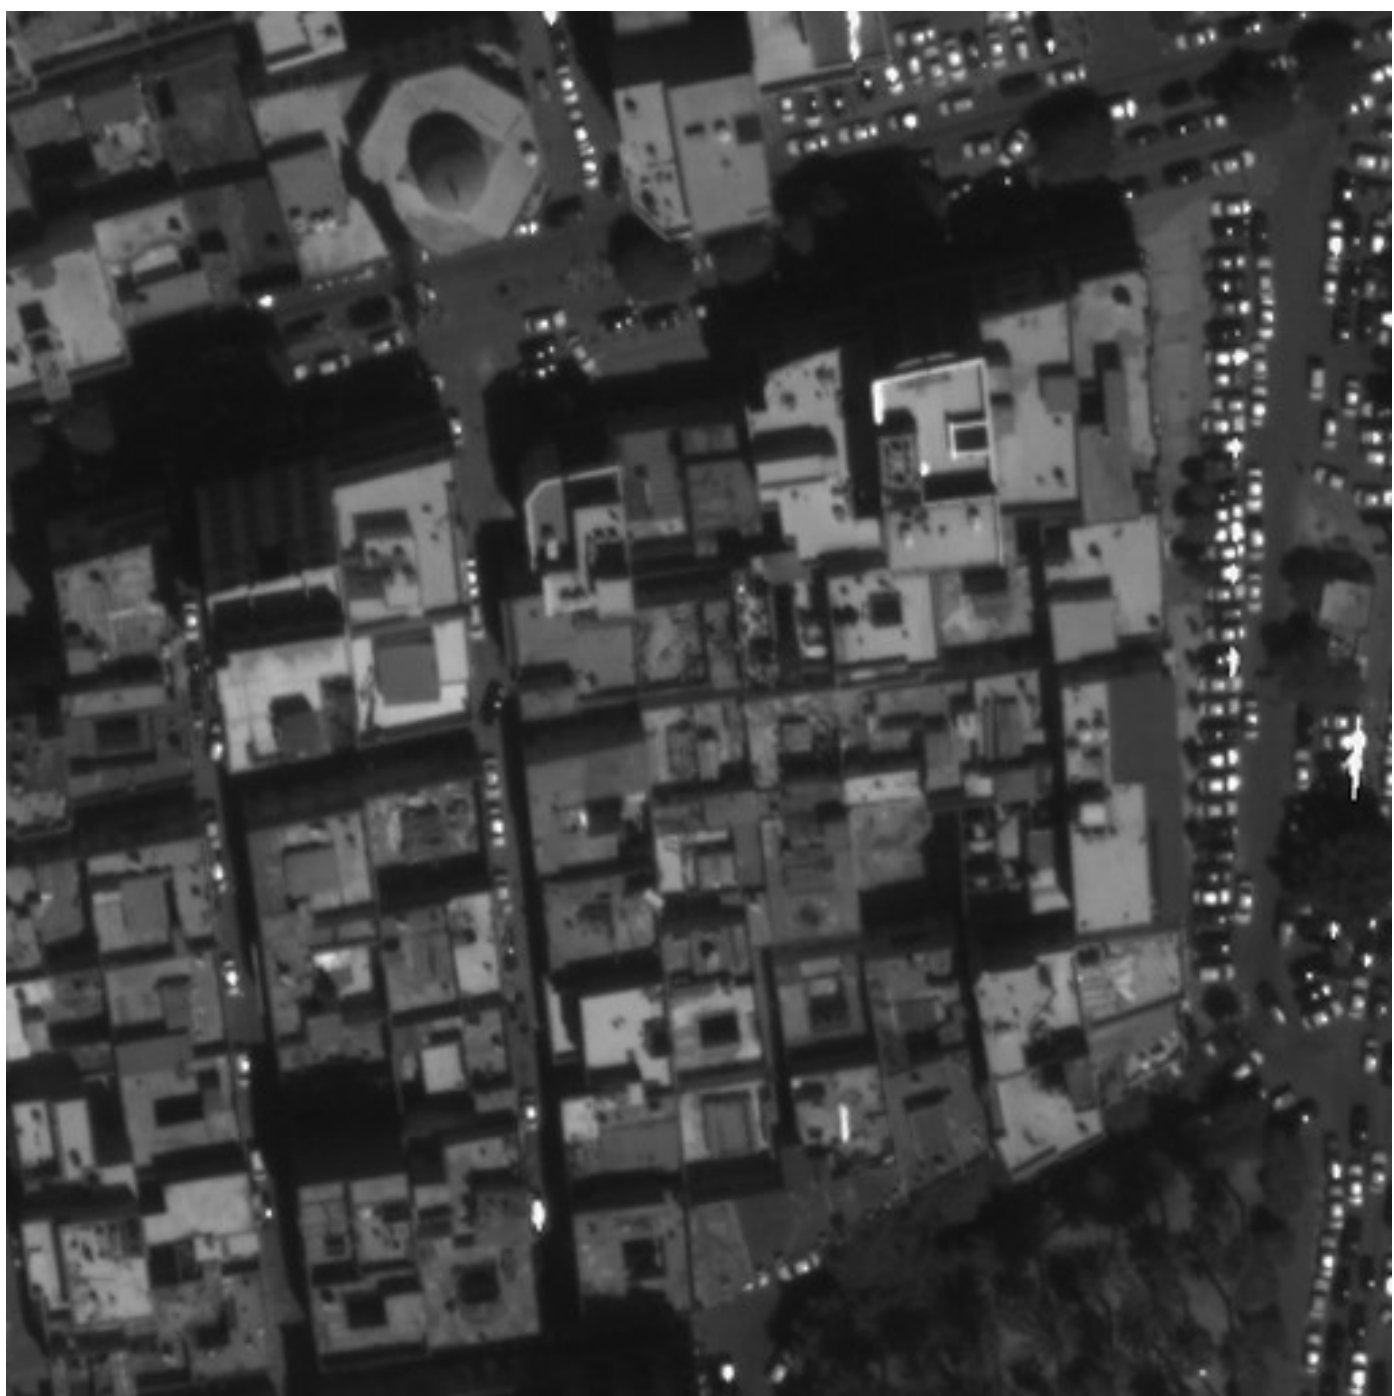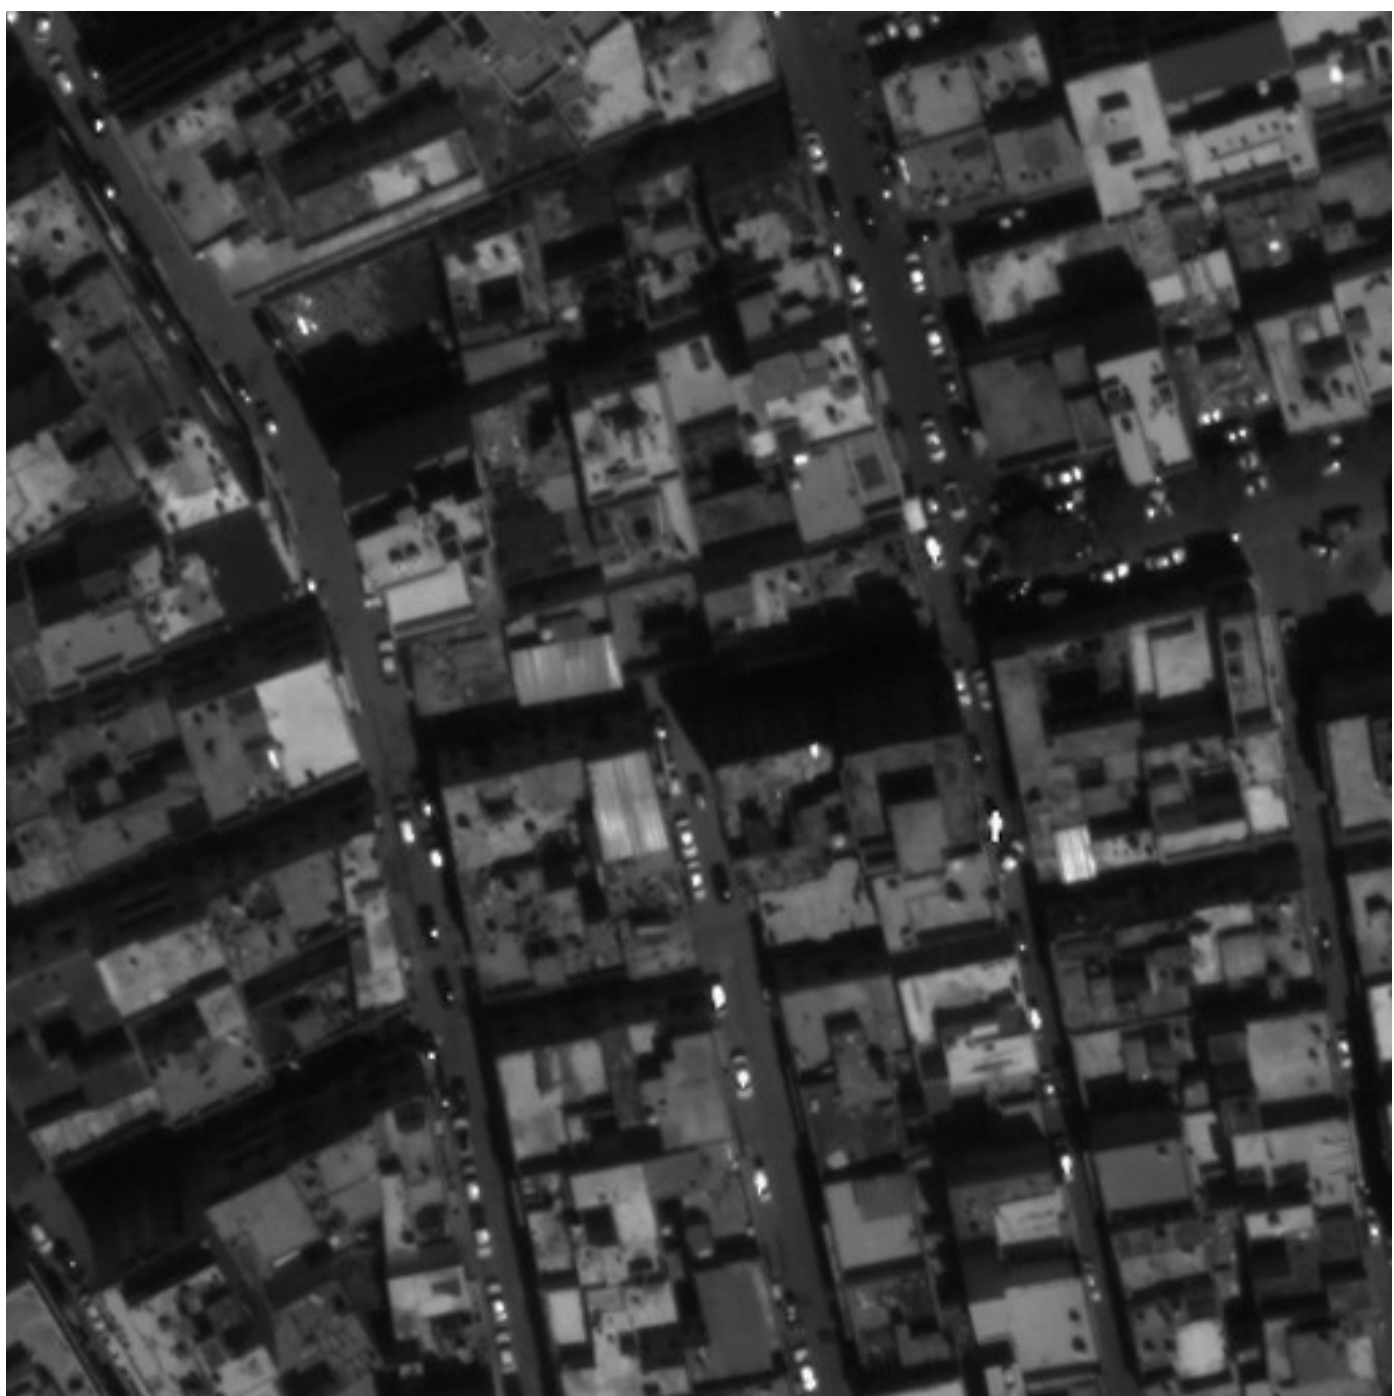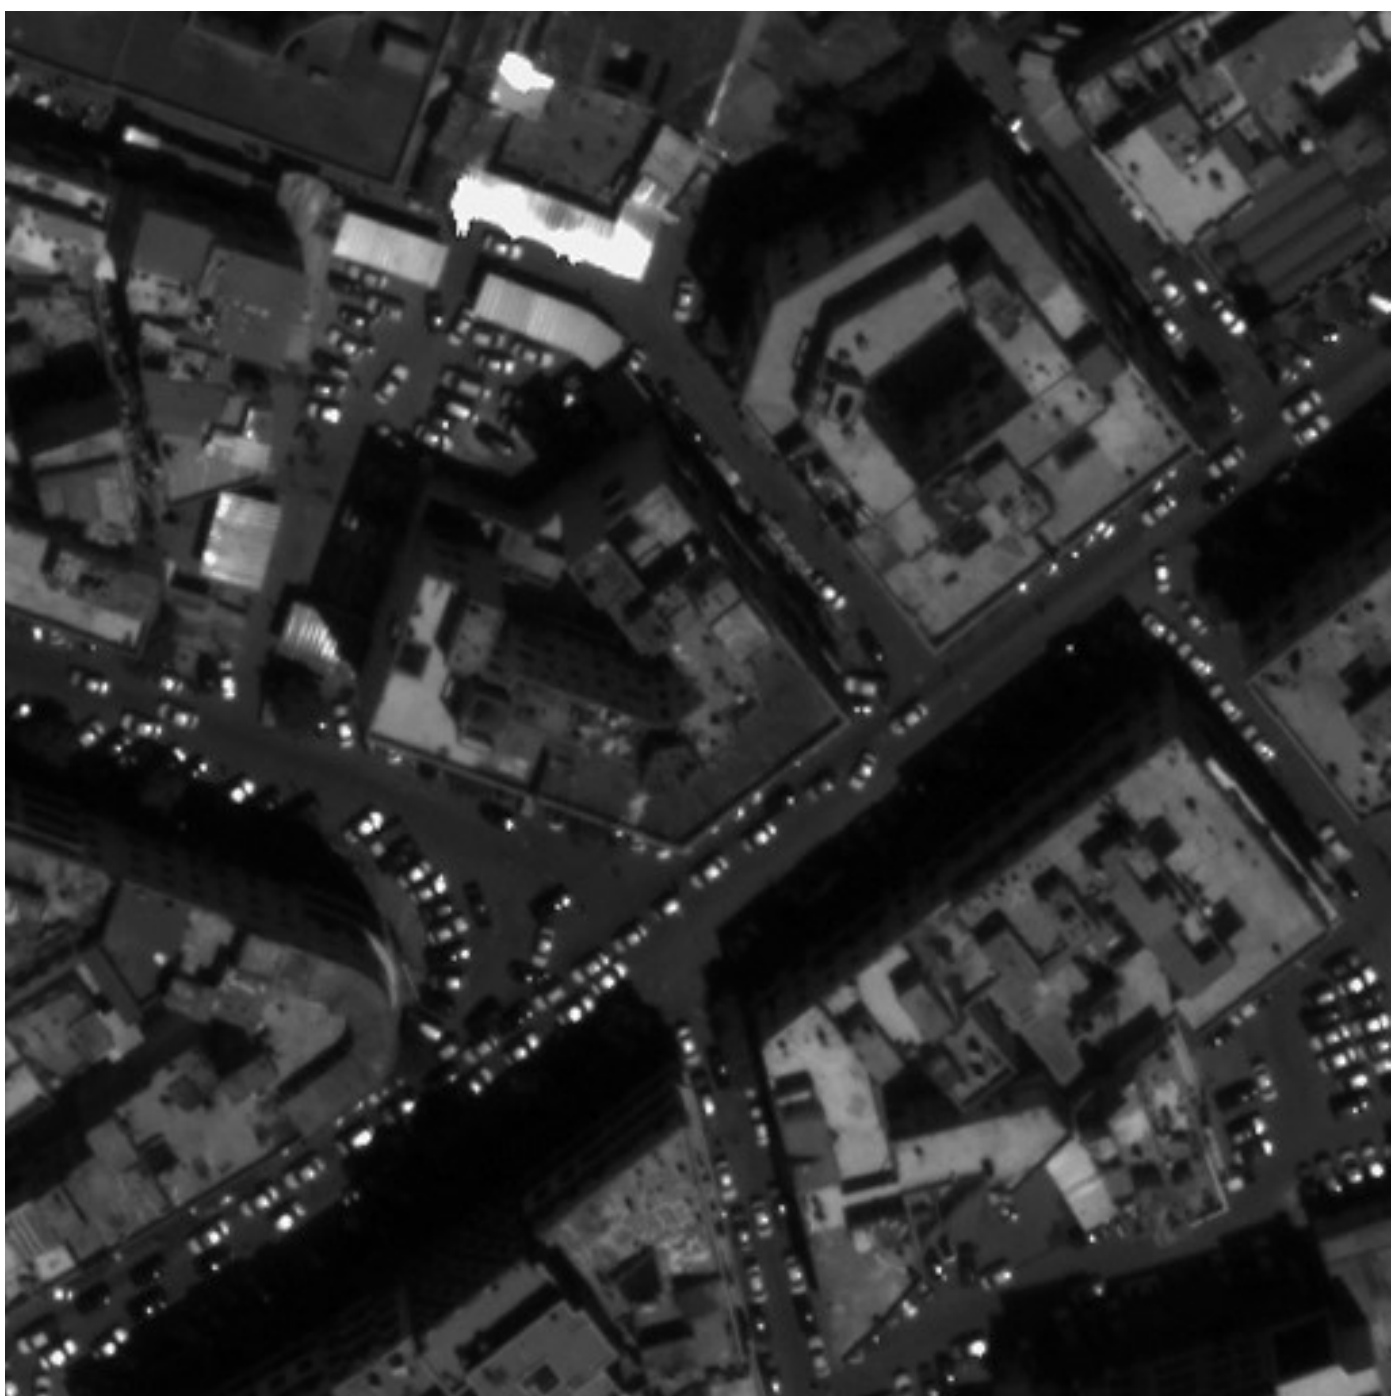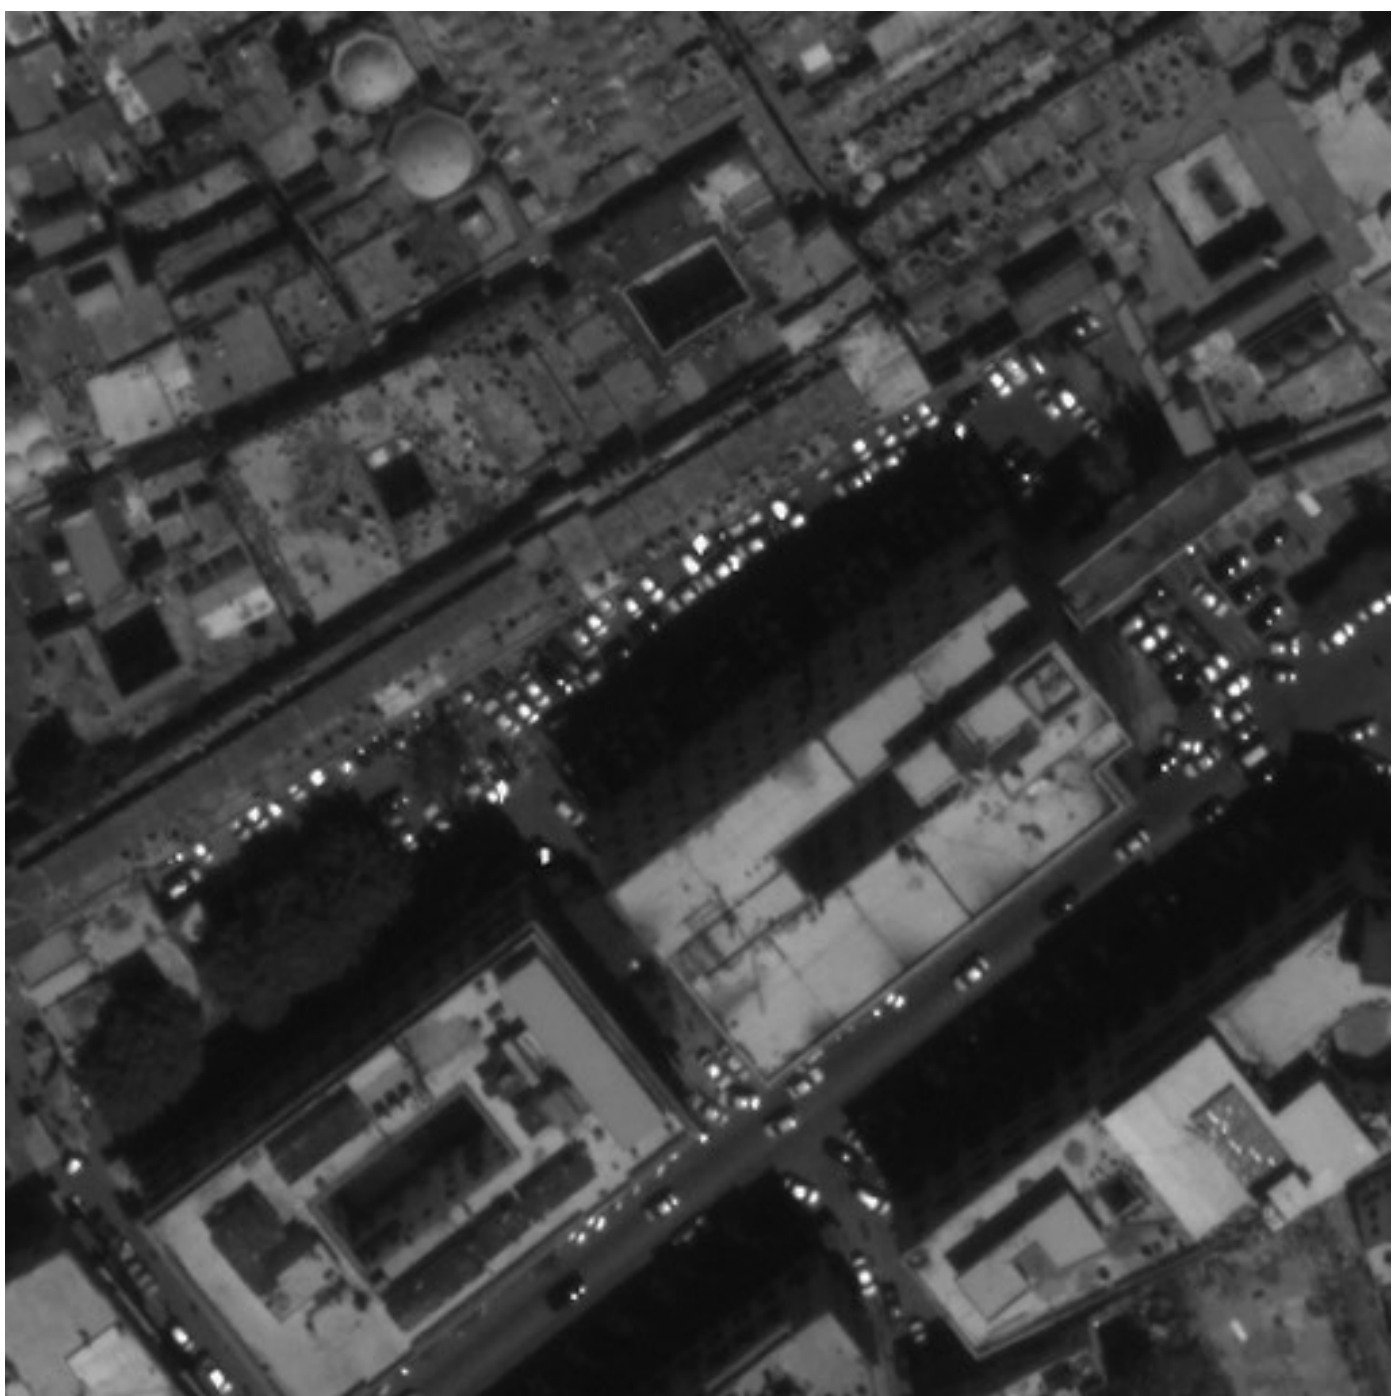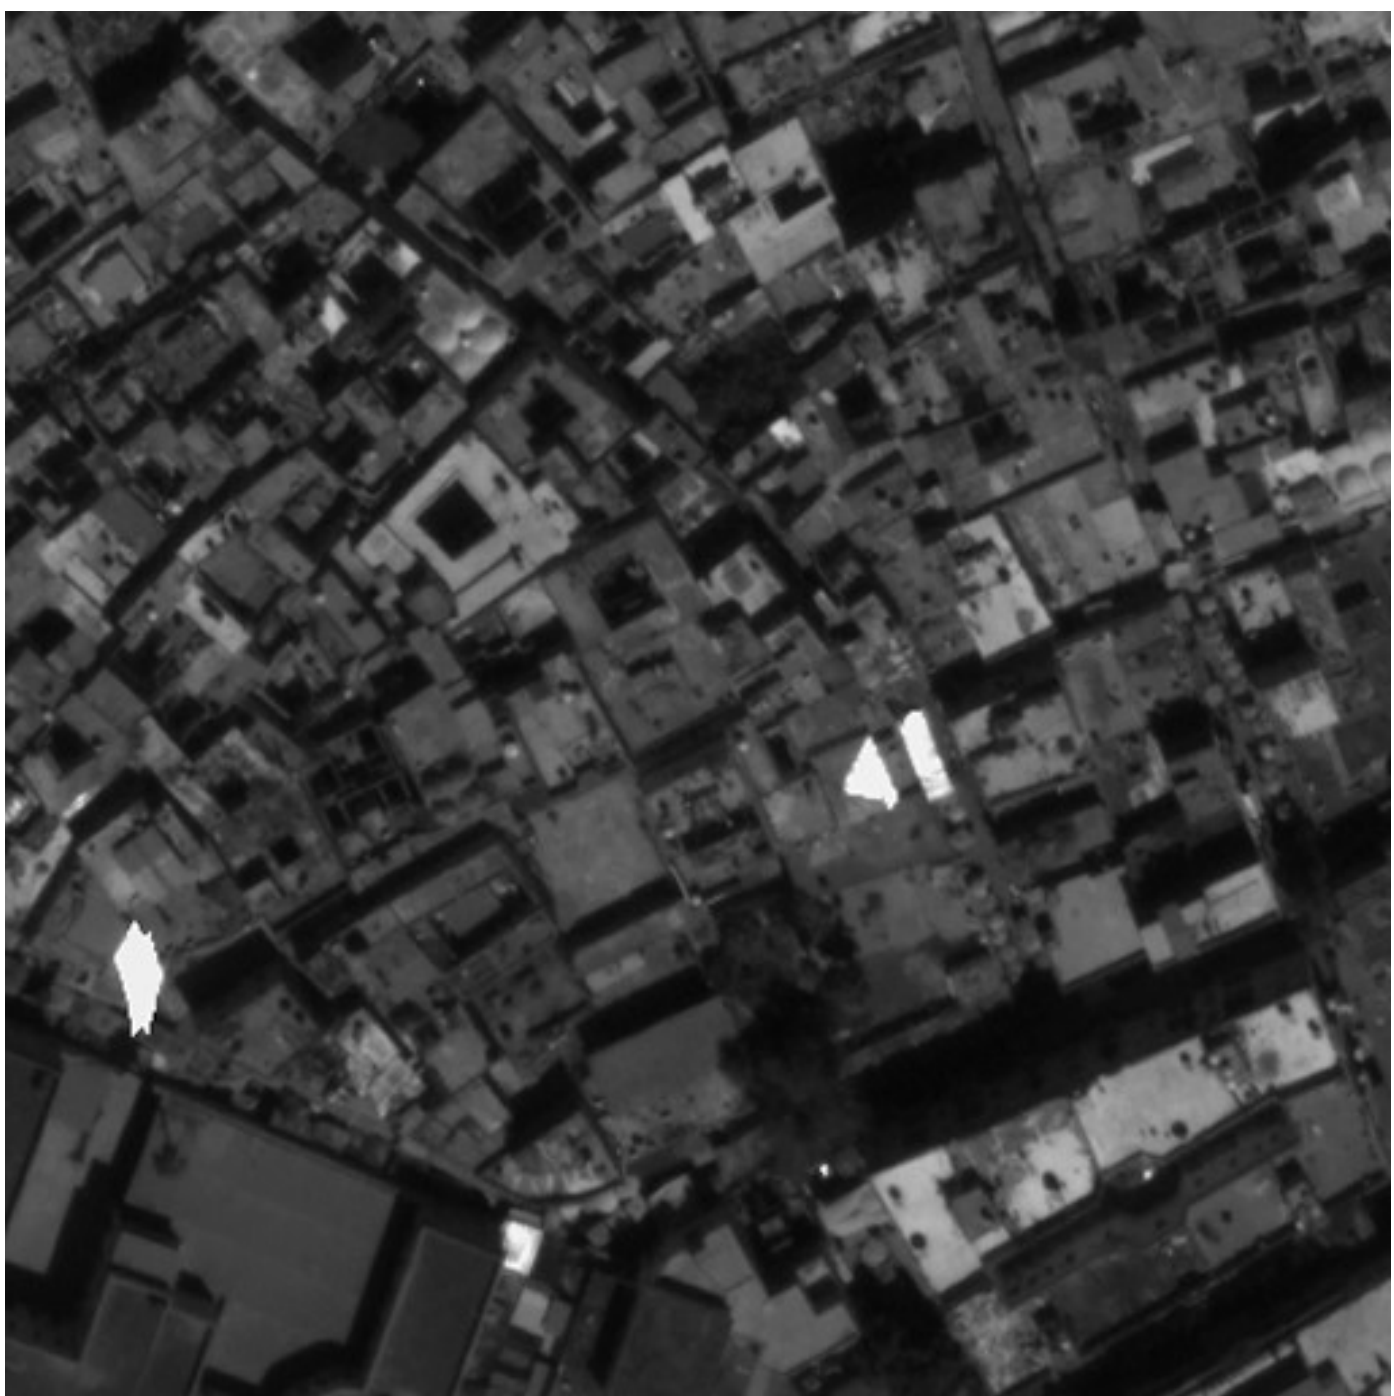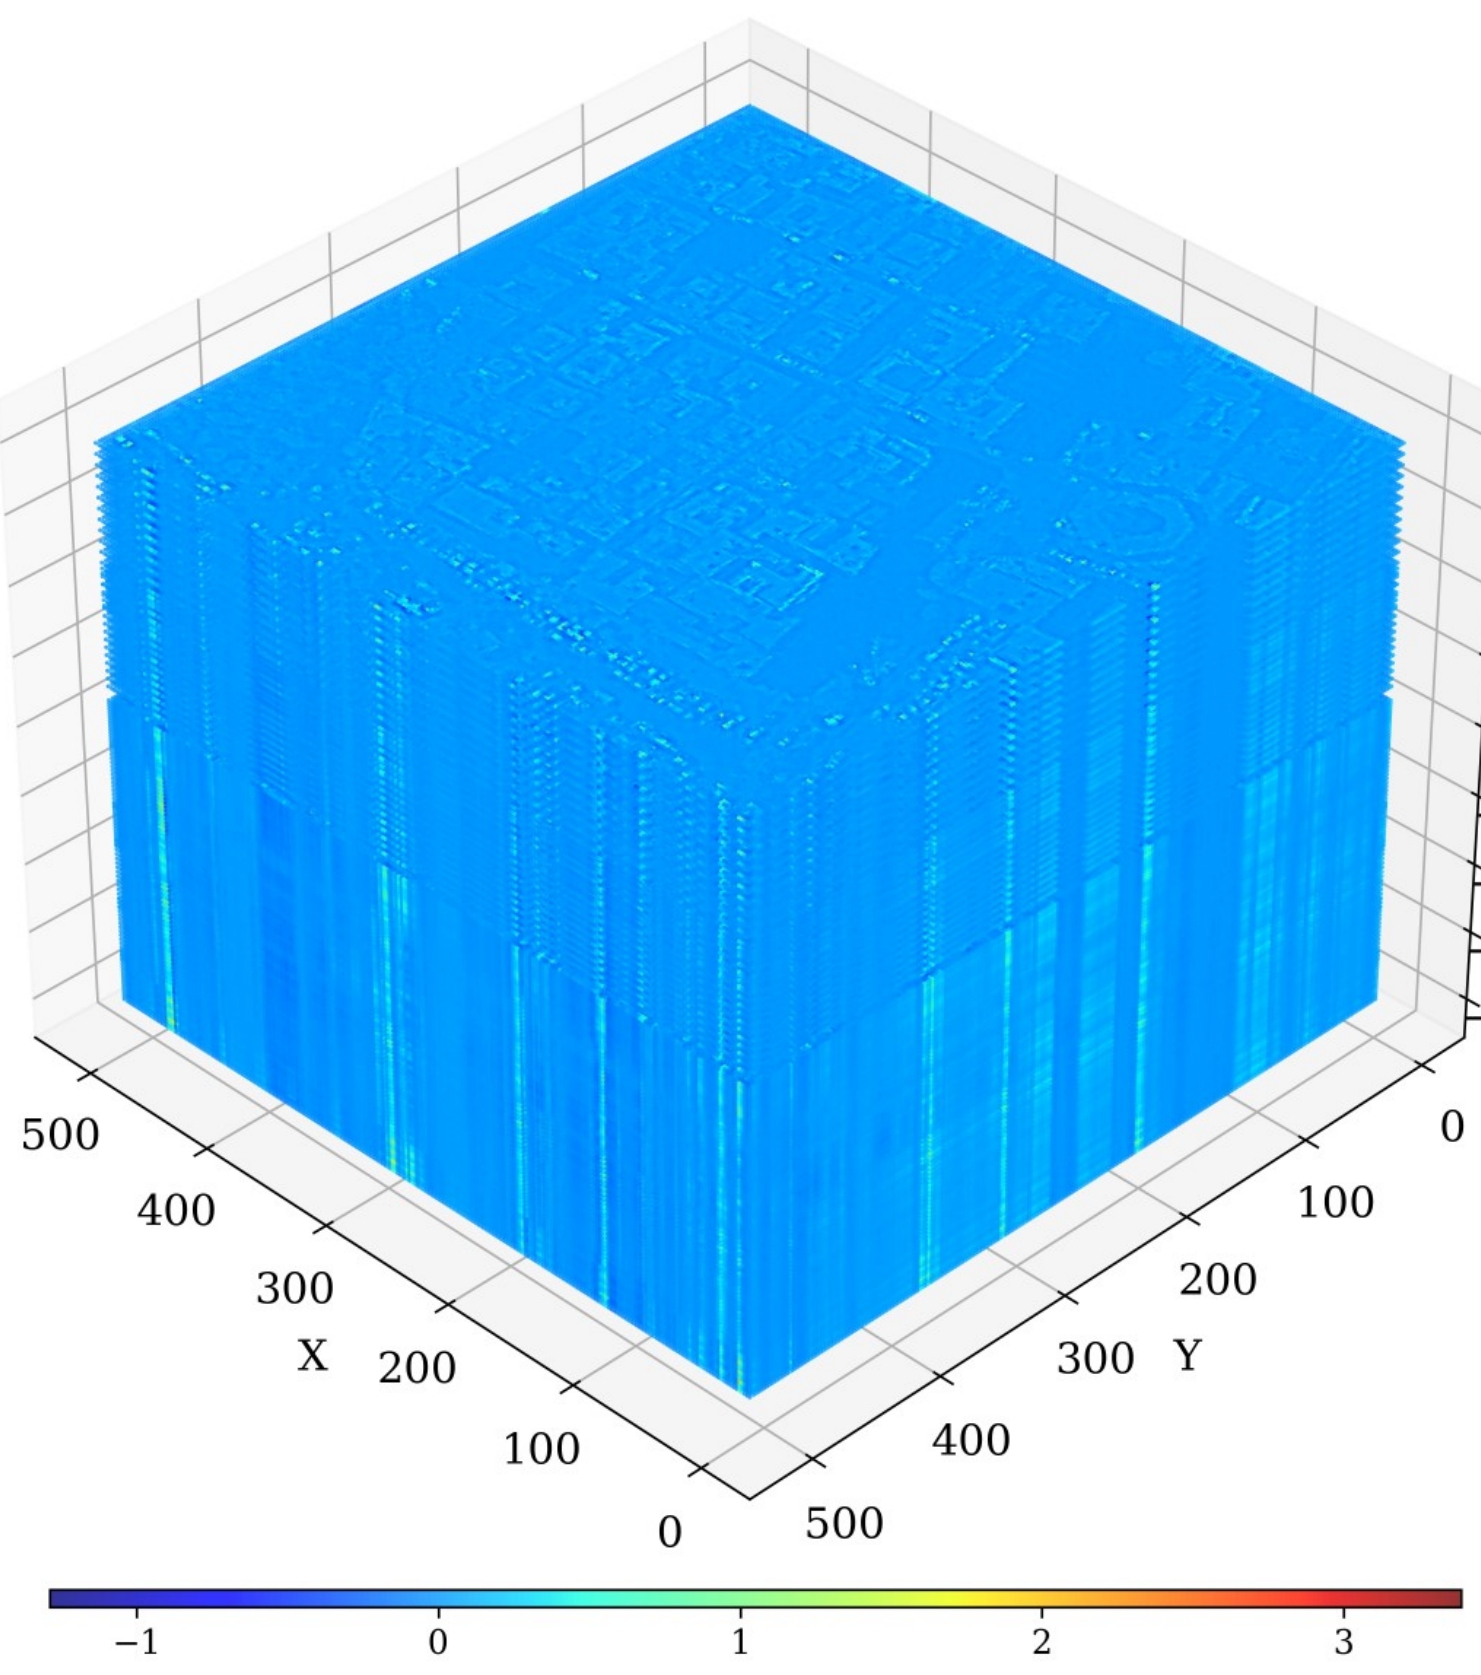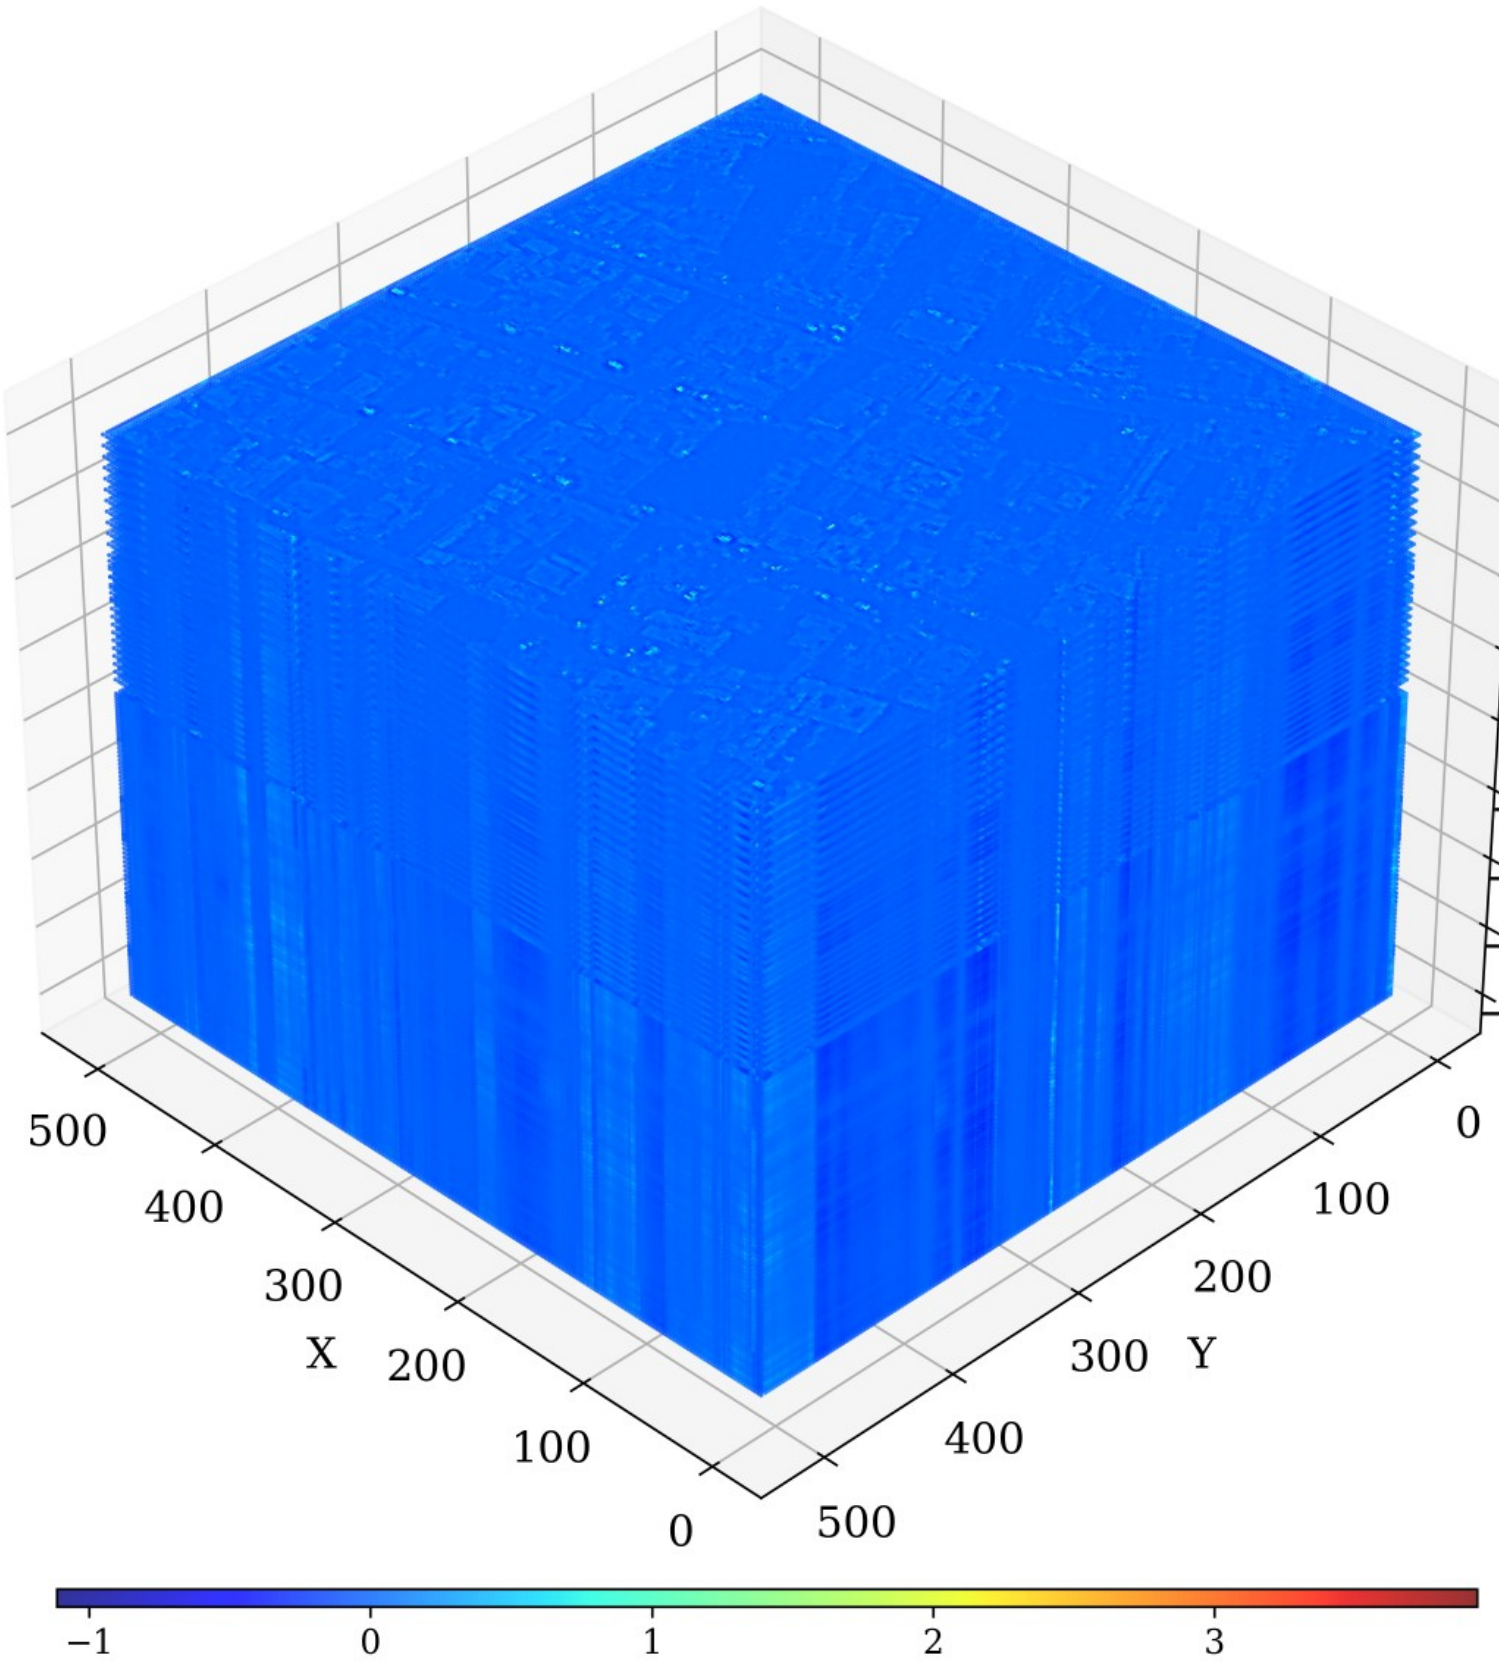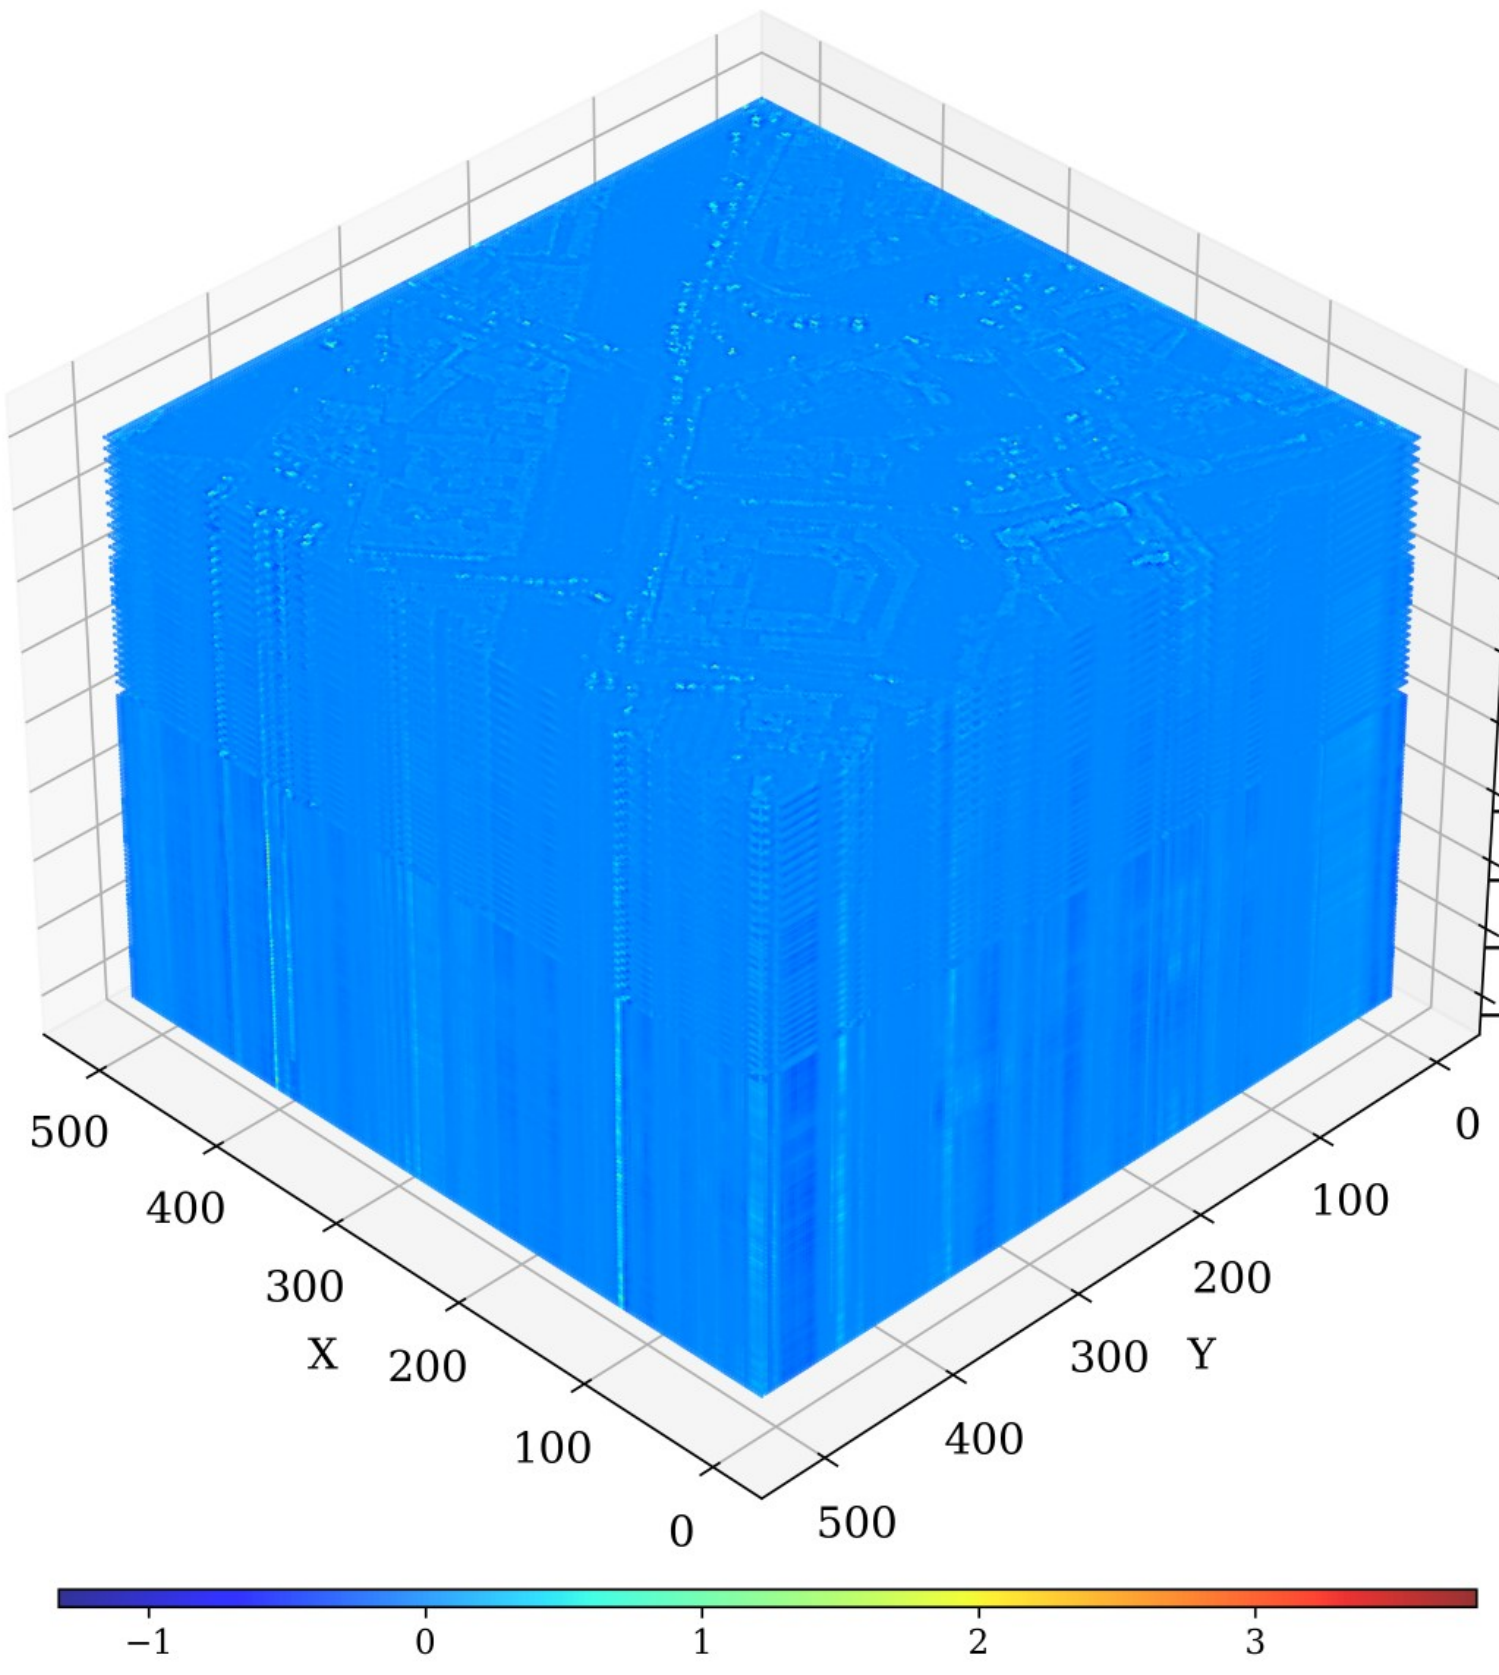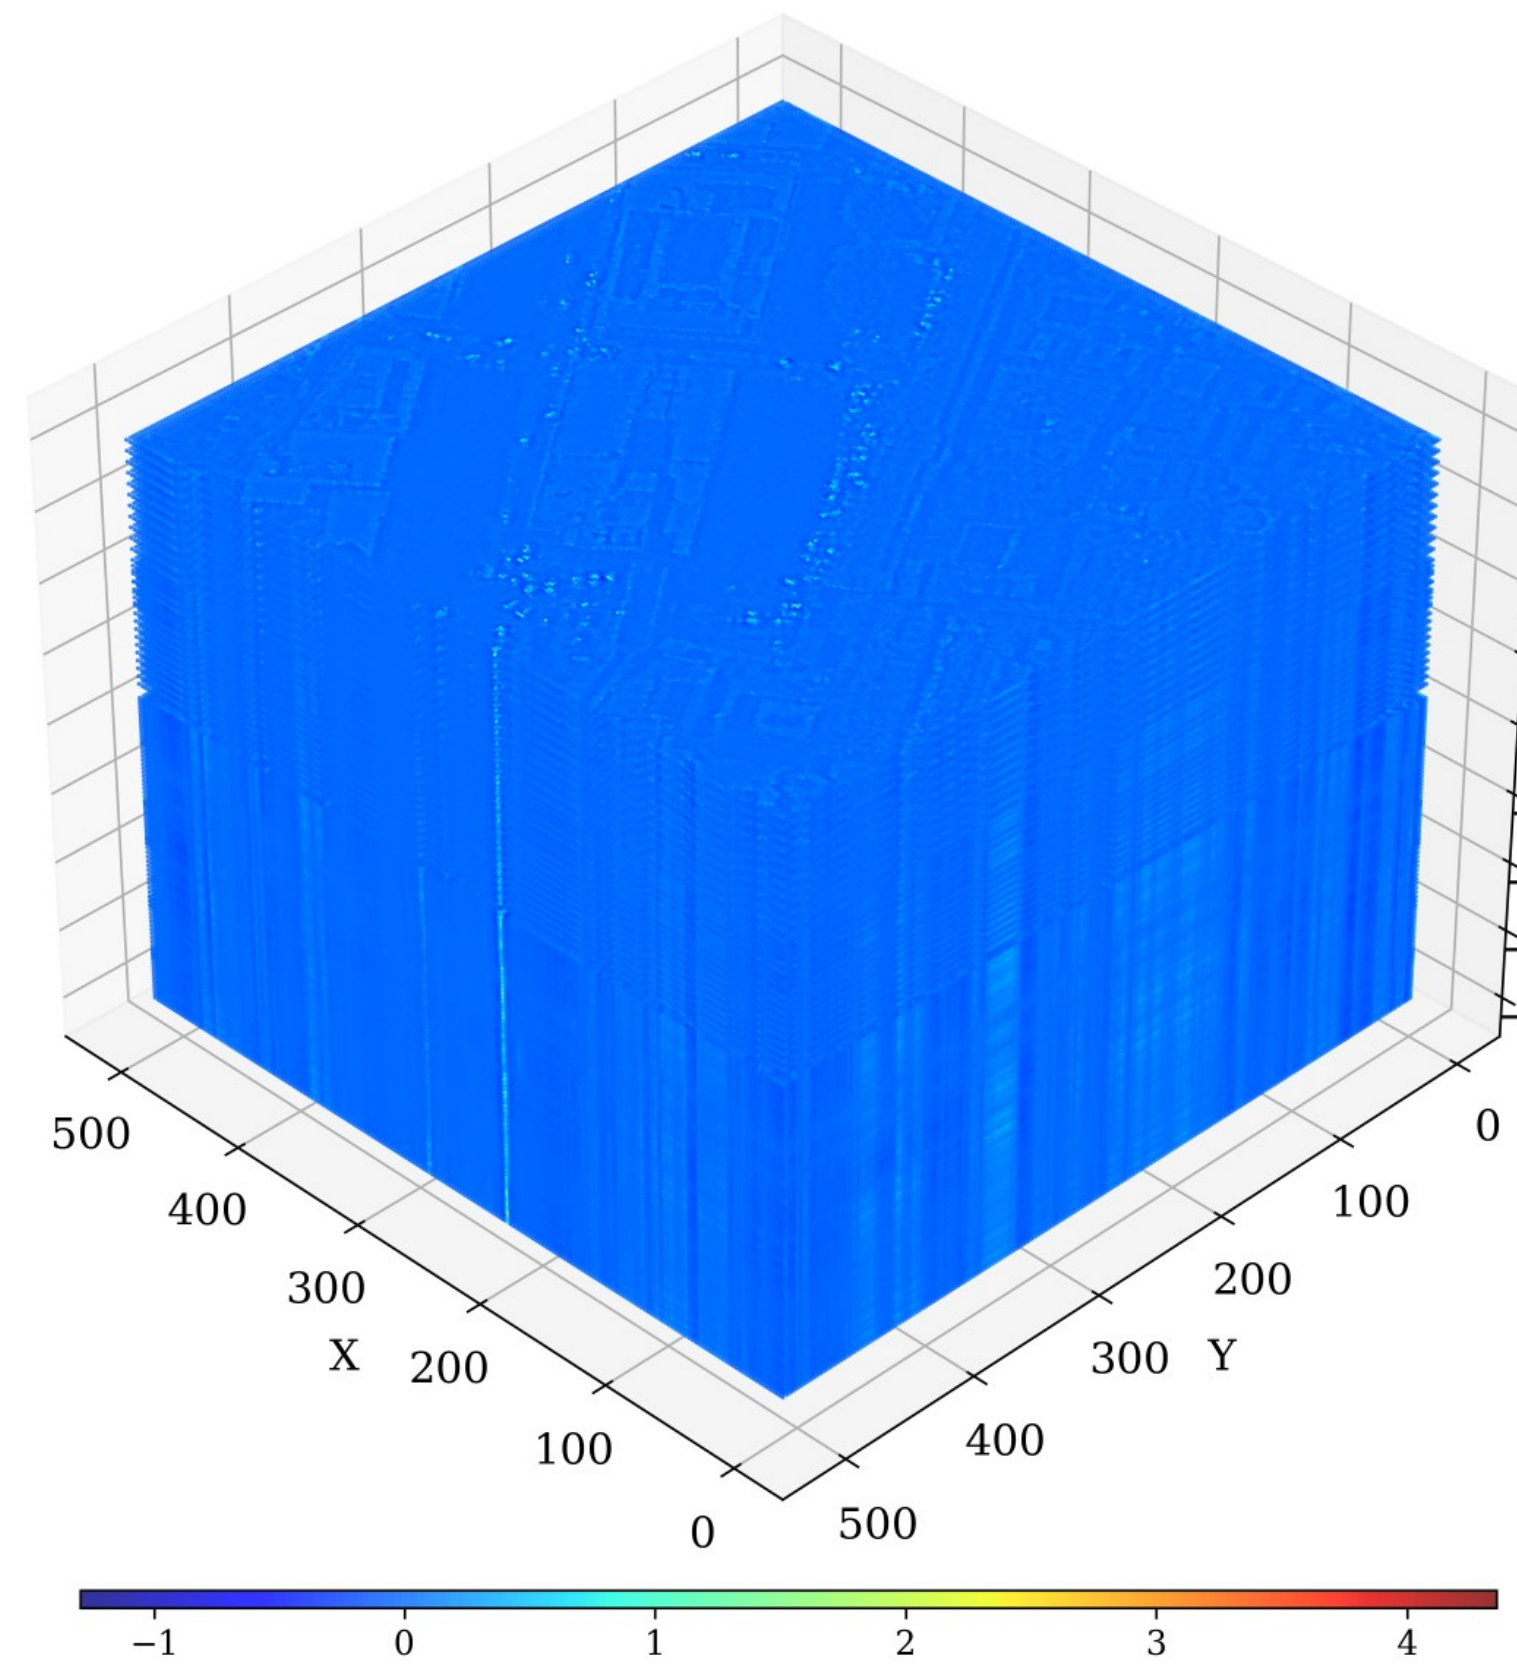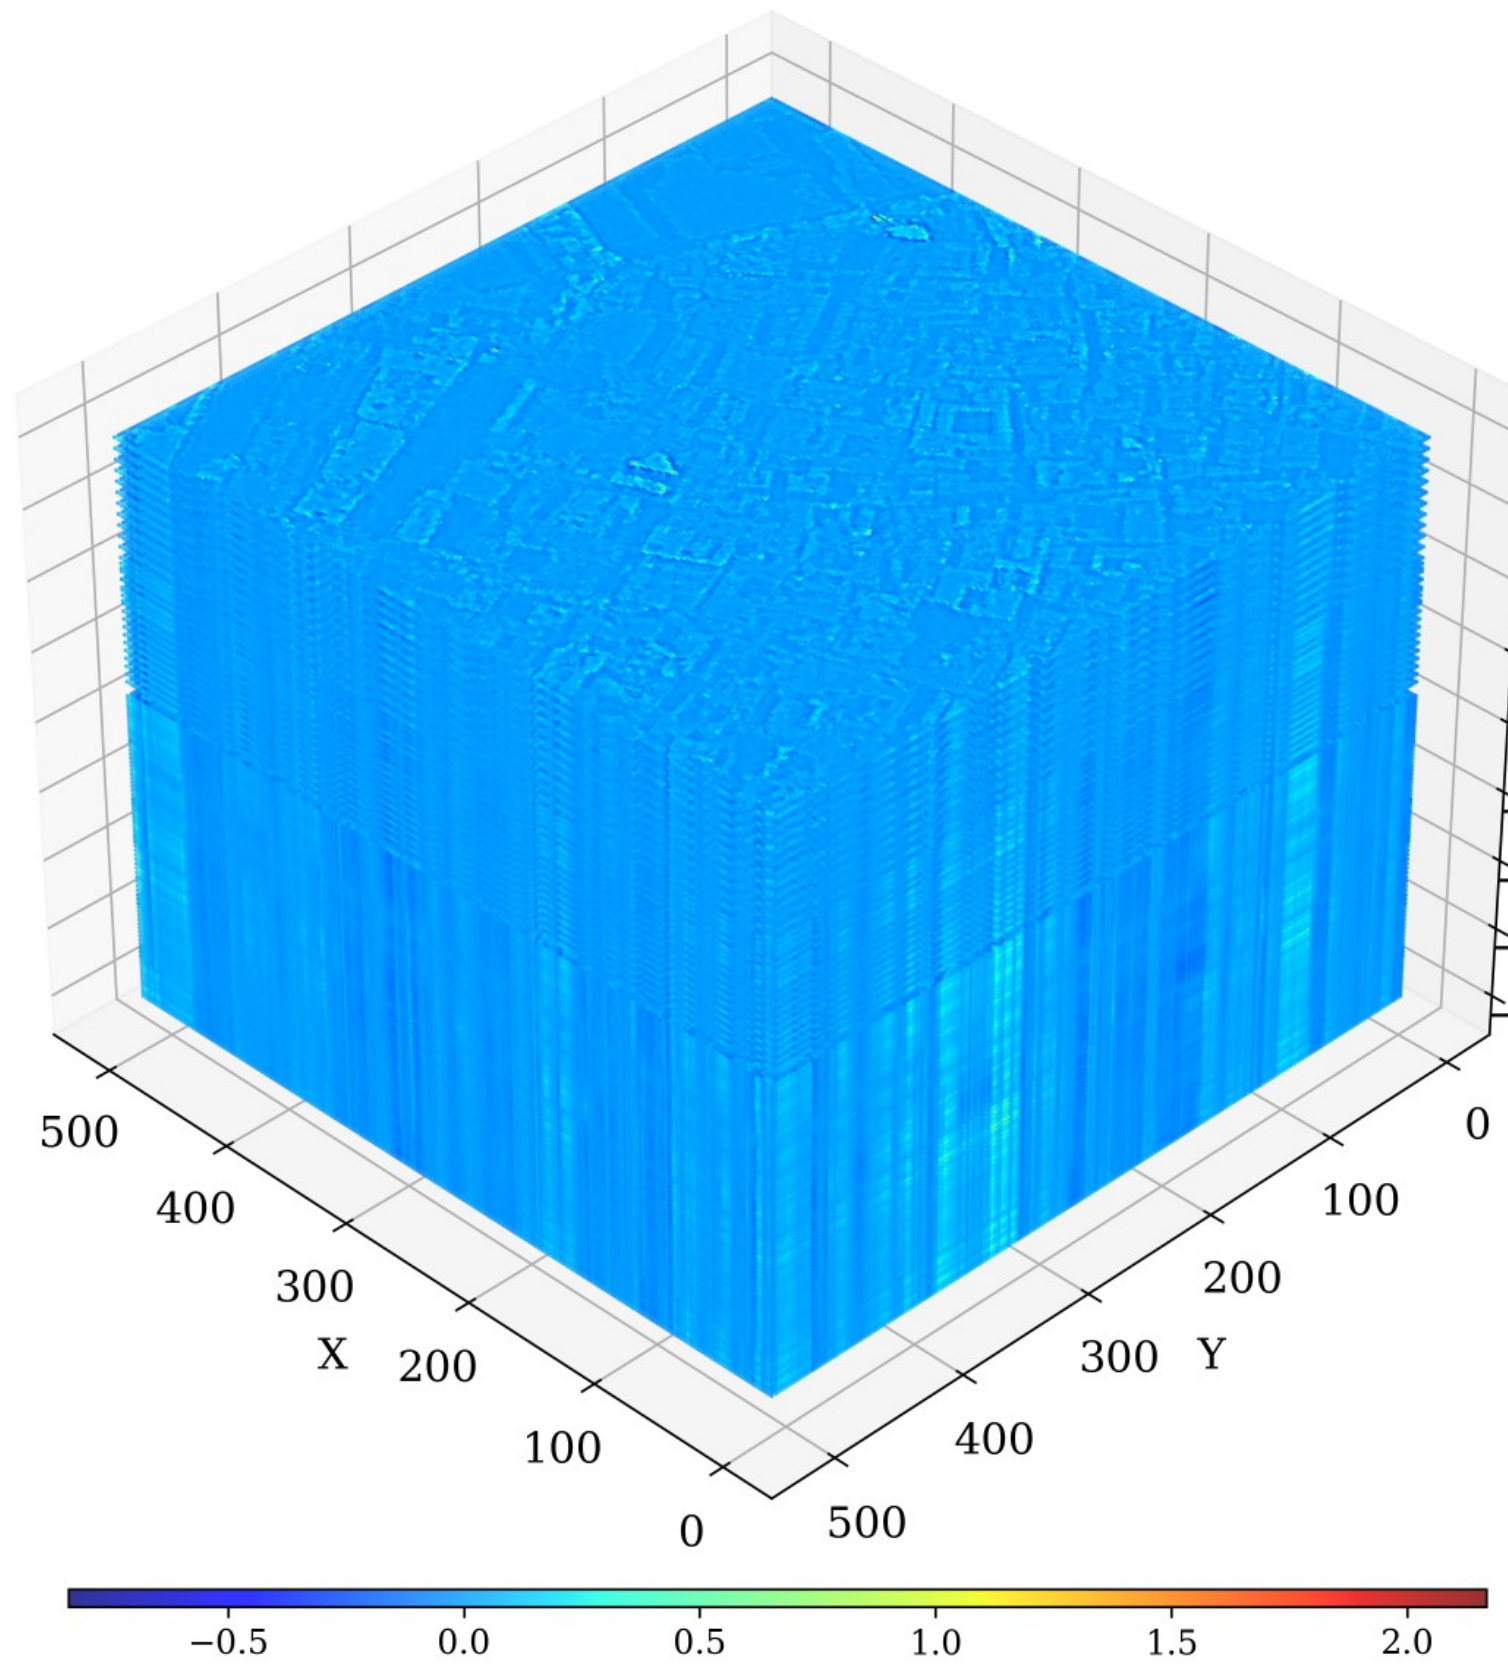

Supplement: supplementary_material [file vis_radiance_wv3.pdf › 6758_Physics-informed Neural Operator for Pansharpening_supplementary_material/vis_radiance_wv3.pdf]
